# Supplementary material
Source: publisher figshare collection journal article supplement (https://tandf.figshare.com/articles/dataset/_/13117973)
Supplement: Supplementary file 1 [file 1]

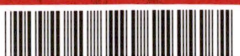

Y3375455

分类号  
UDC

学号 D13103  
密级

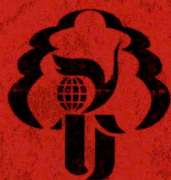

扬州大学  
YANGZHOU UNIVERSITY

## 博士学位论文

奶牛链球菌型乳腺炎乳腺组织基因表达与 microRNA 分析及  
miR-122 对 *EPO* 和 JAK-STAT 通路靶向调控

蒲俊华

指导教师姓名：杨章平 教授，扬州大学，江苏扬州，225009

申请学位级别：博士 学科专业名称：畜产品安全生产与加工

论文提交日期：2017 年 12 月 28 日 论文答辩日期：2017 年 12 月 6 日

学位授予单位：扬州大学 学位授予日期：2017 年 12 月 30 日

答辩委员会主席：王金玉

2017 年 12 月

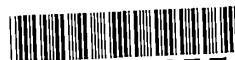

Y3375455

奶牛链球菌型乳腺炎乳腺组织基因表达与 microRNA 分析及  
miR-122 对 *EPO* 和 JAK-STAT 通路靶向调控

Expression Profiles of Genes and microRNAs from Bovine  
Mammary Glands in Response to *Streptococcus*  
*agalatiae*-induced Mastitis and Regulation of miR-122 on *EPO*  
and JAK-STAT pathway

研究生： 蒲俊华

导 师： 杨章平 教授

专 业： 畜产品安全生产与加工

(扬州大学动物科学与技术学院，江苏 扬州，225009)

国家自然科学基金资助项目(31272407; 31372286)

Supported by the Natural Science Foundation of China  
(31272407; 31372286)

## 摘 要

奶牛乳腺炎是奶牛最常见的高发疾病,造成严重的经济损失,长期困扰世界奶牛业发展。奶牛乳腺炎主要由病原菌侵入乳腺组织而造成乳腺内的感染,链球菌即是其中主要的致病菌之一。链球菌属革兰氏阳性菌,呈球形或卵圆形,多数呈链状或成对生长。无乳链球菌在奶牛乳腺的感染率可达 11%-43%,感染后奶牛乳腺的自愈率较低。尽管抗生素是目前治疗乳腺炎的有效手段,但无乳链球菌对青霉素 G、阿莫西林、氨苄青霉素等的耐药率已达 50%-100%。解决这一问题需要深入研究病原菌的致病机理和机体免疫应答机制,为寻找新的防控乳腺炎的方法提供理论基础。

microRNA(miRNA)是一类长约 22 个核苷酸的单链非编码 RNA,miRNA 可调控超过 60%的编码蛋白基因,涉及细胞的生长、增殖、凋亡及免疫调控等生命活动过程。利用 miRNA 表达的特异性,寻找乳腺组织在炎症免疫应答过程中差异表达的 miRNAs,有助于从分子水平上了解机体免疫应答的机理,为防控乳腺炎提供新的思路。本研究通过人工诱导方式建立奶牛无乳链球菌型乳腺炎模型,采用 Affymetrix 牛全基因组芯片技术获得链球菌型乳腺炎乳腺组织的差异表达基因,筛选与免疫相关的通路。同时采用 Solexa 高通量深度测序技术构建两组小 RNA 文库,分析链球菌组差异表达的 miRNAs,对 miRNAs 的预测靶基因进行 GO 和 KEGG 分析。综合分析结果,确定进一步研究 miR-122 是否通过靶向 *EPO* 而调控 JAK-STAT 通路。将 miR-122 在乳腺上皮细胞过表达和抑制表达后,采用实时荧光定量技术检测其对靶基因 *EPO* 及其 JAK-STAT 通路的相关基因 *EPOR*、*JAK2*、*STAT5A*、*STAT5B*、*Bcl-2* 表达的影响,再用双荧光素酶报告基因系统验证 miR-122 对 *EPO* 3'UTR 的靶向调控作用。本研究得到的结果如下:

### (1) 奶牛链球菌型乳腺炎模型的建立

链球菌人工诱 24h 后,试验乳区出现明显的乳腺炎临床症状:红肿、发热,触痛,产奶量减少,奶中有絮状物,SCC 急剧上升,超过 200 万个/mL。石蜡组织切片显示病理变化:乳腺组织结构松散,乳腺间质发生水肿,细胞间连接空隙增大,乳腺上皮细胞萎缩,腺泡腔变大,乳腺腔内可见脱落的乳腺上皮细胞、多形核中性粒细胞、巨噬细胞等聚集。结合临床症状表现和实验室指标检测结果确定构建奶牛链球菌型乳腺炎成功。

### (2) 奶牛链球菌型乳腺炎乳腺组织基因表达特征

Affymetrix 基因芯片结果显示共有差异表达显著基因 136 个,包括 78 个表达上调基因和 58 个表达下调基因。在这些基因中,18 个表达上调的基因 *CD34*、*SDC4*、*CDH5*、*APLN*、*HTR2B*、*ACTN2*、*CACNA1A*、*CD55*、*DCP1A*、*ELMO1*、*GALNTL4*、*GANO1*、*HTR2B*、*LOC514818*、

*NOTCH2*、*VWF*、*PROS1*、*ITGB4* 和 11 个表达下调的基因 *EPO*、*CYPEF3*、*ABCA12*、*CCL17*、*LIPG*、*JAG1*、*RPS15*、*TAF4B*、*C4BPB*、*XRCC3*、*FST* 富集到 38 条通路，其中与免疫相关的通路有 13 条，如 JAK-STAT、细胞因子与因子受体作用、造血细胞谱系通路、Notch 信号通路等。

### (3) 奶牛链球菌型乳腺炎组织的 miRNA 表达谱分析

miRNA 表达谱分析显示，链球菌组和对照组分别得到 18,535,913 和 20,847,000 条干净序列。链球菌组共有 373 个的已知和 399 个新的 miRNA，对照组有 358 个已知和 232 个新的 miRNA。差异表达显著的 miRNA 共 35 个，其中表达上调 miRNA 10 个(miR-122、miR-223、miR-16a、miR-2284k、miR-2484、miR-451、miR-383、miR-486、miR-2332、miR-326)，表达下调 miRNA 25 个(miR-378b、miR-145、miR-136、miR-26a、miR-33a、miR-335、miR-3660、miR-146a 和 miR-206 等)。35 个差异表达 miRNAs 共预测到 18,801 个靶基因，靶基因位点数 82,832。GO 分析表明预测靶基因的分子功能涉及生物过程的主要富集在刺激应答、信号、生物调节过程、细胞死亡、免疫过程上；涉及分子功能的主要富集在结合和转导上。KEGG 分析显示其主要富集于与免疫相关的通路如 RIG-样受体信号通路、细胞质 DNA 感受通路、Notch 信号通路等。

### (4) miR-122 靶向 *EPO* 3'UTR 的验证

*EPO* 为 miR-122 的预测靶基因，利用 pmir-RB-REPORT<sup>TM</sup>Vector 成功构建出 *EPO* 3'UTR 野生型载体和突变型载体，与 miR-122mimic 共转染 293T 细胞，利用双荧光素酶报告基因系统证实 miR-122 与 *EPO* 3'UTR 存在作用靶位点(ACACTCC)，表明 miR-122 靶向调控 *EPO* 的表达。

### (5) 奶牛原代乳腺上皮细胞的培养及转染条件确定

纯化的奶牛原代乳腺上皮细胞，聚集成岛屿状生长，具有典型的铺路石和鹅卵石形状，细胞生长曲线呈“S”形，符合一般细胞生长的规律。实时荧光定量法检测到乳腺上皮细胞成功表达  $\beta$  酪蛋白 mRNA，表明此方法获得的乳腺上皮细胞可用于后续的实验研究。经不同转染浓度与转染试剂用量的组合试验，最终确定细胞转染条件为转染浓度 100nM，转染试剂 1 $\mu$ L(96 孔板)。

### (6) miR-122 过表达和抑制表达对 *EPO* 及 JAK-STAT 通路基因表达影响

将 miR-122 mimic 转染入奶牛乳腺上皮细胞 48h 后，miR-122 表达量显著升高，显著降低 *EPO* 表达量，JAK-STAT 通路基因中 *EPOR*、*JAK2*、*STAT5A*、*STAT5B* 和 *Bcl-2* 的表达量均下调，且 *Bcl-2* 下调显著。miR-122 inhibitor 转染入奶牛乳腺上皮细胞 48h 后，*EPO*、*EPOR*、*JAK2*、*STAT5A* 表达量上调、*STAT5B* 表达量显著上调。

**关键词：**奶牛；链球菌；乳腺炎；基因；microRNA；miR-122；*EPO*；JAK-STAT 通路

## Abstract

Mastitis is the most common disease in dairy cows. It causes serious economic losses as well as troubles long-term developments of the dairy industry all over the world. Mastitis was mainly caused by pathogenic bacteria invaded into the mammary gland tissue. *Streptococcus* is one of the main pathogenic bacteria. *Streptococcus* is Gram-positive bacterium with shape of spherical or oval and it grows in chains or pairs. *Streptococcus agalactiae* (*S. agalactiae*) causes subclinical mastitis from 11% to 43% in dairy cows. Dairy cows have low resistance and self-cure ration to this infection. Antibiotics are often used to treat mastitis. However *S. agalactiae* has drug resistance from 50% to 100% for Penicillin G, Amoxicillin, Ampicillin, and so on. Understanding the pathophysiological process and the host immune response to mastitis in mammary tissue are very important for developing new strategies to control or prevent mastitis.

MicroRNA (miRNA) is a kind of single stranded non-coding RNA about 22 oligonucleotides. MiRNA can regulate more than 60% of the encoding protein genes involved in cell growth, proliferation, apoptosis, and immune response and so on. The characteristics of miRNAs expression are tissue specificity and time-series. Studying the differentially expressed miRNAs in mammary gland tissue during the process of immune response will help to understand the mechanism of the body's immune response on the molecular level and provide new methods to control mastitis. In this study, we constructed dairy cows' *S. agalactiae* mastitis model, used Affymetrix gene chip to get differentially expressed genes and then analyzed pathways related to immune. At the same time, we used Solexa sequencing technology to establish two small RNA libraries and analyze differentially expressed miRNAs. Potential target genes of these differentially expressed miRNAs were analyzed by GO and KEGG pathways. According to the analytical results of the two expression profiles, we adopted double luciferase reporter gene system to validate the relationship of miR-122 and *EPO*. Then we transfected miR-122 mimic and miR-122 inhibitor into mammary epithelial cells and measured the expression of *EPO* and genes involved in JAK-STAT signal pathway by real-time fluorescence quantitative technique.

The research results were shown as following:

### (1) Induction of *S. agalactiae*-type mastitis

Twenty-four hours following the *S. agalactiae* challenge, the test udders exhibited clinical symptoms including redness, swelling, pyrexia, hardness and pain. The milk SCC of the test quarters increased rapidly ( $>2,000,000$  cells/ml). In contrast, the SCC from the control udders was normal. The bacteria detected in the test milk samples were only *S. agalactiae*. Furthermore, the biopsy of the infected mammary gland tissues stained with haematoxylin and eosin was demonstrated pathological changes compared with the control. Obvious lesions appeared in the infected udders, the mesenchyme was swollen, parts of the lumen were atrophied, the mammary epithelial cells were loosely connected, and the intercellular gap was increased. Desquamated mammary epithelial cells, polymorphonuclear neutrophils, macrophages, lymphocytes and other inflammatory cells were concentrated in the lumen. All these results showed that *S. agalactiae* mastitis was induced successfully.

## **(2) Expression profiles of genes from bovine mammary glands in response to *S. agalactiae*-induced mastitis**

Affymetrix gene microarray results showed a total of 136 significant differentially expressed genes were identified in the test group compared to the control group, including 78 up-regulated genes and 58 down-regulated genes. Among these genes, 18 up-regulated genes including *CD34*, *SDC4*, *CDH5*, *APLN*, *HTR2B*, *ACTN2*, *CACNA1A*, *CD55*, *DCPIA*, *ELMO1*, *GALNTL4*, *GANO1*, *HTR2B*, *LOC514818*, *NOTCH2*, *VWF*, *PROS1*, *ITGB4* and 11 down-regulated genes including *EPO*, *CYPEF3*, *ABCA12*, *CCL17*, *LIPG*, *JAG1*, *RPS15*, *TAF4B*, *C4BPB*, *XRCC3* and *FST* were involved in 38 pathways, including 13 immune related pathways such as JAK-STAT, Cytokine-cytokine receptor interaction, Complement and coagulation cascades, Hematopoietic cell lineage, Notch signal pathway and so on.

## **(3) Expression profiles of miRNAs from bovine mammary glands in response to *S. agalactiae*-induced mastitis**

The miRNA expression profile results showed that a total of 18,535,913 and 20,847,000 effective reads were obtained from the test and control groups, respectively. In total, 373 known and 399 novel miRNAs were detected in the test group, and 358 known and 232 novel miRNAs were uncovered in the control group. A total of 35 differentially expressed miRNAs were identified in the test group compared to the control group, including 10 up-regulated miRNAs (miR-122, miR-223, miR-16a, miR-2284k, miR-2484, miR-451, miR-383, miR-486, miR-2332, miR-326) and 25 down-regulated miRNAs (miR-378b, miR-145, miR-136, miR-26a, miR-33a, miR-335, miR-3660, miR-146a and miR-206, etc). The RNAhybrid software predicted

18,801 targets genes of these 35 miRNAs. Furthermore, GO analysis demonstrated that target genes' molecule functions were focused on stimulate response, signal, biological regulation, cell killing and immune. KEGG analysis demonstrated that the predicted targets were enriched in several immune response and signal transduction pathways, including the RIG-I-like receptor signalling pathway, cytosolic DNA sensing pathway and Notch signal pathway.

#### **(4) Validation of miR-122 targeting *EPO* 3'UTR**

According to the result that *EPO* was the predicted target gene of miR-122, wild and mutant sequences of bovine *EPO* gene 3'UTR were inserted into the pmiR-RB-REPORT<sup>TM</sup> vector. miR-122 mimic with wild or mutant veter were transfected into 293T cells. The two reporter genes expression levels were tested using the ELISA instrument. The results showed that *EPO* gene was the target gene of miR-122 and the targeted sequence was ACACTCC.

#### **(5) Construction of Bovine Primary Mammary Epithelial Cells Culture and determined transfection conditions**

Purified primary mammary gland epithelial cells formed island-like and grew with typical type of slabstone and cobblestone. Primary mammary gland epithelial cells growth curve was "S" shape and consistened with general rule of cell growth. Mammary epithelial cells expressed  $\beta$ -casein mRNA successfully. The final transfection condition were 100nM FM-siRNA with 1 $\mu$ L transfection reagent for 96- well plates.

#### **(6) Effect of miR-122 on *EPO* and JAK-STAT pathway genes expression**

Transfection of the miR-122 mimic into the bovine mammary epithelial cells increased miR-122 expression significantly while reduced *EPO* expression significantly. The expression of *EPOR*, *JAK2*, *STAT5A*, *STAT5B*, involved in JAK-STAT pathway, were down-regulated. *Bcl-2*, as the down-stream gene of *STAT5*, its expression was down-regulated significantly. However, transfection of miR-122 inhibitor into the bovine mammary epithelial cells, *STAT5B* expression increased significantly and *EPO*, *EPOR*, *JAK2*, *STAT5A* expression increased.

**Keywords:** dariy cow; *S. agalactiae*; mastitis; genes; miRNA; miR-122; *EPO*; JAK-STAT pathway

缩略词表  
(Abbreviations)

| 缩写词      | 英文全称                                                               | 中文全称                    |
|----------|--------------------------------------------------------------------|-------------------------|
| BMT      | Beijing Mastitis Test                                              | 北京乳房炎检测法                |
| cDNA     | Complementary DNA                                                  | 互补脱氧核糖核酸                |
| CMT      | California Mastitis Test                                           | 加州乳房炎检测法                |
| EC       | Electrical Conductivity                                            | 电导率                     |
| EPO      | Erythropoietin                                                     | 促红细胞生成素                 |
| FC       | Fold Change                                                        | 倍数变化                    |
| GO       | Gene Ontology                                                      | 基因本体论                   |
| HE       | Hematoxylin-eosin Staining                                         | 苏木精-伊红染色法               |
| HMT      | Hangzhou Mastitis Test                                             | 杭州乳房炎检测法                |
| IMI      | Intramammary Infection                                             | 乳腺内感染                   |
| JAK-STAT | Janus Kinase-signal Transducers and<br>Activators of Transcription | 酪氨酸蛋白激酶-信号传<br>导和转录激活因子 |
| KEGG     | Kyoto Encyclopedia of Genes and Genomes                            | 京都基因与基因组<br>百科全书        |
| pBMECs   | Primary Bovine Mammary Epithelial Cells                            | 牛原代乳腺上皮细胞               |
| PCR      | Polymerase Chain Reaction                                          | 聚合酶链式反应                 |
| PMN      | Polymorphonuclear Leukocyte                                        | 多形核嗜中性白细胞               |
| RISC     | RNA Induced Silencing Complex                                      | 沉默复合物                   |
| SCC      | Somatic Cell Count                                                 | 体细胞数测定                  |
| SMT      | Shanghai Mastitis Test                                             | 上海乳房炎检测法                |
| TLR      | Toll-Like Receptor                                                 | Toll 样受体                |

目 录

摘要 .....I

Abstract ..... III

缩略词索引表 .....VI

目录 .....VII

第一章 文献综述 ..... 1

前言 ..... 1

1 奶牛乳腺炎的研究进展 ..... 1

1.1 奶牛乳腺炎的致病因素 ..... 1

1.2 奶牛乳腺炎的类型及特征 ..... 1

1.3 奶牛乳腺炎的诊断 ..... 2

1.3.1 临床诊断 ..... 2

1.3.2 实验室诊断 ..... 2

1.4 奶牛乳腺炎对奶牛业的影响 ..... 3

1.5 奶牛乳腺的防御反应 ..... 4

1.6 奶牛乳腺炎的治疗 ..... 4

1.6.1 抗生素及中草药 ..... 4

1.6.2 抗性基因 ..... 5

1.7 链球菌型乳腺炎研究进展 ..... 5

1.7.1 链球菌简介 ..... 5

1.7.2 链球菌型乳腺炎 ..... 6

1.7.3 链球菌型乳腺炎动物模型 ..... 6

2 miRNA 的研究进展 ..... 6

2.1 miRNA 的生物学合成 ..... 6

2.2 miRNA 的作用机制 ..... 7

|                               |    |
|-------------------------------|----|
| 2.3 miRNA 的鉴定 .....           | 8  |
| 2.4 miRNA 的功能研究 .....         | 8  |
| 2.4.1 miRNA 靶基因的预测 .....      | 8  |
| 2.4.2 miRNA 靶基因的验证 .....      | 9  |
| 2.5 miRNA 与乳腺炎 .....          | 10 |
| 2.6 miR-122.....              | 10 |
| 3 JAK-STAT 信号通路 .....         | 11 |
| 3.1 JAK-STAT 通路简介 .....       | 11 |
| 3.2 JAK-STAT 通路 与免疫调节 .....   | 12 |
| 3.3 miRNA 与 JAK-STAT 通路 ..... | 12 |
| 3.4 EPO 与 JAK-STAT 通路 .....   | 13 |
| 4 原代乳腺上皮细胞培养研究进展 .....        | 14 |
| 4.1 原代乳腺上皮细胞培养概述 .....        | 14 |
| 4.2 原代乳腺上皮细胞培养方法比较 .....      | 14 |
| 5 本研究的 目的与意义 .....            | 14 |
| 参考文献 .....                    | 15 |
| 第二章 奶牛链球菌型乳腺炎乳腺组织基因表达分析 ..... | 24 |
| 1 材料与 方法 .....                | 24 |
| 1.1 试验动物 .....                | 24 |
| 1.2 菌种复苏 .....                | 24 |
| 1.3 主要试剂与仪器设备 .....           | 24 |
| 1.4 奶牛链球菌型乳腺炎模型的建立 .....      | 25 |
| 1.5 组织样品的采集 .....             | 25 |
| 1.6 样品芯片分析前处理 .....           | 25 |
| 1.6.1 总 RNA 的提取 .....         | 25 |

|                                      |    |
|--------------------------------------|----|
| 1.6.2 总 RNA 的纯化.....                 | 26 |
| 1.6.3 cDNA 第一链和第二链一步法合成.....         | 26 |
| 1.6.4 荧光标记 cRNA 合成与纯化.....           | 26 |
| 1.6.5 cRNA 样品片段化和芯片杂交、洗涤及扫描.....     | 27 |
| 1.6.6 表达谱芯片数据分析.....                 | 27 |
| 2 结果.....                            | 27 |
| 2.1 奶牛链球菌型乳腺炎模型建立.....               | 27 |
| 2.2 样品总 RNA 质控.....                  | 28 |
| 2.3 基因芯片杂交扫描.....                    | 28 |
| 2.4 基因芯片数据处理.....                    | 29 |
| 2.5 差异表达基因.....                      | 30 |
| 2.6 差异表达基因 KEGG 分析.....              | 34 |
| 3 讨论.....                            | 36 |
| 3.1 奶牛链球菌型乳腺炎模型的建立.....              | 36 |
| 3.2 基因芯片差异表达基因与奶牛乳腺炎的相关研究.....       | 37 |
| 4 小结.....                            | 37 |
| 参考文献.....                            | 38 |
| 第三章 奶牛链球菌型乳腺炎乳腺组织 microRNA 表达分析..... | 40 |
| 1 材料和方法.....                         | 40 |
| 1.1 试验动物及链球菌型乳腺炎诱导.....              | 40 |
| 1.2 样品采集及总 RNA 的提取与纯化.....           | 40 |
| 1.3 Solexa 测序构建小 RNA 文库.....         | 40 |
| 1.4 测序结果生物信息学分析.....                 | 41 |
| 1.4.1 小 RNA 长度分布.....                | 42 |
| 1.4.2 样品间小 RNA 公共及特有序列分析.....        | 42 |

|                                              |    |
|----------------------------------------------|----|
| 1.4.3 小 RNA 序列比对注释 .....                     | 42 |
| 1.4.4 已知 miRNA 鉴定与新的 miRNA 预测.....           | 42 |
| 1.4.5 miRNA 差异分析 .....                       | 43 |
| 1.4.6 miRNA 靶基因预测分析 .....                    | 43 |
| 1.4.7 GO 富集分析 .....                          | 43 |
| 1.4.8 KEGG 通路分析 .....                        | 44 |
| 1.5 部分差异表达 miRNA 荧光定量验证 .....                | 44 |
| 1.5.1 miRNA 反转录为 cDNA.....                   | 44 |
| 1.5.2 荧光定量反应.....                            | 45 |
| 2 结果.....                                    | 45 |
| 2.1 数据处理及长度分布 .....                          | 45 |
| 2.2 样品间小 RNA 公共及特有序列分析 .....                 | 47 |
| 2.3 小 RNA 序列比对注释 .....                       | 48 |
| 2.4 候选 miRNA 的预测 .....                       | 50 |
| 2.5 miRNA 的差异分析 .....                        | 50 |
| 2.6 miRNA 荧光定量验证 .....                       | 53 |
| 2.7 对已知差异 miRNA 的靶基因预测及 GO 分析和 KEGG 分析 ..... | 53 |
| 3 讨论.....                                    | 55 |
| 4 小结.....                                    | 56 |
| 参考文献 .....                                   | 56 |
| 第四章 Bta-miR-122 靶向 <i>EPO</i> 的双荧光素酶验证.....  | 60 |
| 1 材料与方法.....                                 | 60 |
| 1.1 主要仪器、试剂和材料.....                          | 60 |
| 1.2 牛 <i>EPO</i> 基因野生型重组载体构建 .....           | 61 |
| 1.2.1 奶牛乳腺组织 RNA 的提取 .....                   | 61 |

|                                                        |    |
|--------------------------------------------------------|----|
| 1.2.2 <i>EPO</i> 基因 3'UTR 片段的 PCR 扩增及纯化.....           | 61 |
| 1.2.3 PCR 产物的双酶切及回收纯化与连接 .....                         | 63 |
| 1.2.4 转化 .....                                         | 63 |
| 1.2.5 菌落 PCR 鉴定 .....                                  | 63 |
| 1.2.6 PCR 产物测序 .....                                   | 64 |
| 1.3 牛 <i>EPO</i> 基因突变型载体构建 .....                       | 64 |
| 1.3.1 突变分段 PCR .....                                   | 64 |
| 1.3.2 突变两段拼接.....                                      | 64 |
| 1.3.3 拼接后 PCR 双酶切、回收纯化及连接 .....                        | 65 |
| 1.3.4 菌落扩大培养提取质粒 .....                                 | 65 |
| 1.4 293T 细胞转染 .....                                    | 65 |
| 1.5 数据处理和分析 .....                                      | 66 |
| 2 结果与分析 .....                                          | 66 |
| 2.1 <i>EPO</i> 基因 3'UTR PCR 扩增.....                    | 66 |
| 2.2 菌落 PCR 产物电泳结果 .....                                | 67 |
| 2.3 阳性克隆测序结果 .....                                     | 67 |
| 2.4 野生型载体突变 .....                                      | 68 |
| 2.5 miR-122 与 <i>EPO</i> 3'UTR 靶位点双荧光素酶报告基因的检测结果 ..... | 68 |
| 3 讨论 .....                                             | 69 |
| 3.1 miRNA 靶基因的预测与鉴定 .....                              | 69 |
| 3.2 miR-122 靶向调控 <i>EPO</i> 基因 .....                   | 70 |
| 4 小结 .....                                             | 70 |
| 参考文献 .....                                             | 70 |
| 第五章 奶牛原代乳腺上皮细胞培养方法的建立及细胞转染条件的优化 .....                  | 72 |
| 1 材料与方法 .....                                          | 72 |

|                                                               |    |
|---------------------------------------------------------------|----|
| 1.1 主要仪器设备与试剂 .....                                           | 72 |
| 1.2 奶牛乳腺上皮细胞原代培养 .....                                        | 73 |
| 1.3 乳腺上皮细胞的纯化与传代 .....                                        | 73 |
| 1.4 乳腺上皮细胞形态观察 .....                                          | 73 |
| 1.5 乳腺上皮细胞的生长计数 .....                                         | 73 |
| 1.6 乳腺上皮细胞的冻存与复苏 .....                                        | 74 |
| 1.7 乳腺上皮细胞 $\beta$ 酪蛋白基因( <i>CSN2</i> )表达检测 .....             | 74 |
| 1.8 转染条件的优化 .....                                             | 76 |
| 2 结果 .....                                                    | 76 |
| 2.1 乳腺上皮细胞原代培养 .....                                          | 76 |
| 2.2 乳腺上皮细胞形态观察 .....                                          | 78 |
| 2.3 乳腺上皮细胞生长曲线 .....                                          | 78 |
| 2.4 $\beta$ 酪蛋白基因( <i>CSN2</i> )荧光定量产物电泳结果 .....              | 79 |
| 2.5 不同转染浓度和转染试剂量组合的转染效果比较 .....                               | 79 |
| 3 讨论 .....                                                    | 80 |
| 3.1 乳腺上皮细胞体外培养 .....                                          | 80 |
| 3.2 细胞转染影响因素 .....                                            | 82 |
| 4 小结 .....                                                    | 82 |
| 参考文献 .....                                                    | 83 |
| 第六章 miR-122 过表达和抑制表达对 <i>EPO</i> 及 JAK-STAT 通路部分基因的表达影响 ..... | 85 |
| 1 材料与方法 .....                                                 | 85 |
| 1.1 仪器与试剂 .....                                               | 85 |
| 1.2 miR-122 mimic 和 miR-122 inhibitor 转染细胞 .....              | 85 |
| 1.3 乳腺上皮细胞转染 miR-122mimic 后 miR-122 的表达检测 .....               | 86 |
| 1.3.1 细胞 miRNA 的反转录 .....                                     | 86 |

1.3.2 miR-122 的表达实时荧光定量反应..... 86

1.4 *EPO*、*EPOR*、*JAK2*、*STAT5A*、*STAT5B*、*Bcl-2* 基因的实时荧光定量反应..... 87

1.5 数据处理和分析 ..... 87

2 结果与分析 ..... 87

2.1 乳腺上皮细胞转染 mimic 后 miR-122 的表达变化 ..... 87

2.2 miR-122 过表达对 *EPO* 及 JAK-STAT 通路基因 *EPOR*、*JAK2*、*STAT5A*、*STAT5B*、*Bcl-2* 表达的影响 ..... 88

2.3 miR-122 抑制表达对 *EPO* 及 JAK-STAT 通路基因 *EPOR*、*JAK2*、*STAT5A*、*STAT5B*、*Bcl-2* 表达的影响 ..... 89

3 讨论 ..... 89

3.1 JAK-STAT 通路与乳腺的关系 ..... 89

3.2 JAK-STAT 通路基因与免疫的关系 ..... 89

3.3 miRNA 与 JAK-STAT 通路的调控关系 ..... 90

3.4 miR-122 靶向调控 JAK-STAT 通路的意义..... 90

4 小结 ..... 91

参考文献 ..... 91

第七章 全文结论及创新点 ..... 94

1 结论 ..... 94

2 创新点 ..... 94

致谢 ..... 95

博士期间发表论文 ..... 96

扬州大学学位论文原创性声明和版权使用授权书 ..... 97

# 第一章 文献综述

## 前言

奶牛乳腺炎是奶牛乳腺组织对因感染、外伤或某些化学刺激而出现的炎症反应状态，以促进伤口愈合和恢复乳腺正常功能。奶牛乳腺炎是奶牛最常见的高发疾病，也是长期困扰世界奶牛业发展的重要疾病<sup>[1-2]</sup>。据世界奶业协会统计，目前全世界约有 2.2 亿头奶牛，其中约有 30% 的奶牛患有乳腺炎<sup>[3]</sup>。Gunawardana 等调查发现在 Sri Lanka 的中心省份的牛场，临床和亚临床的乳腺炎流行率达 48%，与此前调查发现的亚洲南部和东南部的情况相似<sup>[4]</sup>。我国奶牛乳腺炎发病率为 20%~70%，每年因乳腺炎所造成的经济损失超过了 50 亿元<sup>[5]</sup>；在美国超过 1/3 的奶牛受到乳腺炎影响，每年的经济损失超过 20 亿美元<sup>[6]</sup>；在印度每年仅临床乳腺炎的损失就超过 0.48 亿卢比<sup>[7]</sup>；奶牛乳腺炎在世界范围内造成的经济损失每年高达 350 亿美元<sup>[8]</sup>。鉴于奶牛乳腺炎对奶牛产业造成重大经济损失的影响，奶牛乳腺炎依然是当前研究的重点和热点。

## 1 奶牛乳腺炎的研究进展

### 1.1 奶牛乳腺炎的致病因素

奶牛乳腺炎的致病因素较多，包括病原菌、遗传、胎次、泌乳、饲养管理(营养、环境)等都可导致乳腺炎，但最主要的还是病原菌因素，包括细菌、酵母、真菌和藻类在内的至少有 137 种病原菌能够引起奶牛乳腺炎，基本覆盖了微生物系统发育谱<sup>[9]</sup>。病原体的种类和其毒力因素是影响奶牛乳腺内感染(intramammary infection, IMI)结果的最重要的一个因素<sup>[10]</sup>。这些病原菌按其传染方式和场所分为接触传染性病原菌和环境性病原菌两类。接触传染性病原菌主要生活和繁殖在牛乳腺表面和乳腺内，在挤奶时通过挤奶员的手、毛巾、挤奶器具等的接触而在奶牛个体间传播。这类病原菌主要有无乳链球菌，停乳链球菌和金黄色葡萄球菌，占整个乳腺炎发病率的 80%~90%<sup>[11]</sup>。环境病原菌主要在奶牛养殖厂周围环境中的粪便、污水、泥土等中生活和繁殖。当奶牛接触到这些物质时引发感染而发病。这类病原菌主要有大肠杆菌、乳房链球菌和化脓性棒状杆菌等。此外一些真菌如念珠球菌、酵母样芽状菌和胞浆菌等和病毒也能引起乳腺炎。

### 1.2 奶牛乳腺炎的类型及特征

根据乳腺炎发病的临床症状程度分为临床乳腺炎和亚临床乳腺炎<sup>[12]</sup>。临床乳腺炎根据发病的程度分为急性乳腺炎和慢性乳腺炎。革兰氏阴性菌如大肠杆菌，常造成牛乳腺的急性炎症反应和严重的临床症状。急性临床乳腺炎临床可见发病乳腺红肿、发热、肿块和触

痛。急性乳腺炎治疗不彻底或是隐性乳腺炎长期未治愈可转为慢性乳腺炎。患病奶牛所产乳汁体细胞数急剧增加,这是临床型乳腺炎典型的特征,基于此特征有人把乳腺炎定义为感染乳腺乳汁中的白细胞计数显著增加的一种疾病。亚临床乳腺炎的临床症状不明显,肉眼无可见的红肿等临床症状,但乳汁中体细胞数显著增加。革兰氏阳性细菌如金黄色葡萄球菌和停乳链球菌,造成的乳腺炎症状较轻,往往是亚临床乳腺炎<sup>[13-14]</sup>。

### 1.3 奶牛乳腺炎的诊断

#### 1.3.1 临床诊断

患临床性乳腺炎的奶牛,一般表现出一些共性特征:精神不振,易焦躁或嗜睡,食欲下降,采食量减少<sup>[12]</sup>。患病乳区可见显著病理变化:乳头外观红肿、发热、乳腺触摸有硬块,奶牛拒绝触摸;产奶量减少,乳道泌乳不畅,乳汁颜色发黄,无奶香味。根据临床症状变化,可以准确诊断奶牛是否患临床性病乳腺炎,继而采取相应的治疗或其他措施。

#### 1.3.2 实验室诊断

亚临床(隐性)乳腺炎的临床特征不明显,不能依靠临床特征观察确诊,需要通过实验室技术手段加以明确。亚临床乳腺炎的奶牛所产乳汁在体细胞数<sup>[15]</sup>、理化性质(pH、电导率等)表现出差异<sup>[16-17]</sup>,通过测定这些指标,与正常指标相比即可确定是否是亚临床乳腺炎。

##### (1)体细胞数测定(somatic cell count, SCC)

牛奶奶细胞数是指每毫升牛奶中的细胞总数,牛奶中含有的细胞多数是白细胞,通常由巨噬细胞、淋巴细胞、多形核嗜中性白细胞(polymorphonuclear leukocyte, PMN)和少量乳腺组织上皮细胞等组成,约占牛体细胞数的95%。体细胞的组成比例和数值变化反映了牛奶质量及奶牛的健康状况<sup>[18]</sup>。PMN在健康奶牛所产的牛乳中一般为1%~11%,而在乳腺炎奶牛乳汁中可急剧升高至90%以上。体细胞数的增加与奶牛乳腺炎发病关系密切,健康奶牛的乳汁体细胞数一般为20~30万个/mL,患隐性乳腺炎奶牛所产牛奶奶细胞数一般大于50万个/mL<sup>[15-16]</sup>。多个国家以体细胞数作为划分牛奶质量的标准。欧盟、澳大利亚和新西兰要求生乳SCC低于40万个/mL,美国农业部规定SCC大于75万个/mL的生乳不得用于加工市售乳品如巴氏奶等。国标《食品安全国家标准 生乳》(GB 19301-2010)对SCC未作规定,国内几家乳品加工企业收购的生乳要求SCC低于60万个/mL<sup>[19]</sup>。

SCC常用的测定方法包括直接法和间接法。直接法主要是人工或电子显微镜检法:取一定量的奶样,加入显色剂,涂抹玻片再人工或仪器显微镜计数。间接法最早是由Schalm于1957年提出的加州细胞数测定法(California mastitis test, CMT)<sup>[20]</sup>,其原理是利用牛奶中的体细胞在碱性(氢氧化钠, NaOH)条件下,与表面活性剂如十二烷基磺酸钠发生反应,体细胞被破坏,释放DNA,产生沉淀或形成凝胶,且体细胞数越多,沉淀或凝胶越大。而

后在 CMT 方法的基础上, 发展出 BMT(Beijing mastitis test, 北京乳房炎检测法)<sup>[21]</sup>、SMT(Shanghai mastitis test, 上海乳房炎检测法)<sup>[22]</sup>、HMT(Hangzhou mastitis test, 杭州乳房炎检测法)等<sup>[23]</sup>。间接法测定 SCC 方便快捷, 适用现场和实验室检测, 应用范围较广泛。

### (2)理化指标测定

pH: 正常乳汁呈微酸性, pH 在 6.5~6.8, 发生乳腺炎的乳汁 pH 升高, 原因在于炎症改变了毛细血管的通透性, 使得血液成分进入乳汁中, 改变了乳汁 pH, 使其向血液 pH(7.4)靠拢<sup>[16]</sup>。

电导率(electrical conductivity, EC): 正常乳汁中含有  $\text{Na}^+$ 、 $\text{Cl}^-$ 、 $\text{HCO}_3^-$ 等离子, 发生乳腺炎时乳汁中的离子浓度增加, 从而引起 EC 增加。有研究认为 EC 与 SCC 间有正相关性, 并建立两者间的拟合曲线关系, 相关性可达 0.9334<sup>[17]</sup>。

酶和蛋白: 乳腺炎的发生导致乳中相关酶的活性增大, 如乳酸脱氢酶、乳酸过氧化物酶、碱性磷酸酶等, 同时一些蛋白如热休克蛋白含量发生变化。测定相关的酶活和蛋白的含量即可对乳腺炎做出评定<sup>[24]</sup>。

### (3)病原微生物检测

利用细菌培养方法取奶样进行接种、分离、鉴定单个菌落, 一直是检测乳中病原菌的标准方法。分子生物学技术的兴起和快速发展推动了 PCR 技术在微生物检测的应用, 并建立了相应的检测标准, 全自动微生物鉴定仪的出现和应用丰富了微生物的检测手段<sup>[25]</sup>。

## 1.4 奶牛乳腺炎对奶牛业的影响

乳腺炎对奶牛产业的影响包括: (1)奶牛产奶量的下降, 包括患病奶牛产奶量的直接减少和治疗期间的弃奶。奶牛乳腺炎可造成奶牛第一个泌乳期产奶量下降 9%, 第二个泌乳期产奶量减少达 11%<sup>[26]</sup>; 患病奶牛在治疗前后的一段时间内所产的牛奶因奶品质的降低, 不能加工使用, 只能弃去。(2)牛奶品质的降低。乳腺炎对乳品质的影响主要是改变乳汁颜色、气味和乳中营养成分的比例。乳腺炎乳汁外观呈现黄色或血色, 无天然乳香味而代之以异味, 奶液分布不均或出现絮状或凝固块。乳腺炎奶的乳脂率降低并含有大量游离脂肪酸, 不饱和脂肪酸的百分比低于正常乳, 导致产生脂肪氧化味、涩味、苦味等不良气味。相对于健康奶牛所产的牛奶呈弱酸性, 乳腺炎牛奶大多呈碱性。正常奶中的体细胞数一般低于  $1 \times 10^5$  个/mL, 而乳腺炎奶中的体细胞数显著增加, 一般大于  $5 \times 10^5$  个/mL, 增加的体细胞以中性粒细胞为主。隐性乳腺炎虽临床症状不明显, 但奶品质的降低对后续奶制品的加工有影响。(3)奶牛提前淘汰。患病奶牛因治疗费用增加和易复发乳腺炎等因素, 往往被提前淘汰, 以减少经济损失。据统计在美国、芬兰、挪威和瑞典因乳腺炎和乳腺健康问题而淘汰的奶牛占淘汰奶牛的 26.5%、35%、19%和 22%<sup>[27]</sup>。

## 1.5 奶牛乳腺的防御反应

外界病原微生物侵入奶牛乳腺主要通过乳头的损伤处侵入乳腺,造成乳腺内的感染,或在挤奶操作过程中因多余空气吸入挤奶器,将存在于奶中或是乳头末端的病原菌(金葡萄菌和链球菌等)带入乳头管和乳池而导致乳腺的感染。此外病原微生物也可经血液循环侵入乳腺而造成感染。病原菌侵入乳腺后在乳头管内层或下部的乳腺组织内增殖,并从感染区域向乳管内排出,随入侵的深入继而感染其它乳腺部位。

乳腺的乳头管是乳腺防御病原菌的第一道防线<sup>[28]</sup>。在非挤奶期,乳头管的括约肌处于紧闭状态,阻挡病原菌的入侵。乳头管黏膜的角化上皮细胞和黏膜可分泌溶菌霉素和具有杀菌作用的角蛋白,其内部由抗菌脂类和蛋白质组成的防护体系,乳头管的近端可产生局部抗体和淋巴因子。但当乳头管受损伤时,乳头管处于开放或半开放状态,为病原菌的长驱直入留下了可乘之机。

当病原菌侵入乳腺组织,通过产生内毒素而破坏乳腺组织,引起泌乳细胞水肿、死亡。乳腺在受到病原菌的刺激后,释放多种活性物质,吸引血液中的白细胞游走到乳汁中。嗜中性粒细胞首先穿过实质组织游走至乳头远端,与乳头管的防御功能相互协作,角蛋白将细菌粘附,体液免疫因子抑制细菌活性,而后被嗜中性粒细吞噬和杀灭。同时血液中的液体和凝集因子渗入感染乳腺,稀释细菌毒素,修复受损组织,产生炎症反应<sup>[29-30]</sup>。

在炎症反应中,乳腺免疫系统被激活以消灭病原体。乳腺防御系统包括结构上的,细胞的和可溶性因子协调参与,对调控乳腺对感染的抗性和易感性是至关重要的。发生乳腺炎后,奶中的体细胞数(中性粒细胞)增加。一些因子也能增强吞噬细菌的能力。而一些细菌也能调节乳腺免疫系统细胞中细胞因子的产物,这些产物调节宿主的自然免疫应答。病原菌和上皮细胞、内皮细胞、乳腺免疫系统细胞的互作关系复杂。因此,研究和明确乳腺对不同病原体的自然和适应性免疫应答的特点对了解乳腺炎的病理学,制定有效的治疗和控制乳腺炎的措施是不可缺少的。

## 1.6 奶牛乳腺炎的治疗

### 1.6.1 抗生素及中草药

奶牛乳腺炎在世界范围内都是高发性的,即使牛群制定了乳腺炎的防控计划,也往往防不胜防。一般地对由细菌引起的奶牛乳腺炎的治疗,抗生素具有良好的疗效。但长期使用抗生素,一方面抗生素容易在牛奶中残留,另一方面耐药菌株逐渐增多,如使用青霉素治疗,最初仅产生 8%的耐药菌株,但随使用时间的增加,耐药菌株已达 77%,如果这种状况不改变,再继续使用青霉素将完全失去效果<sup>[31]</sup>。鉴于抗生素的残留和耐药性,利用中草药来治疗乳腺炎是一种改良措施。具有抗菌、抗炎、消肿等功效的中草药如王不留行、

当归、川芎、蒲公英、川红花、白术、金银花等是常选用的中草药,通过不同组方筛选出治疗效果好的中草药配比<sup>[32-33]</sup>。随着化学分析技术的进步,已开始对中草药中的有效成分提取和验证其对乳腺炎的治疗效果,如从蒲公英中提取的蒲公英甾醇作为蒲公英中重要的有效成分之一,已被证实具有抗炎、抗菌、抗肿瘤作用,通过抑制 LPS 诱导的炎性细胞因子分泌及 NF- $\kappa$ B、MAPKs 信号通路激活来发挥其抗炎作用<sup>[34]</sup>。绿原酸通过对 TLR4 和 NF- $\kappa$ B 信号通路的激活的抑制作用,实现对 LPS 诱发的小鼠乳腺炎损伤的保护作用<sup>[35]</sup>。尽管中草药及其有效成分对乳腺炎有一定的疗效,但中草药的成分复杂,治疗机理未完全明确,对奶牛及乳品的影响还有待于进一步研究。

## 1.6.2 抗性基因

近十几年来,利用基因芯片技术和转录组测序开展乳腺对炎症的免疫应答机制研究,寻找和筛选具有抗乳腺炎的基因是寻找新的治疗和控制乳腺炎的方法之一。Im 等人利用乳腺上皮细胞系 Mac-T 细胞,经 LTA 和 PGN(金葡菌细胞壁成分)处理后检测基因表达谱变化,一共检测到 2019 个差异表达基因,其中上调基因 801 个,与炎症介导相关的基因有 14 个,如 *CTGT*、*CCDC-80*、*CSRP-2*、*PC-TP*、*TGF- $\beta$ 2*、*TF-4*、*LMO-4*,与细胞内分子信号通路相关的基因有 22 个,与转录因子相关基因 15 个;下调基因 1208 个,与炎症相关的基因中有 17 个,如 *GPNMB*、*MMP-1*、*CD36*、*CCR7*、*RENBP*、*MMP-9*、*CEACAM1*、*IL13RA*<sup>[36]</sup>。Xiu 等分别用金葡菌、大肠杆菌和肺炎克雷伯菌感染原代乳腺上皮细胞(pBMECs),采用转录测序方法研究发现差异表达的基因主要集中在氧化磷酸化、NOD 样受体信号通路及细胞凋亡,跟免疫相关可作为抗性的基因包括 *NRF1*、*IL8*、*CXCL5*、*PDCD2L*、*RAB3A*、*RAB1B* 等<sup>[37]</sup>。Moyes 等利用基因芯片研究链球菌型乳腺炎的免疫应答机制,确定 2,102 个基因差异表达,1,082 个基因上调,主要参与免疫应答反应,如 *IL6*、*TNF*、*IL8*、*IL10*、*SELL*、*LYZ* 和 *SA43*<sup>[38]</sup>。

## 1.7 链球菌型乳腺炎研究进展

### 1.7.1 链球菌简介

链球菌属革兰氏阳性菌,呈球形或卵圆形,直径 0.6~1.0 $\mu$ m,多数呈链状排列,短者 4~8 个细菌组成,长者有 20~30 个细菌组成。链的长短与菌种及生长环境有关,在液体培养基中形成链状排列比在固体培养基中形成的链长。奶牛上引发乳腺炎的链球菌主要是无乳链球菌(*Streptococcus agalactiae*, *S. agalactiae*)、停乳链球菌(*Streptococcus dysgalactiae*, *S. dysgalactiae*)和乳房链球菌(*Streptococcus uberis*, *S. uberis*)三种<sup>[39-40]</sup>。

### 1.7.2 链球菌型乳腺炎

链球菌是导致慢性乳腺炎的第一大致病菌, 发病率约占 95%, 无乳链球菌是链球菌型乳腺炎的常见和主要的致病菌, 可导致 11%~43% 的感染率<sup>[41-42]</sup>。李宏胜等指出, 在我国因无乳链球菌引起的奶牛乳房炎发病率高达 20%~40%<sup>[43]</sup>。布日额等从内蒙古自治区东部乳腺炎奶中分离鉴定出无乳链球菌约占总样品的 50%<sup>[44]</sup>。王洪海等调查发现大庆地区隐性乳腺炎奶的发病率为 55%, 分离出的病原菌无乳链球菌占 14%<sup>[45]</sup>。奶牛乳腺感染无乳链球菌后的自愈率不高<sup>[46]</sup>, 因此无乳链球菌在奶牛乳房炎的病原菌中占有重要的地位。

### 1.7.3 链球菌型乳腺炎动物模型

利用试验动物建立某种疾病的模型, 是研究疾病发生的过程和变化的常用工具。乳腺炎动物模型最早由 Chandle 在 1970 年建立小鼠的金黄色葡萄球菌模型, 并于次年开展了青霉素治疗乳腺炎的疗效试验<sup>[47]</sup>。此后多位研究人员采用这种方法对乳腺炎致病机理和治疗预防展开了研究, 金葡菌型乳腺炎模型是目前研究相对较多的。张宝君等<sup>[48]</sup>、朱立力等<sup>[49]</sup>、王亨等<sup>[50]</sup>、Fu 等<sup>[51]</sup>建立小鼠或大鼠的乳腺炎模型; 张静等利用从乳腺炎奶中分离出的金黄色葡萄球菌, 人工诱导 BALB/c 小鼠乳腺炎, 构建小鼠乳腺炎模型<sup>[52]</sup>。牟珊等建立奶山羊乳腺炎模型<sup>[53]</sup>; Yamada 等<sup>[54]</sup>、袁峥嵘<sup>[55]</sup>、李锐<sup>[56]</sup>建立奶牛的金葡菌乳腺炎模型。相比而言, 链球菌型乳腺炎研究的较少, 如伦艳霞等从隐性乳腺炎奶牛的奶样中分离无乳链球菌人工诱发 BALB/c 小鼠乳腺炎, 建立小鼠乳腺炎模型<sup>[57]</sup>。

## 2 miRNA 的研究进展

miRNA 是一类短链非编码 RNA, 长约 22 个核苷酸, 在转录后通过影响 mRNAs 的稳定性和翻译来调节多细胞生物的基因表达。大量的研究表明 miRNA 在哺乳动物上可调节约 60% 的蛋白编码基因, 广泛参与细胞的生理过程如生长、增殖、分化、凋亡和病理过程如癌症、病毒感染等。

### 2.1 miRNA 的生物学合成

1993 年 Lee 等首次在线虫中克隆 lin-4 基因, 并发现 lin-4 并不编码蛋白, 而是产生一种小 RNA 分子, 与其靶基因 lin-14 mRNA 反义互补, 最终导致 lin-14 蛋白质合成减少<sup>[58]</sup>。2000 年, 发现第二个 miRNA 即 let-7, 并证实抑制相关发育基因的翻译, 参与调控线虫发育<sup>[59]</sup>。自此 miRNA 引发了研究的热潮, 随着高通量测序技术的进步和生物信息学分析方法的发展, 新的 miRNA 不断被发现, miRNA 的数量快速增加, 目前 miRbase 数据库 (<http://www.miRbase.org/>)(miRbase Release 21: July 3, 2014)中确定的包括人、鼠、牛等在内

超过 200 个物种的 miRNA 28,645 条，与牛相关的有 1,628 条，匹配茎环结构的有 808 条，成熟 miRNA 793 条。

miRNA 的生物合成过程如图 1-1 所示<sup>[60-64]</sup>：(1)细胞核内的 RNA 聚合酶 II 转录形成多聚腺苷初级转录物(pri-miRNAs)，由 Drosha 核糖核酸酶 III 剪切形成 70nt 茎环发夹结构的 miRNA 前体(pre-miRNAs)；(2)Exportin-5 蛋白将 pre-miRNA 转至核外，由 Dicer 核糖核酸酶切除茎环，形成双链 RNA，在解旋酶作用下分开，形成成熟 miRNA 和反义 miRNA；(3)成熟 miRNA 与 RNA 诱导沉默复合物(RNA induced silencing complex, RISC)中的配体 Argonaute(Ago)家族蛋白偶联，成为特异性决定子，miRNAs 引导 Ago 蛋白借助互补位点靶向 mRNAs，降解 mRNA 或抑制 mRNA 的翻译。

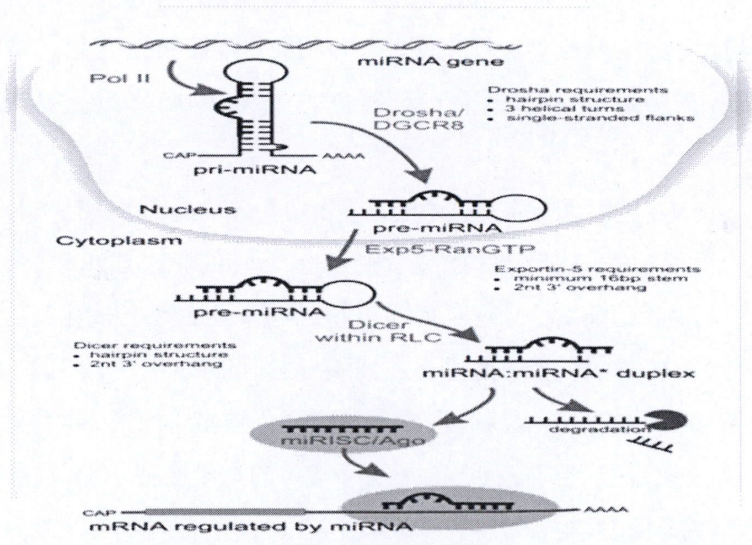

图 1-1 miRNA 生物合成途径(Roslan *et al*, 2011)

Fig.1-1 miRNA biogenesis pathway(Roslan *et al*, 2011)

## 2.2 miRNA 的作用机制

大量的研究表明，miRNA 通过碱基互补方式与靶基因 mRNA 配对使 mRNA 降解或抑制 mRNA 的翻译<sup>[65-68]</sup>。两种作用方式的差别在于，靶基因的抑制表达是通过互补序列的完全匹配引发靶基因 mRNA 降解，减少靶基因的生成量，而翻译抑制并不影响靶基因的 mRNA 的表达量，而是影响 mRNA 翻译为蛋白质，导致蛋白表达水平的降低。植物 miRNA 与其靶基因完全互补配对发挥降解靶基因 mRNA 作用。动物 miRNA 与靶基因 mRNA 并不完全配对，miRNA 5'端存在 2-8 个核苷酸的种子序列，通过种子序列与靶基因 mRNA 互补，允许错配，miRNA 下调基因的表达主要是翻译抑制，使 mRNA 脱腺苷化和降解，或是使 mRNA 断裂(较少)<sup>[68]</sup>。Guo 等对比蛋白生成总体效率与 mRNA 表达量时发现，因 miRNA 下调 mRNA 的表达对蛋白质合成的减少的贡献最多可占 84%，认为 miRNA 降低靶基因的

表达是减少蛋白合成的主要原因<sup>[69]</sup>。miRNA 发挥作用的关键是与靶基因的靶位点结合,从而调控靶基因的表达或翻译。大多数的研究认为靶基因的靶位点一般位于其 3'端非编码区(Untranslation Region, UTR),也有研究发现靶基因靶位点也可能存在于 mRNA 5'UTR,甚至在编码区上,也存在靶位点。Orom 等研究发现 miR-10a 作用于核糖体核蛋白 mRNA 的 5'UTR,并促进其翻译<sup>[70]</sup>。Tay 等发现在大鼠的 *Nanog* 基因和 *Oct4* 基因的 CDS 中分别存在 6 个和 3 个 miR-470 的结合位点,前者同时还存在 2 个 miR-296 的结合位点,这些 miRNAs 在结合位点形成碱基互补配对,可调控大鼠的胚胎干细胞的分化<sup>[71]</sup>。

## 2.3 miRNA 的鉴定

包括 lin4 在内的早期发现和确定的大部分 miRNA,是借助克隆技术测序后鉴定的<sup>[72]</sup>。此种方法通过构建 cDNA 文库后进行 PCR 扩增,用载体连接 PCR 扩增产物后测序,结果精确,可区分单个碱基差异,尤其适用于区分同家族的 miRNA。缺点是易漏掉低表达量的 miRNA。

大量新的 miRNA 的发现与生物技术的进步密切相关,基因芯片技术和高通量测序技术是两种主要的新型技术。基因芯片技术是将经设计特殊的探针与核酸序列杂交,通过激光扫描或荧光检测探针的杂交信号强度变化定量分析基因表达量的变化。基因芯片的灵敏度很高,可达到 1:100,000,差异表达超过 2 倍的基因都可分辨出<sup>[73]</sup>。美国 Affymetrix 公司在 1989 年研制出第一块原位合成的基因芯片,5 年之后推出第一块商业化的基因芯片,自此基因芯片技术快速发展,目前已实现对低分子量目的片段检测,并可区分单个碱基差异<sup>[74]</sup>。应用基因芯片技术已获得多物种、多组织、多生理及多疾病状况下差异表达的基因和 miRNAs<sup>[75-77]</sup>。高通量测序技术是在克隆测序的基础上结合生物信息学分析的技术,与基因芯片相比,无需载体扩增,并可通过聚合酶或连接酶进行体外合成测序,易于发现新的 miRNA,灵敏度很高,对低表达的 miRNA 也能测到。近年应用的 Solexa 新一代测序技术即是基于 HiSeq 高通量测序技术的小 RNA 数字化分析,采用边合成边测序(sequencing by synthesis, SBS),可减少因二级结构造成的一段区域的缺失。并具有所需样品量少,高通量,高精确性,简单易操作的自动化平台和功能强大等特点,一次性获得数百万条小分子 RNA 序列,能够快速全面地鉴定该物种在该状态下的小分子 RNA 并发现新的小分子 RNA,构建样品之间的小分子 RNA 差异表达谱,为小分子 RNA 功能研究提供有力工具<sup>[74,78]</sup>。

## 2.4 miRNA 的功能研究

### 2.4.1 miRNA 靶基因的预测

miRNA 是小片段的 RNA,加之不完全与靶基因序列互补,在已知众多物种全基因的基础上,寻找 miRNA 的靶基因及其靶位点并不是一件容易的事。根据 miRNA 的作用特点,

运用不同的靶基因预测方法预测靶基因的靶位点缩小了靶基因的寻找范围。目前靶基因的预测遵循的原理主要是(1)序列互补性:位于 miRNA 5'端的种子序列(第 2-8nt)与靶基因 3'UTR 可形成互补配对是所有 miRNA 靶基因预测的最重要因素<sup>[66]</sup>。(2)热动力学因素:miRNA 与靶基因形成的配对的自由能越低,其配对的可能性越大<sup>[79]</sup>。除此之外,还可结合利用 miRNA 序列的保守性及其它因素:序列保守性,miRNA 结合位点在多个物种之间如果具有保守性,则该位点更可能为 miRNA 的靶位点;UTR 碱基分布,miRNA 结合位点在 UTR 区的位置和相应位置的碱基分布同样影响 miRNA 与靶基因位点的结合和 RISC 的效率。基于上述原理开发的用于 miRNA 靶基因预测的软件种类较多,常用的包括 TargetScan, RNAhybrid 等可进行在线预测<sup>[79-80]</sup>。

### 2.4.2 miRNA 靶基因的验证

对 miRNA 功能的研究根据其调控的机制不同,使用验证也分为两个方面:对于 mRNA 降解的机制,降解产物可以被逆转录、克隆和测序,并且以推测裂解位点为末端的降解产物占大多数,综合这些实验结果就可确认该 mRNA 就是相应 miRNA 降解的靶 mRNA;对于翻译抑制机制,需要采用报告基因分析系统,预测的基因的 miRNA 互补位点被融合到报告基因的 3'UTR 区,在相应 miRNA 存在和不存在的情形下观察报告基因表达情况,异源报告基因分析的阳性结果提示 miRNA 调控所需的互补元件确实存在于预测基因的 mRNA 上,再结合相应 miRNA 和其互补位点的进化保守性可初步推断该基因是否为 miRNA 的靶基因<sup>[81]</sup>。

miRNA 的过表达研究的方法包括(1)瞬时转染化学合成的前体分子,即将化学合成的 miRNA mimics(模拟物),导入细胞后获得特异 miRNA 的过表达。此种方法可有效进行 miRNA 的分子机制及其功能的研究,但因其分子量小,半衰期短,不适用于进行长效功能研究;(2)非病毒载体瞬时表达载体。通过构建特异 miRNA 重组质粒,瞬时转染细胞而获得过表达方法,此种方法可获得长期高效表达,但对于转染效率低的细胞系或原代培养细胞不适用;(3)腺病毒过表达,其优势在于克服非病毒载体的缺点;(4)逆转录病毒过表达,其优势在于可感染静止细胞及不产生嵌合。

miRNA 的表达抑制研究方法从非基因水平上可以通过化学合成 miRNA 抑制剂,即合成的寡核苷酸分子与特异 miRNA 序列互补,经过多种方法加以修饰以稳定其在细胞水平或体内水平的活性,特异性与成熟 miRNA 分子退火,诱导其降解或形成双链,阻遏其功能的发挥,且这种作用不可逆。从基因水平上可特异针对 miRNA 成熟及作用机制,采用 Dicer 酶抑制、调控位点突变及基因敲除等方法<sup>[61]</sup>。

利用上述miRNA的研究方法,一些在人、小鼠、牛等的先天和适应性免疫调控中起关键作用的miRNAs已经得到确认。Williams等研究表明miR-146a通过靶向*TNF*受体关联因子6(*TRAF6*)和白介素受体关联酶I(*IRAK1*)调控细菌感染的先天性免疫反应<sup>[82]</sup>。Cui等报道石首鱼在感染鳃弧菌后,miR-122通过靶向*TLR14*而参与调控Toll样受体信号通路<sup>[83]</sup>。

## 2.5 miRNA 与乳腺炎

miRNA的表达具有时空性,组织特异性。在生物体正常的生理过程中miRNA参与调控细胞的生命周期,促进生物体正常的生长发育,如最早发现的Lin-4即参与调控线虫发育。乳腺作为哺乳动物重要的组织器官,除具有合成和分泌乳汁的生理功能外,还具有防御病原菌的重要功能。乳腺在受到病原菌的入侵而产生免疫应答反应,在此种状况下,乳腺内的miRNAs表达出现差异,不论是表达上调或下调,这些差异表达的miRNA很可能参与机体的免疫调节过程。Jin等体外试验表明乳腺上皮细胞感染*Escherichia coli* (*E. Coli*)后5个miRNAs(bta-miR-184、miR-24-3p、miR-148、miR-486和let-7a-5p)表达上调,而感染*Staphylococcus aureus* (*S. aureus*) 4个miRNAs (bta-miR-2339、miR-499、miR-23a和miR-99b)表达上调<sup>[84]</sup>。Dilda等研究表明单核细胞感染脂多糖(lipolysaccharide, LPS)and *S. aureus* enterotoxin B后,5个与炎症相关miRNAs(miR-9、miR-125b、miR-155、miR-146a和miR-223)表达上调<sup>[85]</sup>。候钦雷研究表明患乳房炎奶牛的乳腺组织中miR-296、miR-2430和miR-671的表达上调,与靶基因*BoLA-DQA2*剪切体的表达变化一致,提示其对奶牛乳房炎有重要调控作用<sup>[86]</sup>。Chen等发现miR-16和miR-223对NF- $\kappa$ B通路有调节作用,可以作为奶牛乳腺炎的预测分子标记<sup>[87]</sup>。这些研究都证表明miRNAs在牛的免疫调控中起到关键性作用,因此研究探索那些在乳腺炎感染过程中产生适应性变化的miRNA可以帮助我们理解炎症反应有更深入的理解。

## 2.6 miR-122

miR-122 是一个在脊椎动物上非常保守的 miRNA,最初通过克隆在老鼠上确认。miR-122 在肝脏表达较多,研究表明 miR-122 对肝脏的生理学功能如应激反应和脂肪代谢等有重要调控的作用<sup>[88-89]</sup>。近年研究发现 miR-122 在人的癌症中发挥抑制肿瘤作用。Bai等发现 miR-122 可抑制在各种癌症中癌细胞的生成有重要的作用的 *ADAM10* 和 *SRF* 的表达<sup>[90]</sup>,而 miR-122 在初级肝细胞癌(hepatocellular carcinomas, HCCs)中常被抑制。Ma 等研究发现 miR-122 过表达后通过降低 Bcl-W 和/或细胞周期蛋白 Cyclin G1(CCNG1)的表达而诱导细胞凋亡和细胞周期的阻滞<sup>[91]</sup>。

miR-122 除了对肝癌有抑制作用外,对乳腺癌也发挥抑癌作用。Wang 等报道 miR-122 通过调节靶基因 *IGF1AR* 抑制乳腺癌中细胞增殖和肿瘤的形成<sup>[92]</sup>。过表达 miR-122 后显著减少 *IGF1AR* 表达,抑制细胞生长和细胞周期过程,将 *IGF1AR* 沉默后导致显著的细胞生长抑制和受阻,与过表达 miR-122 效果一致。而将 *IGF1R* 过表达则可解除 miR-122 的这种抑制作用。同时验证 *PI3CG*(PI3K 家族成员)为 miR-122 的靶基因,miR-122 是 PI3K/Akt 通路的关键调节因子,因此 miR-122 作为肿瘤抑制因子是通过靶向 *IGF1R* 调节 PI3K/Akt/mTOR/p70S6K 通路而在抑制肿瘤发生过程中发挥作用的。

牛 miR-122 位于 24 号染色体上。miR-122 与牛的相关研究较少,仅见有 Kasimanickam 等研究报道在患子宫炎奶牛血清中 miR-122 表达显著下调<sup>[93]</sup>。

### 3 JAK-STAT 信号通路

#### 3.1 JAK-STAT 通路简介

酪氨酸蛋白激酶-信号传导和转录激活因子(janus kinase-signal transducers and activators of transcription, JAK-STAT)通路是由 Dar-nell 等发现的一条新的快速将细胞外信号传递到细胞核内的信号通路,如图 1-2 所示<sup>[94-95]</sup>。JAK-STAT 信号通路主要包括 3 部分:(1)细胞因子或生长因子受体,如 *EPO*、*IL* 等;(2)酪氨酸激酶(Janus kinase, *JAK*),是一类蛋白酪氨酸激酶,包括 *JAK1*、*JAK2*、*JAK3* 和 tryrosine kinase (*TYK2*),为重要的信号传递分子。它与 *GH*、红细胞生成素、催乳素、白细胞介素(*IL-3*、*IL-5*)、粒-巨噬系集落刺激因子、 $\gamma$ -干扰素( $\gamma$ -interferon,  $\gamma$ -*IFN*)等物质细胞内的信号传递有关。(3)信号转导和转录激活因子(signal transducers and activators of transcription, *STAT*),包括 7 种形式:*STAT1-4*、*STAT5A*、*STAT5B* 和 *STAT6*。*STAT* 是核内转录因子,但在静息细胞中,存在于胞浆。其中 *STAT5* 是在乳腺组织中第一个确定的 *STATs* 家族成员,*STAT5A* 与 *STAT5B* 的氨基酸序列两者有 90% 以上的同源性。*STAT5* 在乳腺的增殖、分化,并在维持泌乳方面发挥重要作用,其中 *STAT5A*(90%)介导的信号转导途径在妊娠期参与乳腺上皮细胞的分化、维持乳腺上皮细胞的生存,在泌乳期参与乳蛋白的合成。

JAK-STAT 通路的激活从肽配体(细胞因子等)与其跨膜受体结合开始。受体形成二聚体并交叉激活受体相关的 *JAK* 激酶,随即磷酸化受体尾部的酪氨酸残基,这些磷酸化的酪氨酸残基的功能是作为细胞质 *STAT* 蛋白潜在的识别位点。磷酸化的 *STAT* 蛋白通过 Src-homology2(SH2)结构域-磷酸-酪氨酸的互作并移位到细胞核中,作为转录激活子诱导表达靶基因,最终引发生物学效应。

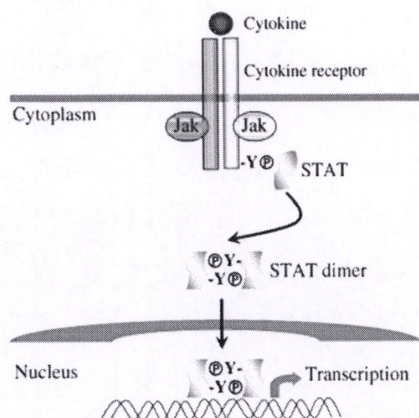

图 1-2 JAK-STAT 信号通路(Ivashkiv, 2004)

Fig.1-2 JAK-STAT signal pathway(Ivashkiv, 2004)

### 3.2 JAK-STAT 通路与免疫调节

JAK-STAT 信号通路调节核与细胞表面受体间的信号传导。*JAK* 的激活刺激细胞增殖、分化、迁移和凋亡，这些细胞活动对维持造血、免疫发育、乳腺发育和泌乳、脂肪分化、第二性征发育和其它生理过程是非常关键的。可预见的是，减弱 JAK-STAT 通路活性的变异将影响这些生理过程<sup>[96]</sup>。相反，组成性的激活或是调控 JAK-STAT 通路的失败将可能造成炎症、红细胞增多、巨畸症和白血病<sup>[97]</sup>。*IL-6* 刺激引发 JAK-STAT 的快速磷酸化，而 *JAK* 的抑制剂则可阻止 *IL-6* 诱导的 JAK-STAT3 的激活。通过抑制 JAK-STAT 通路的活性，有效改善急性胰腺炎(acute pancreatitis, AP)预后，因而可将抑制 *IL-6* 调节的促炎信号通路作为抗炎治疗措施<sup>[98]</sup>。在大鼠痛风性关节炎模型中，利用中药复方铁锁痛风汤下调 JAK-STAT 炎症信号通路中的 *JAK2* 表达量，可以减轻大鼠的关节肿胀程度，以及关节软骨、软组织的炎症程度<sup>[99]</sup>。

### 3.3 miRNA 与 JAK-STAT 通路

近年研究表明多种 miRNA 通过调控靶基因的表达而参与 JAK-STAT 通路的调节。miR-155 在 JAK-STAT1/2 信号通路中具有重要的作用，*STAT1* 作为促凋亡因子和抗感染因子受到干扰素调控。在肝癌细胞中，miR-155 表达量增加，上调干扰素介导的抗病毒基因能够增强细胞的抗感染能力<sup>[100]</sup>。miR-155 在细胞中还可直接作用于细胞因子信号抑制蛋白 1(suppressor of cytokine signaling 1, *SOCS1*)。*SOCS1* 是 JAK-STAT 信号通路的抑制因子之一，可抑制 JAK 蛋白磷酸化和延迟 STAT 蛋白激活。在 HepG2 细胞中，过表达 miR-155 显著抑制 *SOCS1*，进而抑制了乙肝病毒(hepatitis B virus, HBV)基因组的感染，使细胞具有明显的抗感染效果<sup>[101]</sup>。除 miR-155 外，miR-221/222 同样靶向调控 *STAT1/2*<sup>[102]</sup>。miR-125b

对 JAK-STAT 通路的调控作用并不一致, miR-125b 在骨肉瘤中通过直接靶向 *STAT3*, 抑制肿瘤细胞的增殖与迁移, 然而 miR-125b 在胶质瘤中作用于 *STAT3* 激活抑制蛋白, 从而增加 *STAT3* 的表达, 促进癌症细胞的增殖<sup>[103]</sup>。miR-34a 可通过 ERK 和 STAT5 通路发挥抑癌作用<sup>[104]</sup>。在骨肉瘤细胞 osteosarcoma(OS-732)中, *HNF4G* 是 miR-122 的靶基因, miR-122 过表达后抑制 *HNF4G* 而使 PI3K/AKT、JAK/STAT 和 Notch 通路失活, 抑制细胞增殖、迁移, 促进细胞凋亡<sup>[105]</sup>。

### 3.4 *EPO* 基因与 JAK-STAT 的关系

*EPO*(Erythropoietin, 促红细胞生成素), 最初由 Reissman 在 1950 年利用连体鼠试验在鼠血液循环中发现 *EPO*, 其作用是刺激骨髓红细胞增生。*EPO* 早期的研究集中在治疗与贫血、低氧等相关的疾病上<sup>[106]</sup>。近年的研究发现, 除造血组织和细胞外, 很多组织如肝脏、子宫、神经系统、内皮细胞等也表达 *EPO* 及 *EPO* 受体(*EPOR*), *EPO* 的作用也不仅仅局限于造血功能。*EPO* 同 *TNF*(tumour necrosis factor, 肿瘤坏死因子)一样在自然免疫应答中有重要的作用<sup>[107]</sup>。

在自然免疫中, 机体通过模式分子识别外来入侵的病原体等生物, 机体为消灭病原体, 采取“焦土”政策, 将机体感染附近正常的细胞一起杀死, 某些情况下这种“损害”远大于入侵的部位, 而 *EPO* 可以阻止这种损害。在很多动物损伤模型中, *EPO* 在与自然免疫相关的组织处发挥防御保护作用。这些组织包括眼睛, 肾脏, 外周神经, 脊髓和皮肤。不同组织发生损伤后, *EPO* 的保护作用失效时间依组织不同而不同, 肾脏 6h, 大脑 9h, 心脏 16h, 脊髓 72h<sup>[106]</sup>。Sasaki 等发现, 大脑能够产生少量的 *EPO*, 在脑部受到损伤时保护神经细胞, 进一步发现脑部直接注射 rh*EPO* 可以进一步减少损伤体积<sup>[108]</sup>。

*EPO* 的功能需通过 *EPOR* 的激活实现, *EPO* 与 *EPOR* 结合后, 将与受体相连的 *JAK2* 磷酸化激活, 继而引发下游信号通路。与 *JAK2* 相连的信号通路包括 JAK-STAT、JAK-PI3K(磷脂酰肌醇-3-激酶)、JAK-ERKs(胞外信号调节激酶-1,2)、JAK2-Ras-MAPK(有丝分裂原活化蛋白激酶)等<sup>[109-110]</sup>。姚胜研究表明大鼠在烫伤后合并感染金葡菌脓毒症的早期, 机体的肝、肾等组织的 *STAT3* 快速活化, 激活 JAK-STAT 通路。注射 *JAK2* 特异性抑制剂和 *STAT3* 磷酸化抑制剂, 各组织中 *STAT3* 活性不同程度降低, 细胞因子及其蛋白表达也随之减少, 肝功能得到改善, 证实抑制 JAK/STAT 通路的活化可以减轻机体的局部组织的炎症反应, 保护脏器功能<sup>[111]</sup>。

## 4 原代乳腺上皮细胞培养研究进展

### 4.1 原代乳腺上皮细胞培养概述

细胞是除病毒、类病毒和阮粒等外的生物体的基本结构和功能单位。细胞培养是指利用动物组织或细胞,在体外通过建立或模拟体内细胞生长所需的生理环境(适宜的 pH、营养物质等),促使细胞生长繁殖的方式。奶牛乳腺上皮细胞既是泌乳细胞,具有合成和分泌乳汁的生理功能,同时又是重要的免疫调节细胞,建立具有正常生理功能的乳腺原代上皮细胞的体外培养方法,对于研究乳汁的合成与分泌和乳腺的免疫应答机制是非常必要的,一度成为研究的热点<sup>[112]</sup>。乳腺上皮细胞的原代培养成功始于上世纪五十年代。Lasfargues 等在 1957 年利用胶原酶将小鼠乳腺细胞从乳腺组织中消化分离出来,首次实现了乳腺细胞的直接培养<sup>[113]</sup>。1961 年 Ebmer 等首次培养出了牛乳腺细胞,但其易受成纤维细胞影响,传代次数有限<sup>[114]</sup>。1983 年 Schmid 等利用传代乳腺细胞单克隆的方法最先建立牛乳腺细胞系 BMGE,但没有对这些细胞系的生理功能进行检验<sup>[115]</sup>。此后经过 30 多年的发展,乳腺上皮细胞的体外培养已向永生化的方向发展<sup>[116]</sup>。

### 4.2 原代乳腺上皮细胞培养方法比较

目前原代乳腺上皮细胞的培养方法比较成熟,主要有三种方式:酶消化法、组织块法和乳汁分离法<sup>[117]</sup>。在实践中运用较多的是前两种方法。酶消化法和组织块法都是采用新鲜乳腺组织,清洗消毒后除去结缔组织,将乳腺组织剪碎至小于  $1\text{mm}^3$  的肉糜状,酶消化法采用胶原酶、胰蛋白酶等消化肉糜状的组织块,将细胞游离出,再将消化液过滤,离心后得到的细胞进行接种培养和纯化。胰酶消化法对胰酶浓度和消化时间要求严格,不易培养成功。组织块法对操作要求相对简单,但培养纯化乳腺上皮细胞时间较长,耗时耗力。

## 5 本研究的目的与意义

奶牛乳腺炎一直是困扰奶牛养殖业的难题和研究的重点。目前针对奶牛乳腺炎的常规药物治疗易产生药物残留和耐药性的问题,深入研究病原菌致病机理及机体免疫应答机制,是开发各类新的治疗和预防乳腺炎的方法的理论基础。

链球菌乳腺炎在奶牛乳腺炎中占有一定的比例,但链球菌在奶牛上的致病机制并未完全阐述清楚,本研究期望在此方面做一些基础研究工作。通过诱导奶牛链球菌型乳腺炎,获得机体在免疫应答过程中产生的差异表达基因和 miRNA,借助生物信息分析技术,筛选出与链球菌感染免疫相关的基因、miRNA 和免疫调控的通路。阐明在链球菌引发乳腺感染的过程中,机体的相关免疫应答机制:机体如何调控基因和 miRNA 的表达,miRNA 如何通

过调控靶基因而参与哪些免疫相关通路应答。本研究结果将有助于了解奶牛乳腺组织对链球菌感染的免疫应答机制，并为预防和治疗奶牛乳腺炎提供新的思路和策略。

## 参考文献：

- [1] Thompsoncrispi K, Atalla H, Miglier F, et al. Bovine mastitis: frontiers in immunogenetics [J].Front Immunol, 2014, 5:493(1-10).
- [2] Reshi A A, Husain I, Bhat S A, et al. Bovine mastitis as an evolving disease and its impact on the dairy industry[J].Solid State Phenomena, 2015, 7:48-55.
- [3] Miyano H, Haritani M, Sentsui H, et al. Mammary lesions associated with bovine herpesvirus type 4 in a cow with clinical mastitis[J].Journal of Veterinary Medical Science,2004, 66(4):457-460.
- [4] Gunawardana S, Thilakarathne D, Abegunawardana I S, et al. Risk factors for bovine mastitis in the central province of Sri Lanka[J].Tropical Animal Health & Production, 2014, 46(7):1105-1112.
- [5] 刘龙海, 李新圃, 杨峰,等. 奶牛乳房炎综合防控关键技术研究进展[J].中国草食动物科学, 2015, 35(5):56-61.
- [6] Sordillo L M, Streicher K L. Mammary gland immunity and mastitis susceptibility[J]. Journal of Mammary Gland Biology & Neoplasia, 2002, 7(2):135-146.
- [7] Sinha M K & Thombare N N. Incidence and impacts of clinical mastitis in dairy cattle farms: case of Maharastra farmers[J].Mpra Paper, 2013.
- [8] 朱江巍, 刘耀川, 张雅为. 奶牛乳房炎病原菌分离及药物敏感性试验[J].黑龙江畜牧兽医, 2016(4):111-113.
- [9] Watts J L.Etiological agents of bovine mastitis[J].Veterinary Microbiology,1988, 16(1):41-66.
- [10] Pearson J K, Mackie D P. Factors associated with the occurrence, cause and outcome of clinical mastitis in dairy cattle[J].Veterinary Record, 1979, 105(20):456-63.
- [11] Harmon R J. Symposium: Mastitis and genetic evaluation for somatic cell count[J].Journal of Dairy Sci, 1994,77:2103-2112
- [12] 王根林, 刘庆华, 江风龙. 奶牛乳房炎及其控制[M].中国农业出版社, 2004
- [13] Bannerman D D, Paape M J, Lee J W, et al. Escherichia coli and *Staphylococcus aureus* elicit differential innate immune responses following intramammary infection[J].Clin Diagn Lab Immunol, 2004, 11(3):463-472.
- [14] Smith K L, Hogan J S. Environmental mastitis[J].Veterinary Clinics of North America Food

Animal Practice, 1993, 9(3):489-498.

[15] Miller R H, Paape M J, Acton J C. Comparison of milk somatic cell counts by Coulter and Fossomatic Counters[J].Journal of Dairy Science, 1986, 69(7):1942-1946.

[16] 冯万字,史同瑞,许腊梅. 奶牛乳房炎的诊断与防制研究进展[J].黑龙江畜牧兽医, 2008(4):79-80.

[17] 方海田, 刘慧燕, 德力格尔桑. 隐性乳腺炎患牛乳汁电导率变化与体细胞数相关关系的研究[J].中国乳业, 2008(1): 317-319

[18] Ma Y, Ryan C, Barbano D M, et al. Effects of somatic cell count on quality and shelf-life of pasteurized fluid milk.[J].Journal of Dairy Science, 2000, 83(2):264-274.

[19] 赵连生, 王加启, 郑楠,等. 牛奶质量安全主要风险因子分析Ⅶ.体细胞数和菌落总数[J].中国畜牧兽医, 2012, 39(7):1-5.

[20] Schalm O W, Noorlander D O. Experiments and observation leading to development of the California Mastitis Test[J].Journal of the American Veterinary Medical Association, 1957, 130(5):199-204.

[21] 李毅, 徐梓杨. 奶牛隐性乳房炎快速诊断技术(BMT)的应用[J].北京农业, 2010(24):9-11.

[22] 宋华容, 李正国, 罗瑞卿,等. 石河子地区奶牛乳房炎病原菌分离鉴定及中药抑菌试验[J].安徽农业科学, 2009, 37(9):4044-4047.

[23] 陈慧珍, 朱平民, 蒋次升. 奶牛隐性乳房炎的诊断研究——HMT 与 CMT 的效能比较[J]. 浙江大学学报:农业与生命科学版, 1984(3):253-259.

[24] Cooray R. Use of bovine myeloperoxidase as an indicator of mastitis in dairy cattle[J]. Veterinary Microbiology, 1994, 42(4):317-326.

[25] 代敏, 彭成, 陈丹丹,等. 全自动微生物分析系统和 16S rDNA 序列分析技术对奶牛乳腺炎病原菌的鉴定[J]. 畜牧与兽医, 2011, 43(9):28-32.

[26] Heikkilä A M, Nousiainen J I, Pyörälä S. Costs of clinical mastitis with special reference to premature culling[J].Journal of Dairy Science, 2012, 95(1):139-150.

[27] Nash D L, Rogers G W, Cooper J B, et al. Heritability of clinical mastitis incidence and relationships with sire transmitting abilities for somatic cell score, udder type traits, productive life, and protein yield[J].Journal of Dairy Science, 2000, 83(10):2350-2360.

[28] Capuco A V, Bright S A, Pankey J W, et al. Increased susceptibility to intramammary infection following removal of teat canal keratin[J].Journal of Dairy Science, 1992, 75(8):2126-2130.

- [29] Céline Riollot P R B P. Differential induction of complement fragment C5a and inflammatory cytokines during intramammary infections with *Escherichia coli* and *Staphylococcus aureus*[J].Clinical & Diagnostic Laboratory Immunology, 2000, 7(2):161-167.
- [30] Bannerman D D. Pathogen-dependent induction of cytokines and other soluble inflammatory mediators during intramammary infection of dairy cows[J].Journal of Animal Science, 2009, 87(13 Suppl):10-25.
- [31] 秦卓明, 徐怀英, 牛钟相. 细菌耐药性研究的新进展[J].中国禽业导刊, 2005(4):12-13.
- [32] 白峰, 王文魁, 王广彬,等. 22 味中草药对 3 种奶牛乳腺炎病原菌的体外抑菌试验[J].中国奶牛, 2010, 28(2):5-7.
- [33] 孙占武, 苏禹刚. 中草药在防治奶牛乳腺炎中的应用[J].中国畜禽种业,2016, 12(1):82-83.
- [34] 伞治豪. 蒲公英甾醇对 LPS 诱导的乳腺炎抗炎作用及调节机制研究[D].吉林大学, 2014.
- [35] 高瑞峰. 绿原酸抗乳腺炎作用及机制研究[D].吉林大学, 2014.
- [36] Im J, Lee T, Jeon J H, et al. Gene expression profiling of bovine mammary gland epithelial cells stimulated with lipoteichoic acid plus peptidoglycan from *Staphylococcus aureus*[J]. International Immunopharmacology, 2014, 21(1):231-240.
- [37] Xiu L, Fu Y B, Deng Y, et al. Deep sequencing-based analysis of gene expression in bovine mammary epithelial cells after *Staphylococcus aureus*, *Escherichia coli*, and *Klebsiella pneumoniae* infection[J]. Genetics & Molecular Research, 2015, 14(4):16948-16965.
- [38] Moyes K M, Drackley J K, Morin D E, et al. Gene network and pathway analysis of bovine mammary tissue challenged with *Streptococcus uberis*, reveals induction of cell proliferation and inhibition of PPAR $\gamma$  signaling as potential mechanism for the negative relationships between immune response and lipid metabolism[J]. BMC Genomics, 2009, 10(1):542-570.
- [39] 白龙, 郝永清, 范利霞,等. 奶牛乳腺炎无乳链球菌的分离鉴定[J].畜牧与饲料科学, 2010, 31(1):96-97.
- [40] 朱战波, 王红, 刘宇,等. 奶牛乳房炎链球菌分离株的鉴定及药敏试验[J].现代畜牧兽医, 2007(12):8-11.
- [41] Trigo G, Ferreira P, Ribeiro N, et al. Identification of immunoreactive extracellular proteins of *Streptococcus agalactiae* in bovine mastitis.[J].Canadian Journal of Microbiology, 2008, 54(11):899-905.

- [42] Zadoks R N, McDougall S, Katholm J, et al. Molecular epidemiology of mastitis pathogens of dairy cattle and comparative relevance to humans[J]. Journal of Mammary Gland Biology & Neoplasia, 2011, 16(4):357-372.
- [43] 李宏胜, 郁杰, 罗金印,等. 奶牛乳房炎研究进展[C].中国畜牧兽医学学会家畜内科学分会 2009 年学术研讨会. 2009:593-601.
- [44] 布日额, 刘娣, 华玉平,等. 通辽地区奶牛乳房炎无乳链球菌的分离与鉴定[J].黑龙江畜牧兽医, 2009(5):76-77.
- [45] 王洪海, 王海霞, 姚伟红,等. 大庆地区奶牛隐性乳腺炎流行病学调查和主要致病菌的分离鉴定[J].现代畜牧科技, 2017(4):9-10.
- [46] Farnsworth R J. Indications of contagious and environmental mastitis pathogens in a dairy herd[C]. Proc 26th Ann Meet Natl Mastitis Counc, 1987, 26:151-155.
- [47] Chandler R L. Experimental bacterial mastitis in the mouse[J].Journal of Medical Microbiology, 1970, 3(2):273-282.
- [48] 张宝君, 崔京春, 张献,等. 金黄色葡萄球菌乳腺感染模型的建立与评价[J].中国预防兽医学报, 2009, 31(5):365-369.
- [49] 朱立力, 王奇惠, 时永强,等. 金黄色葡萄球菌小菌落突变株感染小鼠乳房炎模型的建立[J].中国畜牧兽医, 2015, 42(7):1865-1870.
- [50] 王亨, 余光涛, 顾铭杰,等. 金黄色葡萄球菌诱导大鼠乳腺炎模型的建立[J].中国兽医杂志, 2015, 51(6):7-9.
- [51] Fu Y, Zhou E, Wei Z, et al. Glycyrrhizin inhibits the inflammatory response in mouse mammary epithelial cells and a mouse mastitis model[J].Inflammation, 2015, 38 (1):16-26
- [52] 张静, 郝赞艮. 小鼠乳腺炎模型的建立及肿瘤坏死因子变化的研究[J].黑龙江畜牧兽医, 2014, (19):142-143
- [53] 牟珊, 韩炎森, 雷丽辉,等. 关中奶山羊乳房炎病理模型的建立[J].动物医学进展, 2011, 32(6):51-55.
- [54] Yamada T, Takahashi N, Sugimoto M, et al. The application about mouse model of *Staphylococcus aureus* mastitis in dairy cow[J].China Animal Husbandry & Veterinary Medicine, 2008, 52(12):116-118.
- [55] 袁峥嵘. 金黄色葡萄球菌诱导奶牛实验性乳腺炎研究[D]. 中国农业科学院, 2011.
- [56] 李锐. 应用表达谱芯片技术和 microRNA 测序筛选奶牛金黄色葡萄球菌人工诱导乳腺炎关键基因的研究[D].扬州大学, 2016.
- [57] 伦艳霞, 王娜娜, 王家鑫. BALB/c 小鼠无乳链球菌性乳腺炎模型的建立[J]. 中国奶牛,

2008(1):35-38.

- [58] Lee Y, Ahn C, Han J, et al. The nuclear RNase III Drosha initiates microRNA processing[J]. *Nature*, 2003, 425(6956):415-419.
- [59] Reinhart B J, Slack F J, Basson M, et al. The 21-nucleotide let-7 RNA regulates developmental timing in *Caenorhabditis elegans*[J]. *Nature*, 2000, 403(6772):901-906.
- [60] Gregory R I, Chendrimada T P, Shiekhattar R. MicroRNA biogenesis: isolation and characterization of the microprocessor complex[J]. *Methods in Molecular Biology*, 2006, 342(11):33-47.
- [61] Staregaroslan J, Koscianska E, Kozlowski P, et al. The role of the precursor structure in the biogenesis of microRNA[J]. *Cellular & Molecular Life Sciences Cmls*, 2011, 68(17):2859-2871.
- [62] Yi R, Qin Y, Macara I G, et al. Exportin-5 mediates the nuclear export of pre-microRNAs and short hairpin RNAs[J]. *Genes & Development*, 2003, 17(17):3011-3016.
- [63] Chendrimada T P, Gregory R I, Kumaraswamy E, et al. TRBP recruits the Dicer complex to Ago2 for microRNA processing and gene silencing[J]. *Nature*, 2005, 436(7051):740-744.
- [64] Kramann R, Moeller M J. The next level of complexity: post-transcriptional regulation by microRNAs[J]. *Kidney International*, 2011, 80(7):692-693.
- [65] Brennecke J, Stark A, Russell R B, et al. Principles of microRNA-target recognition[J]. *Plos Biology*, 2005, 3(3):e85.
- [66] Witkos T M, Koscianska E, Krzyzosiak W J. Practical aspects of microRNA target prediction[J]. *Current Molecular Medicine*, 2011, 11(2): 93-109.
- [67] Bartel D P. MicroRNAs: Target recognition and regulatory functions[J]. *Cell*, 2009, 136(2):215-233.
- [68] Filipowicz W, Bhattacharyya S N, Sonenberg N. Mechanisms of post-transcriptional regulation by microRNAs: are the answers in sight?[J]. *Nature Reviews Genetics*, 2008, 9(2):102-104.
- [69] Guo H L, Ingolia N T, Weissman J S, et al. Mammalian microRNAs predominantly act to decrease target mRNA levels[J]. *Nature*, 2010, 466(7308):835-840.
- [70] Orom U A, Nielsen F C, Lund A H. MicroRNA-10a binds the 5'UTR of ribosomal protein mRNAs and enhances their translation[J]. *Molecular Cell*, 2008, 30(4):460-471.
- [71] Tay Y, Zhang J, Thomson A M, et al. MicroRNAs to Nanog, Oct4 and Sox2 coding regions modulate embryonic stem cell differentiation[J]. *Nature*, 2008, 455:1124-1128.

- [72] Fu H, Tie Y, Xu C, et al. Identification of human fetal liver miRNAs by a novel method[J]. *Febs Letters*, 2005, 579(17):3849-3854.
- [73] 王洪水, 侯相山. 基因芯片技术研究进展[J]. *安徽农业科学*, 2007, 35(8):2241-2243.
- [74] 滕晓坤, 肖华胜. 基因芯片与高通量DNA测序技术前景分析[J]. *中国科学C辑:生命科学*, 2008(10):891-899.
- [75] Suchyta S P, Sipkovsky S, Kruska R, et al. Development and testing of a high-density cDNA microarray resource for cattle[J]. *Physiological Genomics*, 2003, 15(2):158-164.
- [76] Yin J Q, Zhao R C, Morris K V. Profiling microRNA expression with microarrays[J]. *Trends in Biotechnology*, 2008, 26(2):70-76.
- [77] Blenkiron C, Goldstein L D, Thorne N P, et al. MicroRNA expression profiling of human breast cancer identifies new markers of tumor subtype[J]. *Genome Biology*, 2007, 8(10): R214.
- [78] Mortazavi A, Williams B A, Mccue K, et al. Mapping and quantifying mammalian transcriptomes by RNA-Seq[J]. *Nature Methods*, 2008, 5(7):621-628.
- [79] Lewis B P, Burge C B, Bartel D P. Conserved seed pairing, often flanked by adenosines, indicates that thousands of human genes are microRNA targets[J]. *Cell*, 2005, 120(1):15-20.
- [80] Krüger J, Rehmsmeier M. RNAhybrid: microRNA target prediction easy, fast and flexible[J]. *Nucleic acids research*, 2006, 34:w451-w454.
- [81] Cai Y M, Yu X M, Hu S N, et al. A brief review on the mechanisms of miRNA regulation[J]. *Genomics, Proteomics & Bioinformatics*, 2009, 7(4):147-154.
- [82] Williams A E, Perry M M, Moschos S A, et al. Role of miRNA-146a in the regulation of the innate immune response and cancer[J]. *Biochemical Society Transactions*, 2008, 36(6): 1211-1215.
- [83] Cui J X, Chu Q, Xu T J. miR-122 involved in the regulation of toll-like receptor signaling pathway after *Vibrio anguillarum* infection by targeting *TLR14* in miiuy croaker[J]. *Fish & Shellfish Immunology*, 2016, 58:67-72.
- [84] Jin W, Ibeaghaawemu E M, Liang G, et al. Transcriptome microRNA profiling of bovine mammary epithelial cells challenged with *Escherichia coli* or *Staphylococcus aureus* bacteria reveals pathogen directed microRNA expression profiles[J]. *BMC Genomics*, 2014, 15(1):181(1-16).
- [85] Dilda F, Gioia G, Pisani L, et al. *Escherichia coli* lipopolysaccharides and *Staphylococcus aureus* enterotoxin B differentially modulate inflammatory microRNAs in bovine monocytes[J]. *Veterinary Journal*, 2012, 192(3):514-516.

- [86] 侯钦雷. 奶牛乳腺组织 miRNAs 表达谱及基因 BOLA-DQA2 剪接体相关 miRNAs 分析[D]. 南京农业大学, 2011.
- [87] Chen L, Liu X, Li Z, et al. Expression differences of miRNAs and genes on NF- $\kappa$ B pathway between the healthy and the mastitis Chinese Holstein cows[J]. *Gene*, 2014, 545(1):117-125.
- [88] Bhattacharyya S N, Habermacher R, Martine U, et al. Relief of microRNA-mediated translational repression in human cells subjected to stress[J]. *Cell*, 2006, 125(6):1111-1124.
- [89] Esau C, Davis S, Murray S F, et al. miR-122 regulation of lipid metabolism revealed by in vivo antisense targeting[J]. *Cell metabolism*, 2006, 3(2):87-98.
- [90] Bai S, Nasser M W, Wang B, et al. MicroRNA-122 inhibits tumorigenic properties of hepatocellular carcinoma cells and sensitizes these cells to sorafenib[J]. *Journal of Biological Chemistry*, 2009, 284(46):32015-32027.
- [91] Ma L, Liu J, Shen J, et al. Expression of miR-122 mediated by adenoviral vector induces apoptosis and cell cycle arrest of cancer cells[J]. *Cancer Biology & Therapy*, 2010, 9(7):554-561.
- [92] Wang B, Wang H, Yang Z. MiR-122 inhibits cell proliferation and tumorigenesis of breast cancer by targeting IGF1R[J]. *Plos One*, 2012, 7(10):e47053.
- [93] Kasimanickam V, Kastelic J. Circulating cell-free mature microRNAs and their target gene prediction in bovine metritis[J]. *Scientific Reports*, 2016, 6:29509.
- [94] Darnell J E, Kerr I M, Stark G R. Jak-STAT pathways and transcriptional activation in response to IFNs and other extracellular signaling proteins[J]. *Science*, 1994, 264:1415-1421.
- [95] Ivashkiv L B, Hu X. Signaling by STATs[J]. *Arthritis Research & Therapy*, 2004, 6(4):159-168.
- [96] Kaushal M N, Chorawala M. The JAK/ STAT signaling pathway[J]. *Journal of Cell Science*, 2012, 117(8):1281-1283.
- [97] Igaz P, Tóth S, Falus A. Biological and clinical significance of the JAK-STAT pathway; lessons from knockout mice[J]. *Inflammation Research*, 2001, 50(9):435-441.
- [98] 陈杏苑, 杨元生, 陈昱,等. JAK-STAT 细胞信号转导通路与急性胰腺炎关系的研究进展[J]. *世界华人消化杂志*, 2015, 23(6):932-937.
- [99] 陈曾凤. JAK-STAT 信号通路在痛风性关节炎发病中的作用及铁锁痛风汤对其防治的研究[D]. 贵阳医学院, 2013.
- [100] Su C, Hou Z, Cai Z, et al. Ectopic expression of microRNA-155 enhances innate antiviral immunity against HBV infection in human hepatoma cells[J]. *Virology Journal*, 2011, 8: 354(1-11).

- [101] Kisseleva T, Bhattacharya S, Braunstein J, et al. Signaling through the JAK/STAT pathway, recent advances and future challenges[J]. *Gene*, 2002, 285(1-2):1-24.
- [102] Zhang C, Han L, Zhang A, et al. Global changes of mRNA expression reveals an increased activity of the interferon-induced signal transducer and activator of transcription (STAT) pathway by repression of miR-221/222 in glioblastoma U251 cells.[J]. *International Journal of Oncology*, 2010, 36(6):1503-1512.
- [103] Liu L H, Li H, Li J P, et al. miR-125b suppresses the proliferation and migration of osteosarcoma cells through down-regulation of STAT3[J]. *Biochemical & Biophysical Research Communications*, 2011, 416(1-2):31-38.
- [104] Dang Y, Luo D, Rong M, et al. Underexpression of miR-34a in hepatocellular carcinoma and its contribution towards enhancement of proliferating inhibitory effects of agents targeting c-MET[J]. *Plos One*, 2013, 8(4):e61054.
- [105] Kong D, Yang W. Knockdown of lncRNA HULC inhibits proliferation, migration, invasion and promotes apoptosis by sponging miR-122 in osteosarcoma[J]. *Journal of Cellular Biochemistry*, 2018, 119(1):1050-1061.
- [106] Kuhrt D, Wojchowski D M. Emerging *EPO* and *EPO* receptor regulators, and signal transducers[J]. *Blood*, 2015, 125(23):3536-3541.
- [107] Cerami A. TNF and EPO: major players in the innate immune response: their discovery[J]. *Annals of the Rheumatic Diseases*, 2012, 71 Suppl 2(4):i55-i59.
- [108] Masuda S, Nagao M, Takahata K, et al. Functional erythropoietin receptor of the cells with neural characteristics. Comparison with receptor properties of erythroid cells[J]. *Journal of Biological Chemistry*, 1993, 268(15):11208-11216.
- [109] Chen C, Sytkowski A J. Erythropoietin activates two distinct signaling pathways required for the initiation and the elongation of c-myc[J]. *The Journal of biological chemistry*, 2001, 276(42):38518-38526.
- [110] 尹晓东, 徐建凯, 吴衍昌,等. EPO/EPOR-JAK2-STAT5 信号传导通路在成釉细胞瘤中表达意义的研究[J]. *现代生物医学进展*, 2013, 13(6):1009-1014.
- [111] 姚胜. 烫伤后金黄色葡萄球菌感染致严重脓毒症时 JAK/STAT 通路的活化及意义[D]. 第三军医大学, 2002.
- [112] Fournier B, Philpott D J. Recognition of *Staphylococcus aureus* by the innate immune system[J]. *Clinical Microbiology Reviews*, 2005, 18(3):521-540.

- [113] Lasfargues E Y. Cultivation and behavior in vitro of the normal mammary epithelium of the adult mouse. II. Observations on the secretory activity[J]. *Experimental Cell Research*, 1957, 13(3):553-562.
- [114] Ebner K E, Hoover C R, Hageman E C, et al. Cultivation and properties of bovine mammary cell cultures[J]. *Experimental cell research*, 1961, 23(2):373-385.
- [115] Schmid E, Franke W W, Grund C, et al. An epithelial cell line with elongated myoid morphology derived from bovine mammary gland. Expression of cytokeratins and desmosomal plaque proteins in unusual arrays[J]. *Experimental Cell Research*, 1983, 146(2):309-328.
- [116] Li Q H, Tang M T, Wang X D. Establishment of immortalized cow mammary epithelial cells expressing both hTERT and SV40T[J]. *Animal Husbandry & Feed Science*, 2015, 7(2):97-100.
- [117] 卢金霞, 何芳, 刘丛玲,等. 奶牛乳腺上皮细胞模型的建立与鉴定[J]. *黑龙江畜牧兽医*, 2017(9):30-33.

## 第二章 奶牛链球菌型乳腺炎乳腺组织基因表达分析

随人类基因组和其它生物基因组的测序完成,对基因的研究重点从结构转向功能。自上世纪末出现的基因芯片技术得到广泛的应用。基因芯片将物种基因核酸分子固定在载体上,通过与样品核酸分子的杂交,可同时检测大量基因的表达。基因芯片技术的应用为研究不同基因在特定情况下的表达提供了极大的便利<sup>[1-3]</sup>。

奶牛乳腺炎主要是由病原菌侵入乳腺并定植,继而引发乳腺感染,不同病原菌引发的免疫应答存在差异<sup>[4]</sup>。本研究将在建立人工诱导的奶牛链球菌型乳腺炎模型上,利用 Affymetrix 牛基因组芯片技术获得链球菌型乳腺炎乳腺组织的基因表达谱,结合生物信息分析技术寻找差异表达的基因,并对其进行 KEGG 分析,筛选与免疫相关的基因及其通路,为后续研究提供研究基础。

### 1 材料与方法

#### 1.1 试验动物

选择 3 头体况正常、乳房发育良好的中国荷斯坦奶牛,无乳腺炎病史及治疗用药。处于第一胎次泌乳中期,各乳区奶样体细胞数 SCC<10 万/mL,无细菌感染。试验在扬州郊区某奶牛养殖场进行,试验奶牛按常规饲养和管理,隔离观察 7 天后进行试验。

#### 1.2 菌种复苏

无乳链球菌(*S. agalactiae*; 简称链球菌, ATCC13813)由扬州大学兽医学院药理与毒理实验室惠赠。

链球菌接种于 100 mL Todd-Hewitt(改良罗氏培养基)肉汤中,置 37℃生化培养箱复苏 6 小时。用无菌哺乳动物林格氏溶液将肉汤培养物稀释为  $1 \times 10^6$  CFU/mL 链球菌悬液。奶样的链球菌检测参照《中华人民共和国国家标准 食品卫生微生物学检验 溶血性链球菌检验 (GB/T 4789.11-2003)》标准进行。

#### 1.3 主要试剂与仪器设备

主要试剂: miRVana<sup>TM</sup> RNA Isolation Kit (Applied Biosystem p/n AM1556)、Lowinput Quick-Amp Labeling Kit, one-color(24×)(5190-2305), Gene Expression Wash Pack(5188-5327), Gene Expression Hybridization Kit (5188-4242), RNA Spike In Kit, one-color(5188-5282), Package 20 backings, 8 HD arrays per slide(G2534-60015), Package 20 backings, 4 HD arrays per slide (G2534-60012), QIAGEN RNeasy® Mini Kit Qiagen(74106), Chip Agilent

仪器设备：牛奶体细胞快速检测仪扫描仪(SCC-100, )、(Agilent, G2505C)、杂交炉 (Agilent, G2545A)、Agilent Bioanalyzer 2100、NanoDrop(Thermo, 2000)、PCR 仪(ABI, 9700)、离心机(Eppendorf, 5418)、浓缩仪(Eppendorf, 5301)、离心机(其林贝尔, LX-200/300)、振荡器(其林贝尔, GL-88B)磁力搅拌器(其林贝尔, GL-3250B)金属浴(博日, HB-100/CHB-100)

1.4 奶牛链球菌型乳腺炎模型的建立

每头奶牛选取两个乳区，一个为对照乳区，一个为试验乳区。各乳区在下午 5 时挤奶后消毒，利用通乳针将 5mL  $1\times 10^6$  CFU/mL 链球菌悬液经乳头管一次性注入奶牛乳腺内，对照乳区注入相同体积的灭菌 PBS 溶液(Phosphate-buffered saline, 磷酸盐缓冲溶液)，试验乳区分组见表 2-1。

表 2-1 奶牛乳腺接种链球菌悬液及 PBS 溶液分区表  
Table 2-1 Injection udders of *S. agalactiae* and PBS

| 分组<br>Group                 | 注射乳区<br>Injection quarters |         |         |
|-----------------------------|----------------------------|---------|---------|
| 对照组(Control)                | 奶牛 1 左前                    | 奶牛 2 左前 | 奶牛 3 左前 |
| 链球组( <i>S. agalactiae</i> ) | 奶牛 1 右后                    | 奶牛 2 左后 | 奶牛 3 右后 |

1.5 组织样品的采集

链球菌导入乳腺后 24 小时后，检测各乳区牛奶体细胞数和细菌数，结合临床症状观察，确定奶牛乳腺炎模型构建成功后，无菌操作采集奶牛的乳腺组织( $\geq 1$  g)，分取一部分立刻放入液氮罐中带回实验室，随即转入-70℃冰箱备用，剩余乳腺组织用福尔马林溶液固定后按常规石蜡组织切片方法制备切片。

1.6 样品芯片分析前处理

1.6.1 总 RNA 的提取

按照 miRVana™ RNA Isolation Kit (Applied Biosystem p/n AM1556 )试剂盒的方法，操作提取乳腺组织样的总 RNA，具体步骤如下：

- (1)取 0.1g 乳腺组织与 1mL lysis/binding buffer 匀浆混匀，加入 0.1mL Homogenate additive 涡旋混匀，置冰上 10min;
- (2)混合液加 1mL acid-phenol: chloroform, 涡旋 60s, 10,000g 离心 5min，取上清。
- (3)上清液中按体积比 1: 1.25 加入无水乙醇，涡旋混匀，反复过纯化柱，终体积小于 700μL, 10,000g 离心 15s。
- (4)纯化柱加入 350μL wash 1, 离心 5-10s, 清洗纯化柱, 10,000g 离心 15s, 弃去滤液。

(5) 加 DNase I 10  $\mu\text{L}$  和 Buffer RDD70  $\mu\text{L}$  入膜上(QIAGEN#79254), 室温放置 15min。

(6)加入 350  $\mu\text{L}$  wash 1, 离心 5-10s, 清洗纯化柱, 10,000g 离心 15s, 弃过滤液。

(7) 依次加入 500  $\mu\text{L}$  wash 2、wash3, 离心 5-10 s, 清洗纯化柱, 10,000g 离心 15s 后弃去滤液, 再继续离心 1min。

(8)在新的收集管中将离心柱放入, 加入 95℃预热的 Elution Solution 100 $\mu\text{L}$  或 nuclease-free 水, 室温 12,000g, 离心 20-30s, 管中液体即为提取的 Total RNA, 置-70℃保存。

### 1.6.2 总 RNA 的纯化

按照 QIAGEN RNeasy® Kit 试剂盒方法纯化总 RNA, 并检测 RNA 质量(Agilent 2100 Bioanalyzer, Agilent Technologies, Palo Alto, CA)。具体操作步骤如下:

(1)取总 RNA $\leq 0.1\text{mg}$  溶于 100  $\mu\text{L}$  RNase free 水中, 加入 350  $\mu\text{L}$  Buffer RLT 并充分混匀。

(2)加入 250  $\mu\text{L}$  无水乙醇, 充分混匀。

(3) 将上述混合溶液转入 RNeasy mini 柱子(置于 2 mL 离心管), 8000g 以上离心 30s, 弃去滤液。

(4)移取 500  $\mu\text{L}$  Buffer RPE 转入 RNeasy mini 柱子内, 8000g 以上离心洗涤 30s, 弃去滤液, 重复洗涤一次。RNeasy mini 柱子转入 1.5ml Eppendorf 新管中。

(5)移取 40  $\mu\text{L}$  RNase free 的水, 8000g 以上离心洗脱 1min, 重复离心洗涤一次, 合并滤液。

### 1.6.3 cDNA 第一链和第二链一步法合成

(1) 移取 0.2 $\mu\text{g}$  总 RNA、5ng polyA 共 2.5 $\mu\text{L}$  于 0.2ml 离心管中, 加入 2 $\mu\text{L}$  Spike Mix , 0.8 $\mu\text{L}$  T7 Promoter Primer, 65℃保温反应 10 min, 冰浴 5 min。

(2) 配置 cDNA 合成体系: 取 2 $\mu\text{L}$  5 $\times$ First Strand Buffer(80℃预热 3-4 min), 1  $\mu\text{L}$  0.1M DTT, 0.5 $\mu\text{L}$  10mM Dntp mix, 1.2 $\mu\text{L}$  AffinityScript Rnase Block Mix 于(1)中冰浴的 RNA 中, 混匀后离心。PCR 反应条件设置为: 40℃ 2h, 70℃ 15min, 冰上静置 5min。

### 1.6.4 荧光标记 cRNA 合成与纯化

(1) 荧光标记 cRNA 合成: 在 1.6.3 cDNA 液中加入 6 $\mu\text{L}$  Transcription mix 混匀, 40℃静置 2h。(Transcription mix 体系: 3.2 $\mu\text{L}$  5 $\times$ Transcription buffer, 0.24 $\mu\text{L}$  T7 RNA Polymerase Blend 0.6 $\mu\text{L}$  0.1M DTT, 1 $\mu\text{L}$  NTP mix, 0.21 $\mu\text{L}$  Cy3-CTP, , 0.75 $\mu\text{L}$  H<sub>2</sub>O)

(2)荧光标记 cRNA 纯化: 用 QIAGEN RNeasy® Mini Kit 进行纯化。

cRNA 合成溶液中加入 84 $\mu$ L RNase free 水与 350 $\mu$ L Buffer RLT 混合均匀, 再加入 250 $\mu$ L 无水乙醇, 混匀, 全部转入 RNeasy 柱子内(置于 2mL 离心管内),  $\geq 8000g$  离心 15-30s, 弃滤液; 吸取 500 $\mu$ L Buffer RPE 到 RNeasy mini 柱子内(置于新的 2mL 离心管内),  $\geq 8000g$  离心洗涤 15-30s, 弃滤液, 重复洗涤离心一次, 更换 RNeasy mini 柱子套管; 加入 30 $\mu$ L RNase free 水, 静置 1min 后,  $\geq 8000g$  离心洗脱 1min, 重复一次。

### 1.6.5 cRNA 样品片段化和芯片杂交、洗涤及扫描

(1)cRNA 样品片段化: 取 1.65 $\mu$ g cRNA, 11 $\mu$ L 10 $\times$ Blocking Agent, 加水至 52.8 $\mu$ L, 加入 2.2 $\mu$ L 25 $\times$ Fragmentation Buffer, 混匀, 60 $^{\circ}$ C 温水浴 30min, 冰浴 1min; 加入 55 $\mu$ L 2 $\times$  GEx Hybridization Buffer 混匀。

(2)芯片杂交: 芯片上样, 65  $^{\circ}$ C 17 h, 以 10rpm 滚动杂交。

(3)洗涤: 杂交结束, 将芯片转入洗液 1 中 1min, 再转入洗液 2 中, 1min(37 $^{\circ}$ C)。

(4)扫描: 采用 Agilent 扫描仪, 自动以 100%和 10%PMT 方式各扫描一次, 分辨率为 5  $\mu$ m, 合并两次扫描结果。

### 1.6.6 表达谱芯片数据分析

实验所采用的芯片为牛基因组芯片 Agilent(4 $\times$ 44K, Design ID:023647)。用 GeneChip Scanner3000 扫描芯片结果, 用 Feature Extraction 软件(version10.7.1.1, Agilent Technologies)读取芯片原始数据, 运用 GeneSpring Software(12.5 Agilent)quantile 方法标准化芯片原始数据。T 检验法筛选差异表达基因, 利用在线数据库 KEGG 对差异表达基因做 pathway 分析。

## 2 结果

### 2.1 奶牛链球菌型乳腺炎模型建立

链球菌导入乳腺 24h 后, 各试验乳区乳腺外观红肿、触痛, 发热, 体温明显上升, 产奶量减少, 奶中有絮状物, SCC 急剧上升, 超过 200 万个/mL(仪器测定最大值); 各对照乳区乳腺外观正常, 奶样无明显变化。细菌学检测结果表明试验组有链球菌的生长, 无其他杂菌生长; 对照组无链球菌和杂菌生长。石蜡组织切片经 HE 染色后, 对照组乳腺组织结构完整, 乳腺上皮细胞排列整齐(图 2-1 A); 而试验组乳腺组织显示明显的病理变化: 乳腺组织结构松散, 乳腺间质发生水肿, 细胞间连接空隙增大, 乳腺上皮细胞萎缩, 腺泡腔变大, 乳腺腔内可见脱落的乳腺上皮细胞、多形核中性粒细胞、巨噬细胞、淋巴细胞等炎性细胞集结团聚(图 2-1 B)。上述试验结果表明成功诱导奶牛乳腺组织链球菌型乳腺炎。

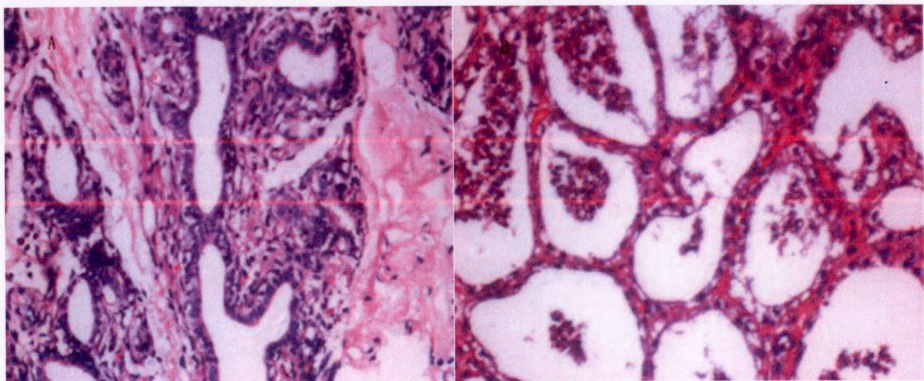

图 2-1 乳腺组织切片(400×)

(A. 对照组乳腺组织：乳腺组织结构完整； B 链球菌组乳腺组织：乳腺组织结构松散，乳腺上皮细胞萎缩，腔内可见团聚物)

Fig. 2-1 HE staining of mammary glands tissue (400×)

(A. control mammary gland tissue: normal mammary, integrated structure; B. infected *S. agalactiae* mammary gland tissue: mammary epithelial cells connect loosely, intercellular gaps increase)

2.2 样品总 RNA 质控

样品总 RNA 纯化后经 Agilent Bioanalyzer 2100 检测，RNA 的浓度在 0.0509μg/μL ~0.4069μg/μL 之间，A260/A280 为 2.06~2.12，RIN≥7.0，浓度、纯度及完整度均相对较高，可用于后续的实验操作<sup>[5]</sup>。

2.3 基因芯片杂交扫描

芯片杂交后扫描得到的荧光强度如图 2-2 所示，图 2-2 D、E、F 为试验组，图 2-2 A、B、C 为对照组。一般地荧光强度图可反映芯片杂交的情况，亮度越高，越清晰，越致密均匀，说明杂交的状况越好。图 2-2 表明各样品间的亮度、均匀性相接近，芯片杂交效果较好。

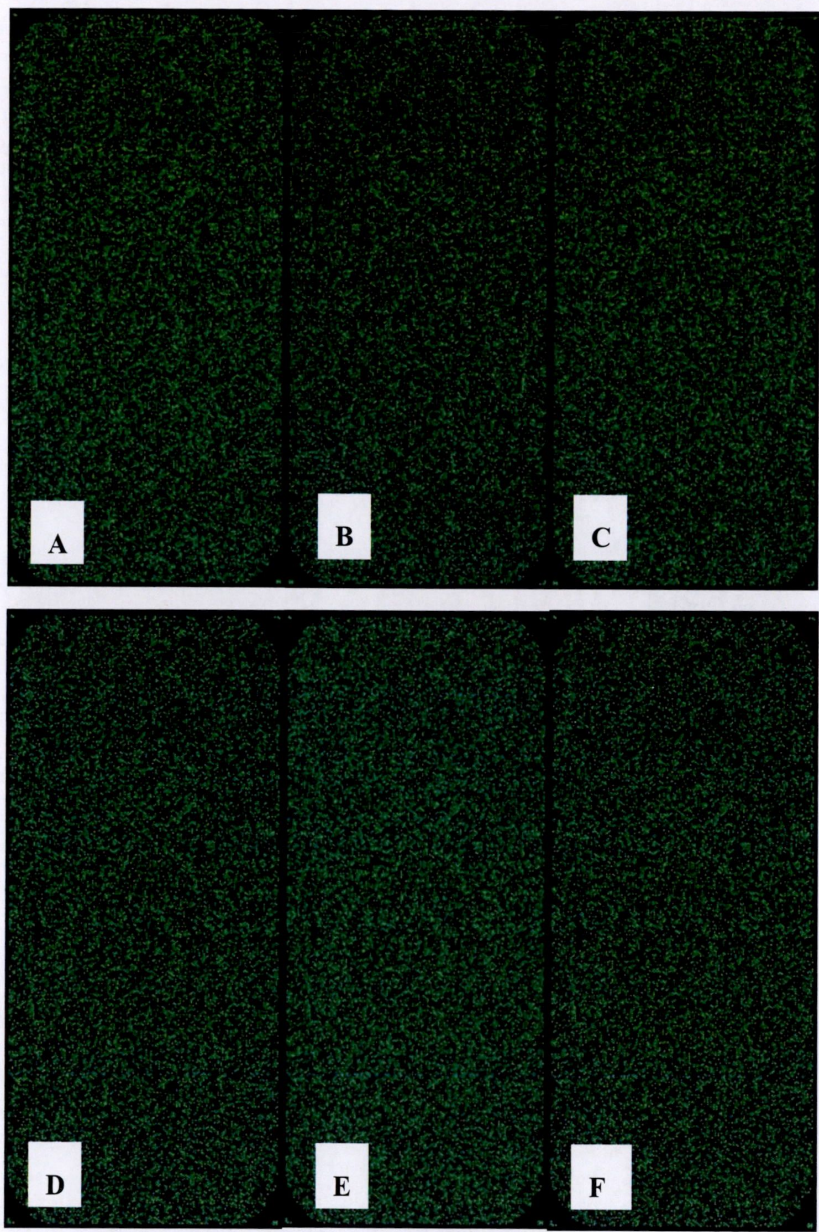

图 2-2 基因芯片表达谱信息  
(对照: ABC; 链球组: DEF)  
Fig. 2-2 microarray expression information  
(Control: ABC; *S.agalactiae* : DEF)

2.4 基因芯片数据处理

基因芯片原始数据经GeneSpring 软件标准化后，转化为log2并绘制散点图(图2-3)，图中每一个点代表了芯片上的探针点。由图2-3可知，标准化数据大部分集中在对角线上，无偏态或分散现象，少部分点分布在对角线两侧绿色线之外，表明大多数探针点在两张芯片中的信号值差异在1倍左右，少部分探针点的信号值差异大于2倍。

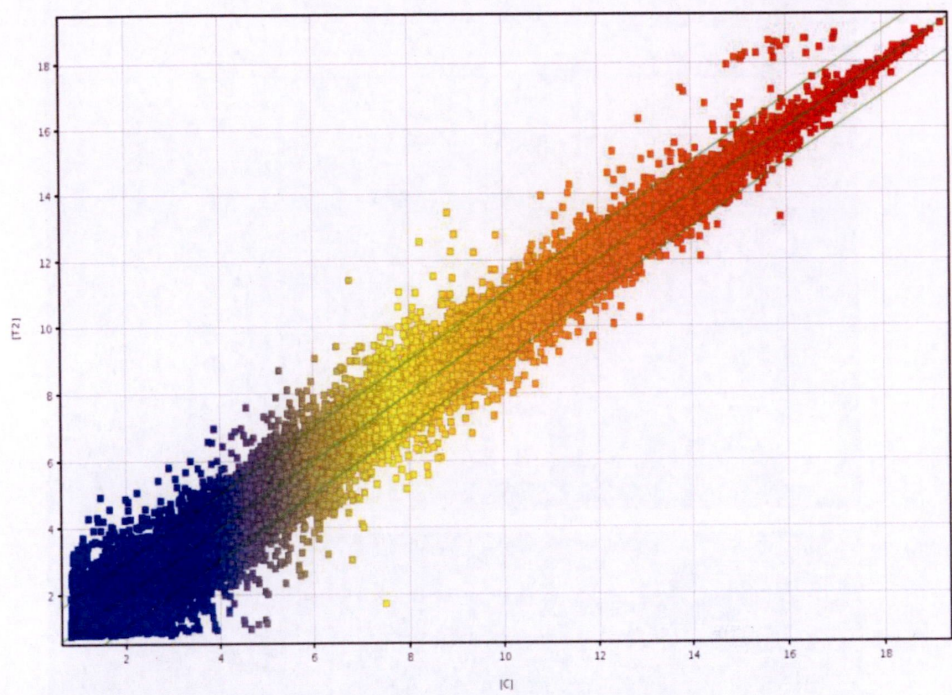

图 2-3 基因芯片数据归一化后散点图  
Fig.2-3 Scatter plot of normalized microarray data

2.5 差异表达基因

利用 T 检验法筛选出链球菌和对照组间差异表达的基因共 136 个( $FC \geq 2$ ,  $P \leq 0.05$ ), 包括 78 个表达上调的基因和 58 个表达下调的基因(表 2-2)。PSORS1C2 基因上调表达最多, 比对照组上调近 11 倍, 一些与免疫相关的基因如 CD34、CD55、VWF、ITGA1、CDH5、CDH13 等上调表达, 而另外一些基因如 EPO、CCL17、C4BPB 等表达下调。

表 2-2 基因芯片差异表达的基因列表  
Table 2-2 Differential expression genes list of microarray

| 探针           | 基因         | 变化倍数 FC | P 值        | 表达调控       |
|--------------|------------|---------|------------|------------|
| ProbeName    | GeneSymbol | (abs)   | P value    | Regulation |
| A_73_P041461 | PSORS1C2   | 10.97   | $p < 0.05$ | up         |
| A_73_113047  | TKDP2      | 7.63    | $p < 0.05$ | up         |
| A_73_P136746 | NGB        | 5.37    | $p < 0.05$ | up         |
| A_73_P429541 | NOTCH2     | 4.25    | $p < 0.05$ | up         |
| A_73_109462  | ZNF527     | 4.09    | $p < 0.05$ | up         |
| A_73_P072481 | CD34       | 3.58    | $p < 0.01$ | up         |

|              |                     |      |          |    |
|--------------|---------------------|------|----------|----|
| A_73_P314496 | <i>LMO3</i>         | 3.47 | $p<0.05$ | up |
| A_73_111061  | <i>PYROXD2</i>      | 3.33 | $p<0.05$ | up |
| A_73_P317596 | <i>ACTN2</i>        | 3.27 | $p<0.05$ | up |
| A_73_P115411 | <i>PROM1</i>        | 3.26 | $p<0.01$ | up |
| A_73_P046151 | <i>UNC93A</i>       | 3.18 | $p<0.05$ | up |
| A_73_P056961 | <i>CD55</i>         | 3.15 | $p<0.05$ | up |
| A_73_P267776 | <i>SDC4</i>         | 3.13 | $p<0.05$ | up |
| A_73_106014  | <i>OR6K3</i>        | 3.06 | $p<0.05$ | up |
| A_73_P405146 | <i>CPM</i>          | 3.02 | $p<0.01$ | up |
| A_73_P033601 | <i>TMPRSS2</i>      | 2.99 | $p<0.05$ | up |
| A_73_P074921 | <i>TRPC6</i>        | 2.94 | $p<0.05$ | up |
| A_73_106379  | <i>IRX6</i>         | 2.89 | $p<0.05$ | up |
| A_73_P079801 | <i>MAPKBP1</i>      | 2.76 | $p<0.05$ | up |
| A_73_P161512 | <i>LOC100849018</i> | 2.66 | $p<0.05$ | up |
| A_73_P109231 | <i>VWF</i>          | 2.66 | $p<0.05$ | up |
| A_73_P114836 | <i>GREB1</i>        | 2.64 | $p<0.05$ | up |
| A_73_P323991 | <i>FAM124B</i>      | 2.59 | $p<0.05$ | up |
| A_73_P048976 | <i>ANGPT2</i>       | 2.49 | $p<0.05$ | up |
| A_73_P100506 | <i>TRPC6</i>        | 2.48 | $p<0.01$ | up |
| A_73_P044636 | <i>ECM1</i>         | 2.45 | $p<0.05$ | up |
| A_73_P048011 | <i>C19H17orf28</i>  | 2.44 | $p<0.05$ | up |
| A_73_117250  | <i>TRPC6</i>        | 2.39 | $p<0.01$ | up |
| A_73_111683  | <i>SERF1A</i>       | 2.38 | $p<0.05$ | up |
| A_73_P096006 | <i>DCBLD2</i>       | 2.35 | $p<0.05$ | up |
| A_73_P076339 | <i>LOC514818</i>    | 2.34 | $p<0.05$ | up |
| A_73_P032956 | <i>PGM5</i>         | 2.32 | $p<0.05$ | up |
| A_73_117606  | <i>GALNTL4</i>      | 2.30 | $p<0.05$ | up |
| A_73_P051101 | <i>APLNR</i>        | 2.28 | $p<0.05$ | up |
| A_73_114513  | <i>DCPIA</i>        | 2.28 | $p<0.05$ | up |
| A_73_P103616 | <i>LOC782599</i>    | 2.24 | $p<0.05$ | up |
| A_73_P069776 | <i>SERF1A</i>       | 2.20 | $p<0.05$ | up |
| A_73_P086251 | <i>PGM5</i>         | 2.20 | $p<0.05$ | up |

|              |                  |      |          |      |
|--------------|------------------|------|----------|------|
| A_73_P080776 | <i>TTC7B</i>     | 2.17 | $p<0.05$ | up   |
| A_73_P148936 | <i>TARM1</i>     | 2.16 | $p<0.05$ | up   |
| A_73_113526  | <i>GK2</i>       | 2.16 | $p<0.05$ | up   |
| A_73_120060  | <i>PROS1</i>     | 2.15 | $p<0.01$ | up   |
| A_73_103882  | <i>ITGAI</i>     | 2.14 | $p<0.05$ | up   |
| A_73_120843  | <i>PGM5</i>      | 2.14 | $p<0.05$ | up   |
| A_73_P398786 | <i>ITGB4</i>     | 2.13 | $p<0.05$ | up   |
| A_73_108372  | <i>LOC532114</i> | 2.13 | $p<0.05$ | up   |
| A_73_P205102 | <i>GFRAL</i>     | 2.12 | $p<0.01$ | up   |
| A_73_P473873 | <i>RFFL</i>      | 2.12 | $p<0.01$ | up   |
| A_73_P251436 | <i>FAM213A</i>   | 2.11 | $p<0.05$ | up   |
| A_73_P369761 | <i>TPP1</i>      | 2.10 | $p<0.05$ | up   |
| A_73_P037406 | <i>CLEC3B</i>    | 2.10 | $p<0.05$ | up   |
| A_73_P403846 | <i>ELMO1</i>     | 2.09 | $p<0.05$ | up   |
| A_73_P425116 | <i>CDH5</i>      | 2.08 | $p<0.05$ | up   |
| A_73_P258696 | <i>GNAO1</i>     | 2.08 | $p<0.05$ | up   |
| A_73_108001  | <i>MCOLN3</i>    | 2.07 | $p<0.05$ | up   |
| A_73_P095276 | <i>LOC614396</i> | 2.06 | $p<0.05$ | up   |
| A_73_117213  | <i>CDHI3</i>     | 2.05 | $p<0.05$ | up   |
| A_73_P469738 | <i>HTR2B</i>     | 2.05 | $p<0.05$ | up   |
| A_73_P109876 | <i>PPMIN</i>     | 2.05 | $p<0.01$ | up   |
| A_73_P300791 | <i>MCOLN3</i>    | 2.04 | $p<0.01$ | up   |
| A_73_100407  | <i>LOC539690</i> | 2.04 | $p<0.05$ | up   |
| A_73_P307376 | <i>RFFL</i>      | 2.03 | $p<0.05$ | up   |
| A_73_P102236 | <i>CACNA1A</i>   | 2.01 | $p<0.01$ | up   |
| A_73_P057731 | <i>ABCA12</i>    | 8.86 | $p<0.05$ | down |
| A_73_101573  | <i>TMPRSS4</i>   | 8.50 | $p<0.05$ | down |
| A_73_P038081 | <i>FXD3</i>      | 5.53 | $p<0.05$ | down |
| A_73_P303326 | <i>FXD3</i>      | 5.52 | $p<0.05$ | down |
| A_73_P455771 | <i>TMPRSS4</i>   | 4.25 | $p<0.05$ | down |
| A_73_P085546 | <i>ADAM19</i>    | 3.88 | $p<0.05$ | down |
| A_73_113942  | <i>FXD3</i>      | 3.73 | $p<0.05$ | down |

|              |                |      |          |      |
|--------------|----------------|------|----------|------|
| A_73_P427526 | <i>HPDL</i>    | 3.28 | $p<0.05$ | down |
| A_73_P384771 | <i>DQX1</i>    | 3.16 | $p<0.01$ | down |
| A_73_114267  | <i>CCL17</i>   | 2.96 | $p<0.01$ | down |
| A_73_P048051 | <i>SBSN</i>    | 2.92 | $p<0.05$ | down |
| A_73_P444261 | <i>KRT15</i>   | 2.87 | $p<0.05$ | down |
| A_73_118568  | <i>C4BPB</i>   | 2.82 | $p<0.05$ | down |
| A_73_P073441 | <i>JAG1</i>    | 2.81 | $p<0.05$ | down |
| A_73_P292021 | <i>WDR4</i>    | 2.78 | $p<0.05$ | down |
| A_73_P511488 | <i>MRPL21</i>  | 2.72 | $p<0.05$ | down |
| A_73_106541  | <i>FST</i>     | 2.70 | $p<0.01$ | down |
| A_73_P171952 | <i>TCAIM</i>   | 2.69 | $p<0.05$ | down |
| A_73_P064441 | <i>LIPG</i>    | 2.68 | $p<0.05$ | down |
| A_73_111371  | <i>EPO</i>     | 2.65 | $p<0.05$ | down |
| A_73_P427756 | <i>ZBTB9</i>   | 2.64 | $p<0.05$ | down |
| A_73_107251  | <i>PTPRU</i>   | 2.64 | $p<0.05$ | down |
| A_73_P363721 | <i>METTL13</i> | 2.54 | $p<0.01$ | down |
| A_73_115808  | <i>ZNF608</i>  | 2.53 | $p<0.05$ | down |
| A_73_107449  | <i>SLC22A5</i> | 2.52 | $p<0.05$ | down |
| A_73_P255781 | <i>SLC22A5</i> | 2.48 | $p<0.05$ | down |
| A_73_P095316 | <i>PTPRU</i>   | 2.45 | $p<0.05$ | down |
| A_73_P046676 | <i>TTC22</i>   | 2.36 | $p<0.05$ | down |
| A_73_108338  | <i>PER3</i>    | 2.35 | $P<0.05$ | down |
| A_73_P064141 | <i>TAF4B</i>   | 2.28 | $P<0.05$ | down |
| A_73_P077216 | <i>CDX2</i>    | 2.28 | $p<0.05$ | down |
| A_73_P112471 | <i>RBM20</i>   | 2.24 | $p<0.05$ | down |
| A_73_P294281 | <i>DDN</i>     | 2.23 | $p<0.05$ | down |
| A_73_P365221 | <i>XRCC3</i>   | 2.22 | $p<0.05$ | down |
| A_73_111663  | <i>MID1IP1</i> | 2.20 | $p<0.05$ | down |
| A_73_P274971 | <i>MYBBP1A</i> | 2.19 | $p<0.05$ | down |
| A_73_P090401 | <i>SENPI</i>   | 2.17 | $p<0.05$ | down |
| A_73_106455  | <i>RYR1</i>    | 2.16 | $p<0.05$ | down |
| A_73_P408171 | <i>URB2</i>    | 2.16 | $p<0.05$ | down |

|              |              |      |          |      |
|--------------|--------------|------|----------|------|
| A_73_121134  | TRIP13       | 2.12 | $p<0.05$ | down |
| A_73_114103  | CYP4F3       | 2.10 | $p<0.05$ | down |
| A_73_P511313 | RPS15        | 2.08 | $p<0.05$ | down |
| A_73_111828  | SLC25A22     | 2.06 | $p<0.05$ | down |
| A_73_P107746 | LOC100174924 | 2.06 | $p<0.05$ | down |
| A_73_118109  | ANKRD35      | 2.05 | $p<0.05$ | down |
| A_73_P247076 | MID1IP1      | 2.04 | $p<0.05$ | down |
| A_73_117735  | PDZD4        | 2.03 | $p<0.05$ | down |
| A_73_P038321 | QTRTD1       | 2.01 | $p<0.05$ | down |

2.6 差异表达基因 KEGG 分析

利用 KEGG 数据库对差异表达基因进行的 pathway 分析表明, 29 个表达差异显著的基因共涉及 38 条 pathway(表 2-3), 其中部分通路 与免疫相关, 如补体及凝血级联反应、造血谱系、趋化因子信号通路、JAK-STAT 信号通路、Notch 信号通路等。

表 2-3 差异表达基因通路  
Table 2-3 Pathways of differential genes

| 通路 ID<br>Pathway ID | 条目<br>Term                                                                   | 基因<br>Genes              |
|---------------------|------------------------------------------------------------------------------|--------------------------|
| bta04610            | Complement and coagulation cascades<br>补体及凝血级联反应                             | VWF, CD55, C4BPB, PROS1  |
| bta04512            | ECM-receptor interaction<br>细胞外基质受体相互作用                                      | VWF, ITGB4, ITGA1, SDC4  |
| bta04640            | Hematopoietic cell lineage<br>造血细胞谱系                                         | CD55, CD34, ITGA1, EPO   |
| bta05412            | Arrhythmogenic right ventricular cardiomyopathy (ARVC)<br>致心律失常性右室心肌病 (ARVC) | ITGB4, ITGA1, ACTN2      |
| bta04510            | Focal adhesion<br>粘着斑                                                        | VWF, ITGB4, ITGA1, ACTN2 |
| bta04514            | Cell adhesion molecules (CAMs)<br>细胞粘附分子(CAMS)                               | CD34, SDC4, CDH5         |
| bta04330            | Notch signaling pathway<br>Notch 信号通路                                        | NOTCH2, JAG1             |
| bta04810            | Regulation of actin cytoskeleton<br>肌动蛋白细胞骨架的调控                              | ITGB4, ITGA1, ACTN2      |

|           |                                            |                      |                                  |
|-----------|--------------------------------------------|----------------------|----------------------------------|
| bta04730  | Long-term depression                       | 长期抑郁症                | <i>GNAO1</i> ,<br><i>CACNA1A</i> |
| bta05410  | Hypertrophic cardiomyopathy<br>(HCM)       | 肥厚型心肌病(HCM)          | <i>ITGB4</i> , <i>ITGA1</i>      |
| bta05414  | Dilated cardiomyopathy                     | 扩张型心肌病               | <i>ITGB4</i> , <i>ITGA1</i>      |
| bta04670  | Leukocyte transendothelial<br>migration    | 白细胞跨内皮细胞迁移           | <i>ACTN2</i> , <i>CDH5</i>       |
| bta04020  | Calcium signaling pathway                  | 钙信号转导通路              | <i>HTR2B</i> ,<br><i>CACNA1A</i> |
| bta04062  | Chemokine signaling pathway                | 趋化因子信号<br>转导通路       | <i>ELMO1</i> , <i>CCL17</i>      |
| bta04080  | Neuroactive ligand-receptor<br>interaction | 神经活性配体 - 受体相互<br>作用  | <i>APLNR</i> , <i>HTR2B</i>      |
| bta05416  | Viral myocarditis                          | 病毒性心肌炎               | <i>CD55</i>                      |
| bta04916  | Melanogenesis                              | 黑色素生成                | <i>GNAO1</i>                     |
| bta03022  | Basal transcription factors                | 基础转录因子               | <i>TAF4B</i>                     |
| bta03018  | RNA degradation                            | RNA 降解               | <i>DCP1A</i>                     |
| bta04930  | Type II diabetes mellitus                  | II 型糖尿病              | <i>CACNA1A</i>                   |
| bta04530  | Tight junction                             | 紧密联接                 | <i>ACTN2</i>                     |
| bta04740: | Olfactory transduction                     | 嗅觉传导                 | <i>LOC514818</i>                 |
| bta04060  | Cytokine-cytokine receptor<br>interaction  | 细胞因子-细胞因子受体的<br>相互作用 | <i>EPO</i>                       |
| bta04350  | TGF-beta signaling pathway                 | TGF-β 信号通路           | <i>FST</i>                       |
| bta04630  | Jak-STAT signaling pathway                 | JAK-STAT 信号<br>转导途径  | <i>EPO</i>                       |
| bta00561  | Glycerolipid metabolism                    | 甘油脂代谢                | <i>LIPG</i>                      |
| bta04320  | Dorso-ventral axis formation               | 背腹轴的形成               | <i>NOTCH2</i>                    |
| bta05016  | Huntington's disease                       | 亨廷顿氏病                | <i>TAF4B</i>                     |
| bta04540  | Gap junction                               | 缝隙连接                 | <i>HTR2B</i>                     |
| bta04010  | MAPK signaling pathway                     | MAPK 信号通路            | <i>CACNA1A</i>                   |
| bta04520  | Adherens junction                          | 粘着连接                 | <i>ACTN2</i>                     |

|          |                              |           |                |
|----------|------------------------------|-----------|----------------|
| bta05322 | Systemic lupus erythematosus | 系统性红斑狼疮   | <i>ACTN2</i>   |
| bta04742 | Taste transduction           | 味觉传导      | <i>CACNA1A</i> |
| bta03010 | Ribosome                     | 核糖体       | <i>RPS15</i>   |
| bta00590 | Arachidonic acid metabolism  | 花生四烯酸代谢   | <i>CYP4F3</i>  |
| bta03440 | Homologous recombination     | 同源重组      | <i>XRCC3</i>   |
| bta02010 | ABC transporters             | ABC 转运体   | <i>ABCA12</i>  |
| bta00512 | O-Glycan biosynthesis        | O-聚糖的生物合成 | <i>GALNTL4</i> |

### 3 讨论

#### 3.1 奶牛链球菌型乳腺炎模型的建立

在当今奶牛养殖业中，奶牛乳腺炎造成严重的经济损失<sup>[6-7]</sup>。奶牛乳腺炎有多种因素可导致其发生，但以病原微生物感染为主要因素，链球菌、金色葡萄球菌和大肠杆菌这三种病原菌占全部感染的 70%~90%<sup>[8-9]</sup>。与其他哺乳类动物相比，奶牛乳腺组织在泌乳期分泌大量的富含营养和抗病物质的乳汁提供给新生动物，因而对病原菌更敏感<sup>[7]</sup>。奶牛乳腺炎的治疗和防控依然目前研究的重点，清楚地了解乳腺炎的发病机制，才能制定相应的对策解决难题。

随现代生物技术的发展，利用实验动物建立乳腺炎疾病模型，研究其发病原因及机体的免疫应答成为一种有效的研究手段。小鼠作为一种良好的试验素材被广泛采用，如伦艳霞等<sup>[10]</sup>、张静等<sup>[11]</sup>分别利用从乳腺炎奶中分离到的无乳链球菌和金黄色葡萄球菌感染小鼠，各自建立 BALB/c 小鼠乳腺炎。利用小鼠建立的乳腺炎病理模型是一种经济且便于管理的研究模式，但不可忽视的是小鼠与奶牛的存在种间差异，且在诱发小鼠乳腺炎的过程中，操作不当容易对小鼠乳腺组织造成人为的损伤，不能完全真实模拟奶牛乳腺炎的自然发病机制<sup>[12]</sup>。而少数直接利用奶牛诱导乳腺炎的研究多集中在金黄色葡萄球菌型乳腺炎，如袁峥嵘等<sup>[13]</sup>、刘利等<sup>[14]</sup>的研究报道。利用链球菌直接诱导奶牛乳腺炎的研究很少，本试验中建立的链球菌型乳腺炎模型，为深入了解链球菌对奶牛乳腺的致病机制和乳腺的免疫应答机理提供研究平台。多数研究表明病原菌在诱导乳腺炎的 24h 左右，乳腺炎的临床症状表现明显，奶中体细胞数急剧升至最高值，这与本试验中所观察到临床症状相符。结合乳腺组织病理检查结果可以明确本试验中构建的链球菌型乳腺炎是有效的，反映了乳腺组织受到病原菌侵袭后做出的免疫应答，为后续的研究奠定了良好的工作基础。

### 3.2 基因芯片差异表达基因与奶牛乳腺炎的相关研究

基因芯片技术是近年来应用较广泛的分子生物学技术,通过样品核酸与固定在固相载体上的核酸探针杂交,经放射自显影或荧光扫描显示,一次性获得大量的生物学信息。进一步对生物学信息进行分析,从差异表达的基因中筛选出感兴趣的基因,进而对其功能展开深入研究。Swanson 等用包含 22,000 个基因探针的牛基因芯片,从感染乳房链球菌乳腺组织中筛选出 2,200 个差异表达超过 1.5 倍的基因,表达上调最高的基因如补体成分 3、*IL-10*、*IL-6* 等与免疫反应、程序死亡和氧化应激相关,表达下调的基因涉及脂质代谢和细胞死亡的<sup>[15]</sup>。Moyes 等对感染乳房链球菌的乳腺组织,采用基因芯片发现 2,102 个差异表达的基因,上调的基因主要参与免疫反应,如 *IL6*, *TNF*, *IL8*, *IL10*, *SELL*, *LYZ* 和 *SAA3* 等,下调的基因与牛奶脂肪的合成相关如 *LPIN1*, *LPL*, *CD36*, 和 *BTN1A1*。乳腺内感染激活 *IL-10* 和 *IL-6* 信号通路,下调 *LXR/RXR* 和 *PPAR $\alpha$ /RXR $\alpha$*  信号通路<sup>[16]</sup>。调控网络分析表明 *INF* 正调控与免疫系统功能相关的基因,而负调控与脂质代谢相关如的基因 *GPAM*, *SCD*, *FABP4*, *CD36*, 和 *LPL* 和抗氧化基因 *SOD1*。袁峥嵘采用牛 Affymetrix 基因芯片从感染金葡萄菌乳腺组织中,筛选到 305 个差异表达的基因,其中有 27 个差异表达基因包括 *IL8*、*TLR4*、*TLR2*、*CXCL10*、*CXCL5*、*CACNA2D1*、*CCL2*、*SOS2* 等的基因涉及 9 条与免疫相关的通路,包括 *TOLL* 样受体信号通路、*MAPK* 信号通路、趋化因子信号通路等,这些差异基因可作为奶牛乳腺炎抗性研究的候选基因加以进一步研究<sup>[13]</sup>。

本试验中共筛选到 136 个差异表达显著的基因,包括 78 个上调表达的基因和 58 个下调表达的基因。在这些差异基因中包括 *CCL17*、*EPO*、*CD34*、*CD35*、*VWF*、*CDH5*、*JAG1*、*CACNA1* 等在内的 29 个基因共涉及 38 条通路,与免疫相关的通路有 13 条,其中部分通路与袁峥嵘的试验结果相同,如造血细胞谱系、*MAPK* 信号通路、细胞因子与细胞因子相互作用、趋化因子信号转导通路。这说明不同病原菌诱导的乳腺免疫应答有相似之处,也有病原菌的特异性引起的免疫应答差异性。而本试验中的富集的 *JAK-STAT* 信号通路引起我们的关注。*JAK-STAT* 通路是一条将胞外信号快速传递到胞内的信号通路。多数研究表明 *JAK-STAT* 通路 with 乳腺的关系密切,对乳汁的合成有重要的作用,而关于 *JAK-STAT* 通路 with 乳腺免疫的关系的研究并不多见,近年有研究者发现在金葡萄菌乳腺炎中 *STAT5* 基因表达下调,提出可将其作为奶牛乳腺炎的抗性候选基因。对 *JAK-STAT* 在乳腺免疫应答中的作用机制我们将深入探讨。

### 4 小结

利用基因芯片技术,获得奶牛链球菌型乳腺炎乳腺组织的全基因表达谱,经生物信息学技术分析,共筛选出 136 个差异表达显著的基因,包括 78 个上调表达的基因和 58 个下

调表达的基因。KEGG 分析确定 29 个差异基因涉及 38 条 pathway, 部分通路 with 免疫过程相关如 JAK-STAT 通路, 可做进一步的深入研究。

### 参考文献:

- [1] Pisoni G, Castiglioni B, Stella A, et al. Microarray analysis of gene expression of milk leukocytes in healthy goats[J]. Veterinary Research Communications, 2008, 32 (s1):219-221.
- [2] Evans A C, Forde N, O'Gorman G M, et al. Use of microarray technology to profile gene expression patterns important for reproduction in cattle.[J]. Reproduction in Domestic Animals, 2008, 43(s2):359-367.
- [3] Raddatz B B, Spitzbarth I, Matheis K A, et al. Microarray-based gene expression analysis for veterinary pathologists: a review[J]. Veterinary Pathology, 2017, 54(5): 734-755
- [4] Thompsoncrispi K, Atalla H, Miglior F, et al. Bovine mastitis: frontiers in immunogenetics[J]. Front Immunol, 2014, 5:493(1-10).
- [5] Schroeder A, Mueller O, Stocker S, et al. The RIN: an RNA integrity number for assigning integrity values to RNA measurements[J]. BMC Molecular Biology, 2006,7.doi: 10.1186/1471-2199-7-3
- [6] Reshi A A, Husain I, Bhat S A, et al. Bovine mastitis as an evolving disease and its impact on the dairy industry [J]. International Journal Current Research and Review, 2015, 7(5):48-55.
- [7] Sordillo L M, Streicher K L. Mammary gland immunity and mastitis susceptibility[J]. Journal of Mammary Gland Biology & Neoplasia, 2002, 7(2):135-146
- [8] Nagal K B, Sharma M, Katoch R C. Etiology of bovine mastitis in and around Palampur in Himachal Pradesh[J]. Indian Journal of Animal Sciences, 2012, 69(3):150-152.
- [9] 刘纯传, 陈初茂, 霍杏桃, 等. 乳炎清治疗奶牛临床型乳房炎疗效观察[J]. 中国兽医科技, 1997(2):38-40
- [10] 伦艳霞, 王娜娜, 王家鑫. BALB/c 小鼠无乳链球菌性乳腺炎模型的建立[J]. 中国奶牛, 2008(1):35-38.
- [11] 张静, 郝赞艮. 小鼠乳腺炎模型的建立及肿瘤坏死因子变化的研究[J]. 黑龙江畜牧兽医, 2014(19):142-143.
- [12] Brouillette E, Grondin G, Lefebvre C, et al. Mouse mastitis model of infection for antimicrobial compound efficacy studies against intracellular and extracellular forms of *Staphylococcus aureus*[J]. Veterinary Microbiology, 2004, 101(4):253-262.
- [13] 袁峥嵘. 金黄色的葡萄球菌诱导奶牛实验性乳腺炎研究[D]. 中国农业大学, 2011
- [14] 刘利, 高雪, 高会江, 等. DNA 甲基化在奶牛金黄色葡萄球菌性乳房炎中的调控[J]. 畜牧兽医学报, 2012, 43(10):1554-1558.

- [15] Swanson K M, Stelwagen K, Dobson J, et al. Transcriptome profiling of *Streptococcus uberis*-induced mastitis reveals fundamental differences between immune gene expression in the mammary gland and in a primary cell culture model.[J]. Journal of Dairy Science, 2009, 92(1):117-129.
- [16] Moyes K M, Drackley J K, Morin D E, et al. Gene network and pathway analysis of bovine mammary tissue challenged with *Streptococcus uberis* reveals induction of cell proliferation and inhibition of PPAR $\gamma$  signaling as potential mechanism for the negative relationships between immune response and lipid metabolism[J]. BMC Genomics, 2009, 10(1):542-570.

### 第三章 奶牛链球菌型乳腺炎乳腺组织 microRNA 表达分析

microRNA(miRNA)是一类进化上高度保守的小分子非编码 RNA,长度约为 22 个单核糖核苷酸,由生物体自身的基因组转录产生,具有转录后调控基因表达的功能。miRNA 在哺乳动物上可调节约 60%的蛋白编码基因,广泛参与机体多种生理过程如细胞的生长、增殖、分化及细胞的凋亡和病理过程如细菌病毒的感染、癌症等<sup>[1-4]</sup>。近年来随着高通量测序、基因芯片技术及生物信息学技术等快速发展<sup>[5]</sup>,许多新的 miRNA 不断被发现<sup>[6-8]</sup>,其可能的生物学功能不断被确认。乳腺作为哺乳动物重要的组织器官,具有重要的生理功能,许多研究者对此展开了相关的研究工作,相继发现新的 miRNA,如 Li 等在奶牛乳腺组织中找到 56 个在泌乳期差异表达的 miRNA,96 条新的 miRNA<sup>[9]</sup>;Gu 等发现 3 个新的 miRNA,经克隆测序后发现 13 个高表达的 miRNA 中有 10 个在乳腺组织中差异表达<sup>[10]</sup>;李文清报道 miR-145 是乳腺组织特有的 miRNA<sup>[11]</sup>。上述研究表明越来越多的 miRNAs 在乳腺组织不断被发现。

乳腺炎主要是由病原体侵入乳腺组织内的而导致的一种持续性的炎症反应,链球菌即主要的病原菌之一,由链球菌引发乳腺炎占慢性乳腺炎的 95%<sup>[12]</sup>。鉴于抗生素治疗乳腺炎带来的药物残留和耐药性问题,有必要寻找新的防控乳腺炎的方法。利用 miRNA 的表达特异性,寻找到链球菌型乳腺炎感染过程中奶牛乳腺产生的适应性变化的 miRNA,可以帮助我们更好地理解乳腺组织的炎症应答机制<sup>[13]</sup>。

本章主要内容是在建立人工诱导的链球菌型乳腺炎的基础上,构建健康乳腺组织和感染链球菌的乳腺组织的两个小 RNA 文库,通过生物信息学分析,筛选出差异表达的 miRNAs,并对差异表达的 miRNAs 预测靶基因做 GO 和 KEGG 分析,试验结果为揭示奶牛乳房炎的调控机制提供实验基础。

#### 1 材料和方法

##### 1.1 试验动物及奶牛链球菌型乳腺炎诱导

见第二章 1.1-1.2、1.4。

##### 1.2 样品采集及总 RNA 的提取与纯化

见第二章 1.5-1.6.2。

##### 1.3 Solexa 测序小 RNA 文库构建

纯化后的每个样品取 5 $\mu$ g 总 RNA 制备小 RNA 文库,送至上海欧易生物公司进行小 RNA 深度测序并建库。具体过程为:

- (1)用凝胶电泳将样品 RNA 中分子量在 18-30 个核苷酸分离出来;
- (2)对这部分序列分别在 3'羟基端和 5'磷酸端连接适配体,在 Truncated T4-RNA 连接酶的作用下延伸;
- (3)利用 Real-time 引物将 RNA 反转录为单链 cDNA;
- (4)再同时用上下游接头特异引物扩增反转录产物;
- (5)将 PCR 产物纯化后采用 illumina Hiseq2500 测序平台单端 50bp 的测序模式进行高通量测序(图 3-1)。

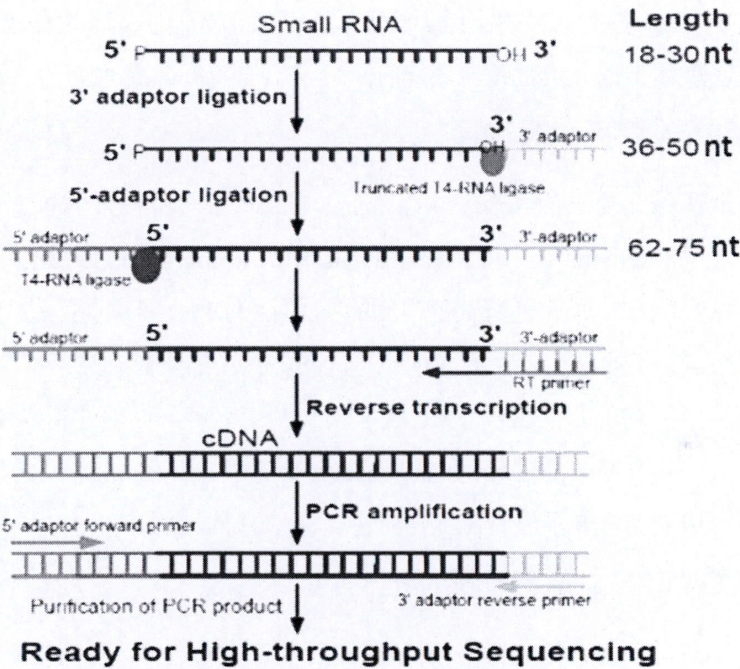

图 3-1 小 RNA 测序流程

Fig. 3-1 Small RNA sequencing experiment process

1.4 测序结果生物信息学分析

对测序获得的原始数据进行去除接头、污染序列及低质量 reads 的处理,并统计 sRNA 的长度分布,分析样品间的公共及特有序列。通过与 Rfam 及 Genbank 数据库的比对,鉴定 rRNA、tRNA、snRNA 等非编码 RNA。通过与 miRNA 数据库(miRBase)中指定范围的 miRNA 进行比对,鉴定样品中的已知 miRNA,与重复序列的比对,鉴定与重复序列相关的 sRNA。再利用 MiReap 对没有注释的 sRNAs 进行预测新的 miRNA。对已知 miRNA 进行差异分析,对差异已知 miRNA 进行靶基因预测及预测靶基因的 GO 富集和 KEGG 通路分析。

### 1.4.1 小 RNA 长度分布

测序的原始结果包含插入片段过长的序列、低质量序列、polyA 序列和小片段序列等，筛除上述片段后的序列称为干净序列(clean reads)，后续的信息学分析均在此基础上进行。小 RNA 的长度区间一般为 18-30nt，通过小 RNA 长度分布的峰值来判断小 RNA 的种类，miRNA 集中在 21 或 22nt，siRNA 集中在 24nt，piRNA 集中在 28-30nt。

### 1.4.2 样品间小 RNA 公共及特有序列分析

统计分析两样品间的公共序列与特有序列的种类及数量(分别用 unique 与 total 表示)，。对不同处理的样品进行小 RNA 公共及特有序列分析帮助判断样品测序的整体性是否一致，若样品间小 RNA 序列在种类上差异较大，而公共部分的序列表达比较集中，则说明不同样品在测序整体上的一致性是比较好的。

### 1.4.3 小 RNA 序列比对注释

经过上述处理的 clean reads 与 Genbank、Rfam 数据库进行比对。选取 Genbank database (<http://www.ncbi.nlm.nih.gov>)与 Rfam database 10.1 (<http://rfam.xfam.org/>)中的 rRNA, scRNA, snoRNA, snRNA, tRNA 来注释测序得到的小 RNA 序列，尽可能的发现并去除其中可能的 rRNA, scRNA, snoRNA。将所有 sRNAs 与各类 RNA 的比对、注释情况进行总结。在以上各注释信息中，有可能存在一个 sRNA 同时比对上两种不同的注释信息的情况。为了使每个 unique sRNA 有唯一的注释，按照 genbank>Rfam> known miRNA 的优先级顺序将 sRNA 比对注释，用 unann 表示没有比上任何注释信息的 sRNAs。

### 1.4.4 已知 miRNA 鉴定与新的 miRNA 预测

miRNA 前体(pre-miRNA)经 Dicer 酶切后发育为成熟体，酶切位点的特异性使得成熟 miRNA 序列存在一定特点，如首位碱基对于碱基 U 具有很强的偏向性；2~4 号位碱基一般缺少 U；此外 miRNA 成熟体序列受酶切位点等因素影响，两端会有不同程度的碱基增减，因此在计算 miRNA 表达时综合考虑这些因素。

miRNA 的鉴定是将测序序列与本物种 miRBase18.0(<http://www.miRbase.org/>)数据库进行比对的结果来分析的，综合分析前体与成熟体两方面的比对情况从而得到该物种 miRNA 的表达结果。比对的原则如下：(1)序列完全比对前体序列；(2)在满足条件(1)的基础上允许序列与成熟体不完全比对，但至少要有 16 个碱基的完全覆盖。同时满足上述条件的序列的表达量之和统计为该 miRNA 的表达量<sup>[14]</sup>。

### 1.4.5 miRNA 差异分析

miRNA 差异分析是针对已知的 miRNA，对两个样品中表达的已知 miRNA 统计分析判断在样品间的表达量是否有显著性差异，并分别用 log2-ratio 和 Scatter plot 图比较两者同一 miRNA 表达量的差异。具体步骤如下：

(1)将样品(control 和 treatment)归一化到同一个量级。

归一化的表达量(Normalized expression, NE)=miRNA 表达量(reads count)/样品总表达量(reads count)\*10<sup>6</sup>

(2)使用标准化后的结果统计 fold\_change 和 P-value 及做图。

变化倍数(Fold\_change)=log2(*S. agalactiae*-NE / Control-NE)

P-value 公式：

$$P(x|y) = \left( \frac{N_2}{N_1} \right)^x \frac{(x+y)}{x! y! \left(1 + \frac{N_2}{N_1}\right)^{(x+y+1)}} \quad C(y \leq y_{\max} | x) = \sum_{y=0}^{y \leq y_{\max}} p(y|x) \quad D(y \geq y_{\max} | x) = \sum_{y \geq y_{\max}}^{\infty} p(y|x)$$

N<sub>1</sub> 和 x 表示对一个给定的 miRNA 在对照组的干净序列数总读数和 归一化的表达量。  
N<sub>2</sub> 和 y 表示一个给定的 miRNA 在链球菌组的干净序列数总读数和归一化的表达量<sup>[15]</sup>。

### 1.4.6 靶基因预测分析

与植物 miRNA 与靶基因完全配对的情况不同，动物 miRNA 与其靶基因是不完全结合配对，因此在利用靶基因预测软件 RNAhybrid 进行预测时，在结果上对于种子序列区域的比对做了限定：miRNA 序列 5'端开始 1-9nt 的碱基处不允许错配，但允许 G-U 配对，同时 G-U 配对的总量不能超过 3 个。

### 1.4.7 GO 富集分析

Gene Ontology(简称 GO)，基因本体，是一个国际化的基因功能分类体系，提供了一套动态更新的标准词汇表(controlled vocabulary)来全面描述生物体中基因和基因产物的属性。GO 总共有三个 ontology，分别描述基因的分子功能(molecular function, MF)、所处的细胞位置(cellular component, CC)、参与的生物过程(biological process, BP)。

GO 功能分析针对靶基因预测结果(以下简称“候选靶基因”)。该分析可以提供与参考基因比较后，在候选靶基因中显著富集的 GO 功能条目，并筛选出候选靶基因与哪些生物学功能显著相关。通过 GO 功能分析可确定候选靶基因行使哪些主要的生物学功能。该分析首先把所有候选靶基因向 Gene Ontology 数据库(<http://www.geneontology.org/>)的各个 term

映射, 并计算映射到每个 term 的含有的靶基因数目, 应用超几何检验, 找出在候选靶基因中显著富集的 GO 条目(与整个参考基因背景相比), 计算公式为:

$$P = 1 - \sum_{i=0}^{m-1} \frac{\binom{M}{i} \binom{N-M}{n-i}}{\binom{N}{n}}$$

公式中, N: 所有基因中具有 GO 注释的基因数量; n: N 中被预测为候选靶基因的数量; M: 所有基因中注释为某特定 GO term 的基因数目; m: 注释为某特定 GO term 的候选靶基因数量。P-value 经 Bonferromi 校正后, 设阈值为 corrected P-value $\leq 0.05$ , 满足阈值条件的 GO term 则为在候选靶基因中显著富集的 GO term。

### 1.4.8 KEGG 通路分析

在生物体内, 不同基因相互协调行使其生物学功能, KEGG(通路的主要公共数据库)提供的 pathway(通路)的分析有助于进一步了解基因的生物学功能。通路的显著性富集分析以 KEGG 中的通路为单位, 应用超几何检验, 找出在候选靶基因中显著性富集的通路(与整个参考基因相比较)<sup>[16]</sup>。计算公式同 GO 分析, 公式中 N 指所有基因中具有通路注释的基因数量; n 指 N 中的候选靶基因的数量; M 指所有基因中注释为某特定通路的基因数量; m 指注释为该特定通路的候选靶基因数目。以 FDR $\leq 0.05$  的通路为显著富集。通路显著性富集分析可明确候选靶基因参与哪些生化代谢途径与信号转导等途径。

## 1.5 部分差异表达 miRNA 荧光定量验证

### 1.5.1 miRNA 反转录为 cDNA

按照 miRcute miRNA First-Strand cDNA Synthesis Kit(Tiangen)试剂盒方法, 将 miRNA 逆转录为 cDNA, 操作步骤如下:

(1)在冰上预冷的 RNase-Free 反应管中加入 2 $\mu$ L 10 $\times$ Polymerase Buffer, 4  $\mu$ L 5 $\times$ r ATP Solution, 0.4 $\mu$ L *E.coli* Poly(A) Polymerase(5U/ $\mu$ L), 2 $\mu$ L 总 RNA(10pg/ $\mu$ L-1 $\mu$ g/ $\mu$ L), RNase-Free ddH<sub>2</sub>O 补充至 20  $\mu$ L。瞬时离心后在 37 $^{\circ}$ C反应 60 min。

(2)取(1)反应液 2 $\mu$ L, 加入 10 $\times$ RT Primer 和 10 $\times$ RT Buffer 各 2 $\mu$ L, Super Pure dNTPs 1 $\mu$ L, RNasin(40U/ $\mu$ L) 1 $\mu$ L, Quant RTase 0.5 $\mu$ L, RNase-Free ddH<sub>2</sub>O 11.5 $\mu$ L, 混匀, 短暂离心后在 37 $^{\circ}$ C反应 60min, 合成 cDNA。

1.5.2 荧光定量反应

试剂盒为 miRcute miRNA qPCR Detection kit(SYBR Green, Tiangen), 采用 SYBR green 法来检测成熟 miRNA 的表达量。miRNA 引物包括上游特异性引物(表 3-1, 上海生工生物技术有限公司合成)和下游通用引物(试剂盒中自带)。以 bta-18s 作为内参, ABI 7500 Real-Time PCR 仪进行 PCR 反应。反应体系(20μL): 10 μL 2×miRcute miRNA Premix, 0.4μL 上游引物, 0.4μL 下游引物, 1.6 μL 50×ROX Reference Dye, 2 μL cDNA, 补 dH<sub>2</sub>O 至 20 μL。反应条件设置: 第一步 94℃ 2min, 第二步 94℃ 20s, 60℃ 34s, 40 个循环。试验设 3 个重复, 采用  $2^{-\Delta\Delta C_t}$  法计算 miRNA 相对表达量<sup>[17-19]</sup>。

表 3-1 qRT-PCR 引物序列  
Table 3-1 Primer sequences for qRT-PCR

| miRNA 名称<br>miRNA name | 引物序列 (5'-----3')<br>Primer sequences (5'-----3') |
|------------------------|--------------------------------------------------|
| bta-miR-136            | CACTCCCTTTGTTTGTATGATGG                          |
| bta-miR-3431           | CCTCAGTCAGCCTTGTGGATGT                           |
| bta-miR-3660           | CCGACTGACAGGAGAGCATTTTA                          |
| bta-miR-378b           | CCATTCGGAACCTCCACTTG                             |
| bta-miR-16a            | CGTAGCAGCTCGTAAATATTGGTGA                        |
| bta-miR-223            | CCTGTCAGTTTGTCAAATACCCCA                         |
| bta-miR-451            | CGCAAACCGTTACCATTACTGAGT                         |
| bta-miR-383            | CAGATCAGAAGGTGATTGTGGCTA                         |
| bta-18s (F)            | CACCGAGGATGAGGTGGA                               |
| bta-18s (R)            | TATTGGCGTGGATTCTGC                               |

2 结果

2.1 数据处理及长度分布

健康组测序获得的 total reads 为 21.29M, 其中 21.25M 为测序质量较高的, 将这部分序列经过去接头和污染后得到 20.85M 的干净序列(clean reads), 占高质量序列的 98.09%(表 3-2)。大部分的序列长度集中在 20nt-23nt, 其中长度分布峰值在 21nt, 占 49.32%(图 3-2A)。链球菌组测序获得 total reads 为 19.14M, 其中 19.09M 为测序质量较高的, 经处理后干净序列数量为 18.54M(clean reads), 占高质量序列的 97.08%(表 3-2)。其中长度分布峰值在 21nt, 占 35.69%(图 3-2B)。

表 3-2 小 RNAs 测序数据质量  
Table 3-2 Summary of small RNAs sequencing data in two groups

| 分类<br>Class                    | 对照组<br>Control (%) | 链球组<br><i>S.agalactiae</i> (%) |
|--------------------------------|--------------------|--------------------------------|
| 总读数(Total-reads)               | 21,293,853         | 19,142,094                     |
| 高质量(high_quality) <sup>1</sup> | 21,253,265 (100)   | 19,093,551(100)                |
| 3'接头缺失(3'adapter_null)         | 5,959 (0.028)      | 5,804 (0.03)                   |
| 插入片段缺失 (insertnull)            | 8,499 (0.04)       | 61,710 (0.32)                  |
| 5'接头污染(5'adapter_contaminant)  | 330,968(1.56)      | 266,943 (1.40)                 |
| 低于 18nt (smaller_than_18nt)    | 60,374(0.28)       | 222,813 (1.17)                 |
| 多聚A (polyA)                    | 465 (0.002)        | 368 (0.002)                    |
| 干净序列(clean_reads) <sup>2</sup> | 20,847,000(98.09)  | 18,535,913(97.08)              |

注：1.高质量：测序序列 1-30 个碱基不含 N，质量值低于 10 的位点不超过 4 个，且质量值低于 13 的位点不超过 6 个的片段；2.干净序列：高质量读数去除接头、污染后得到的序列数。  
Note: 1.high\_quality: Number of high quality reads with no N, no more than 4 bases whose quality score is lower than 10 and no more than 6 bases whose quality score is lower than 13; 3'adapter\_null: Number of reads with no 3' adapto; ; 2. clean\_reads: Number of clean reads after adaptors and contaminant are removed which are used in the following analysis.

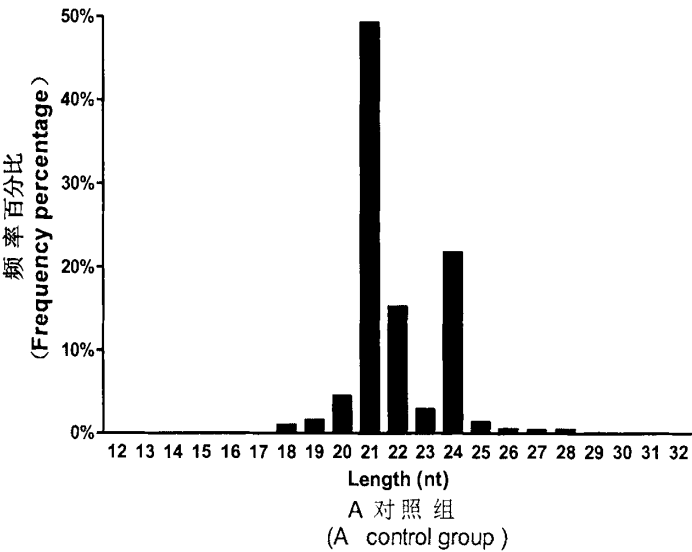

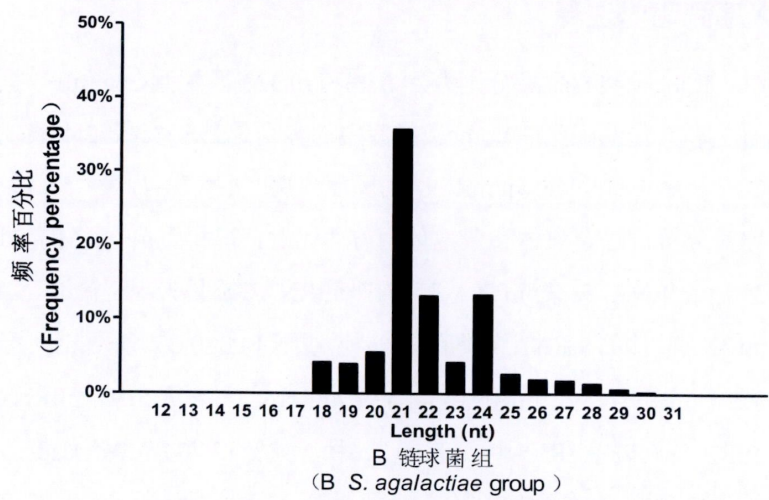

图 3-2 小 RNAs 在样品间的长度分布  
Fig. 3-2 Small RNAs length distribution of two groups

2.2 样品间小 RNA 公共及特有序列分析

由图3-3可知：两组小RNA种类数为1,098,917，小RNA总数和为13,115,640。两组共有的小RNA种类数为130,336，占总数的11.86%；共有的小RNA总数为12,156,904，占总数的90.62%。健康组特有的小RNA种类数为282,007，占总数的25.66%；特有的小RNA总数351,023，占总数的2.62%。链球菌组特有的小RNA种类数为686,574，占总数的62.48%。特有的小RNA总数907,713，占总数的6.77%。数据表明两组样品的测序的一致性较好。

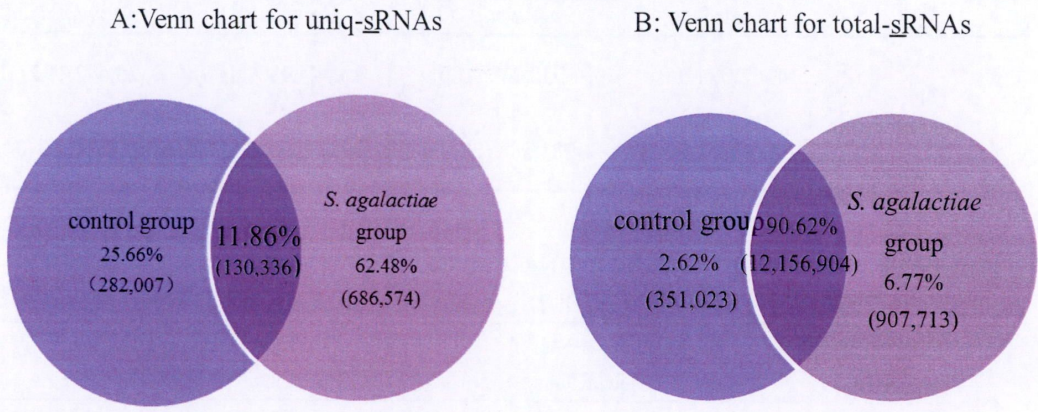

图 3-3 样品公共和特有小 RNAs  
Fig. 3-3 Common and specific sequences between two groups

2.3 小 RNA 序列比对注释

链球菌组小RNA种类和数量分别有29.67%和70.32%匹配到Genome数据库中，而对照组中小RNA种类和数量匹配到Genome数据库中的分别是25.95%和72.48%(表3-3)。小RNA的注释按照Genbank>Rfam>known miRNA的顺序依次匹配(表3-4, 表3-5)。通过与牛miRbase数据库进行比对分析，综合前体和成熟体两方面比对情况得到miRNA的表达情况(表3-6)，健康组中有358个miRNA、53个miRNA-5p、51个miRNA-3p、以及488个miRNA前体被发现，并且匹配上miRNA前体的小RNA种类有8,066种，共计14,380,650条reads匹配上miRNA前体。链球菌组有373个miRNA、59个miRNA-5p、59个miRNA-3p、以及517个miRNA前体被发现，并且匹配上miRNA前体的小RNA种类有10,376种，共计17,703,700条reads匹配上miRNA前体。

在健康组小RNA总量上(Total sRNAs)miRNA占主要部分(70.31%)，但在小RNA种类上(Unique sRNAs)miRNA所占比例较小(1.71%)，绝大部分是未注释的小RNA(89.39%)。链球菌组小RNA总量上(Total sRNAs)miRNA占66.59%。小RNA种类上(Unique sRNAs)miRNA所占比例为1.07%，未注释的小RNA占90.62%(表3-7)。

表 3-3 小 RNAs 匹配 Genome 的统计

Tabel 3-3 Summary of small RNAs sequencing data matched to Genome

| 分类<br>Class | sRNAs 种类<br>Unique sRNAs |                         | sRNAs 数量<br>Total sRNAs |                         |
|-------------|--------------------------|-------------------------|-------------------------|-------------------------|
|             | 对照组(%)                   | 链球菌组(%)                 | 对照组(%)                  | 链球菌组(%)                 |
|             | Control (%)              | <i>S.agalactiae</i> (%) | Control (%)             | <i>S.agalactiae</i> (%) |
| 总数<br>Total | 466,207 (100)            | 950,043 (100)           | 20,444,199 (100)        | 26,572,196 (100)        |
| 匹配<br>match | 120,988 (25.95)          | 281,568 (29.67)         | 14,817,130 (72.48)      | 18,685,726 (70.32)      |

表 3-4 小 RNAs 匹配 Genbank 的统计

Tabel 3- 4 Summary of small RNAs sequencing data matched to Genbank

| 分类<br>Class | sRNAs 种类<br>Unique sRNAs |                         | sRNAs 数量<br>Total sRNAs |                         |
|-------------|--------------------------|-------------------------|-------------------------|-------------------------|
|             | 对照组(%)                   | 链球菌组(%)                 | 对照组(%)                  | 链球菌组(%)                 |
|             | Control (%)              | <i>S.agalactiae</i> (%) | Control (%)             | <i>S.agalactiae</i> (%) |
| Total       | 466,207 (100)            | 950,043 (100)           | 20,444,199 (100)        | 26,572,196 (100)        |
| rRNA        | 23,171 (4.97)            | 49,142(5.17)            | 89,246 (0.44)           | 217,647 (0.82)          |
| tRNA        | 2,937 (0.63)             | 3,998(0.42)             | 14,212(0.07)            | 19,948(0.08)            |
| Other RNA   | 440,099 (94.40)          | 896,903 (94.41)         | 20,340,741 (99.49)      | 26,334,601 (99.10)      |

表 3-5 小 RNA 匹配 Rfam 的统计  
Tabel 3-5 Summary of small RNA sequencing data matched to Rfam

| 分类<br>Class | sRNAs 种类<br>Unique sRNAs |                          | sRNAs 数量<br>Total sRNAs |                          |
|-------------|--------------------------|--------------------------|-------------------------|--------------------------|
|             | 对照组(%)                   | 链球组(%)                   | 对照组(%)                  | 链球组(%)                   |
|             | Control (%)              | <i>S. agalactiae</i> (%) | Control (%)             | <i>S. agalactiae</i> (%) |
| Total       | 466,207 (100)            | 950,043 (100)            | 20,444,199 (100)        | 26,572,196 (100)         |
| rRNA        | 12,369(2.65)             | 25,193(2.65)             | 27,043 (0.13)           | 55,762(0.21)             |
| snRNA       | 1,314 (0.28)             | 2,982 (0.31)             | 2,550 (0.01)            | 8,132 (0.03)             |
| snoRNA      | 2,787 (0.60)             | 4,552 (0.48)             | 19,809 (0.1)            | 30,975 (0.12)            |
| tRNA        | 9,845 (2.11)             | 14,516 (1.53)            | 57,844 (0.29)           | 79,168 (0.30)            |
| Other RNA   | 439,892(94.36)           | 902,800(95.03)           | 20,336,953(99.48)       | 26,398,159(99.34)        |

表 3-6 对照组与链球菌组已知 miRNA 的鉴定统计  
Table 3-6 Summary of known miRNA in *S. agalactiae* and control groups

| 分类<br>Class               | miRN | miR | miRNA | miRN | miRN   | 匹配上 miRNA<br>前体的 unique | 匹配上 miRNA 前<br>体的 total |
|---------------------------|------|-----|-------|------|--------|-------------------------|-------------------------|
|                           | A    | NA* | -5p   | A-3p | A 前体   | sRNAs Unique            | sRNAs total             |
|                           | miRN | miR | miRNA | miRN | Pre-mi | sRNAs matched           | sRNAs matched           |
|                           | A    | NA* | -5p   | A-3p | RNA    | to miRNA<br>precursors  | to miRNA<br>precursors  |
| Known miRNA in<br>miRbase | 620  | 0   | 82    | 81   | 798    | -                       | -                       |
| Control                   | 358  | 0   | 53    | 51   | 488    | 8,066                   | 14,380,650              |
| <i>S. agalactiae</i>      | 373  | 0   | 59    | 59   | 517    | 10,376                  | 17,703,700              |

表 3-7 小 RNA 的分类注释

Table 3-7 Distribution of small RNAs among different categories in control group and *S. agalactiae* group

| 分类<br>Class | sRNAs 种类       |                             | 百分比(%)         |                             | sRNAs 数量       |                             | 百分比(%)         |                             |
|-------------|----------------|-----------------------------|----------------|-----------------------------|----------------|-----------------------------|----------------|-----------------------------|
|             | Unique sRNAs   |                             | Percent(%)     |                             | Total sRNAs    |                             | Percent(%)     |                             |
|             | 对照组<br>control | 链球组<br><i>S. agalactiae</i> |
| Total       | 466,207        | 950,043                     | 100            | 100                         | 20,444,199     | 26,572,196                  | 100            | 100                         |
| miRNA       | 7,957          | 10,190                      | 1.71           | 1.07                        | 14,373,694     | 17,695,043                  | 70.31          | 66.59                       |
| rRNA        | 27,108         | 56,087                      | 5.81           | 5.9                         | 99,431         | 237,918                     | 0.49           | 0.9                         |
| snRNA       | 1,253          | 2,885                       | 0.27           | 0.3                         | 2,475          | 8,011                       | 0.01           | 0.03                        |
| snoRNA      | 2,772          | 4,534                       | 0.59           | 0.48                        | 19,791         | 30,944                      | 0.1            | 0.12                        |
| tRNA        | 10,378         | 15,372                      | 2.23           | 1.62                        | 59,953         | 82,050                      | 0.29           | 0.31                        |
| unann       | 416,739        | 860,975                     | 89.39          | 90.62                       | 5,888,855      | 8,518,230                   | 28.8           | 32.06                       |

2.4 候选 miRNA 的预测

利用 miRNA 预测软件 MiReap(<http://sourceforge.net/projects/miReap/>)对未注释到任何数据库的但可以比对到基因组的序列、比对到内含子区域的序列以及比对到外显子反义链的数据进行分析，得到候选的 miRNA。本次实验中在健康组预测了 232 种候选 miRNA，总表达量 10,063，而链球菌组预测了 399 种候选 miRNA，总表达量 14,127(表 3-8)。

表 3-8 新 miRNA 前体表达预测统计

Table 3-8 Novel miRNA prediction

| 组别<br>Group                  | 预测 miRNA 种类<br>Novel miRNA unique | 预测 miRNA 数量<br>Novel miRNA total |
|------------------------------|-----------------------------------|----------------------------------|
| 对照组<br>Control               | 232                               | 10,063                           |
| 链球菌组<br><i>S. agalactiae</i> | 399                               | 14,127                           |

2.5 miRNA 的差异分析

图 3-4 直观显示的健康组与链球菌组差异 miRNA 散点分布，红色为表达上调差异显著的 miRNA，绿色为表达下调差异显著的 miRNA，中间蓝色的是表达无显著差异的 miRNA。两组表达有显著差异的 miRNA 数量并不多，绝大多数是无显著差异的 miNRAs。由表 3-9 可见链球菌组和健康组之间共有 35 条 miRNA 差异表达显著，其中包括 miR-223、miR-16a 在内的 10 条 miRNA 表达上调，而包括 miR-145、miR-26 等 15 条 miRNA 表达下调(P<0.01，log2>1)。

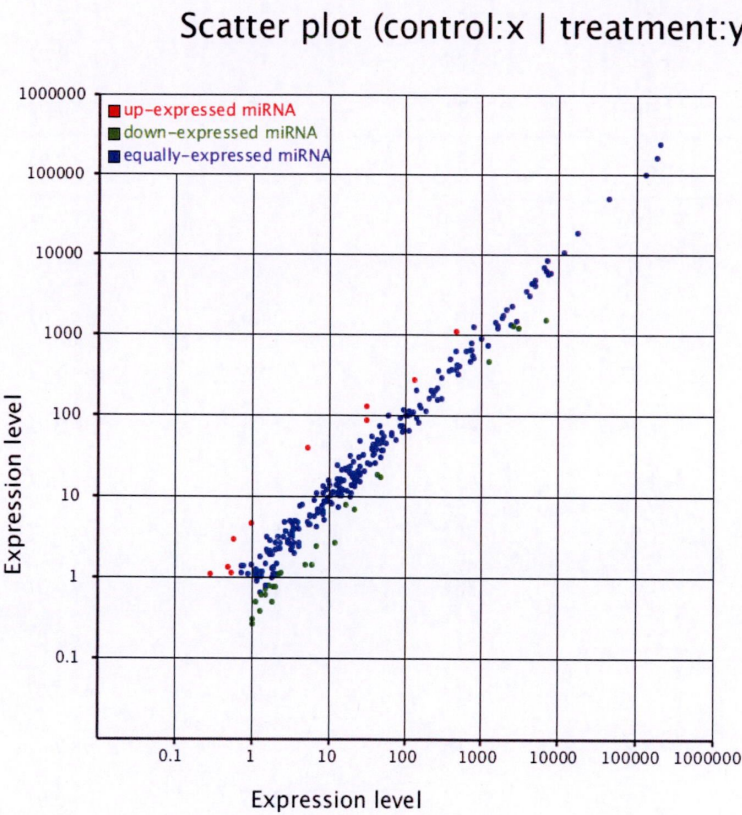

图 3-4 差异表达的已知 miRNA 散点图  
(红色点代表 miRNA 表达量  $\text{ratio}(\text{S.agalactiae}/\text{control}) > 2$ , 蓝色点代表 miRNA 表达量  $1/2 < \text{ratio} \leq 2$  绿色点代表 miRNA 表达量  $\text{ratio} \leq 1/2$ )

Fig. 3-4 Different expressions of known miRNAs between control group and *Streptococcus* group (red points represent miRNAs with FC(fold change) $>2$ , blue points represent miRNAs with  $1/2 < \text{FC} \leq 2$ , and green points represent miRNAs with  $\text{FC} \leq 1/2$ )

表 3-9 两组间差异表达显著 miRNAs  
Table 3-9 Differentially expression known miRNAs in the control and *S.agalactiae* groups

| miR 名称<br>miR-name | 对照组(std)<br>Control-std | 链球组(std)<br><i>S. agalactiae</i><br>-std <sup>a</sup> | 变化倍数(log2 链球组<br>/对照组)<br>Fold-change (log2 <i>S.</i><br><i>agalactiae</i> /Control) <sup>b</sup> | P 值<br>P value | 表达水平<br>Expression<br>level |
|--------------------|-------------------------|-------------------------------------------------------|---------------------------------------------------------------------------------------------------|----------------|-----------------------------|
| miR-223            | 5.23                    | 38.69                                                 | 2.89                                                                                              | $p < 0.01$     | up                          |
| miR-2284k          | 0.59                    | 2.90                                                  | 2.30                                                                                              | $p < 0.01$     | up                          |
| miR-2484           | 0.98                    | 4.55                                                  | 2.22                                                                                              | $p < 0.01$     | up                          |
| miR-451            | 31.26                   | 128.33                                                | 2.04                                                                                              | $p < 0.01$     | up                          |
| miR-383            | 0.29                    | 1.09                                                  | 1.89                                                                                              | $p < 0.01$     | up                          |
| miR-486            | 31.45                   | 85.84                                                 | 1.45                                                                                              | $p < 0.01$     | up                          |

|             |          |          |       |          |      |
|-------------|----------|----------|-------|----------|------|
| miR-2332    | 0.49     | 1.31     | 1.43  | $p<0.01$ | up   |
| miR-122     | 474.51   | 1081.96  | 1.19  | $p<0.01$ | up   |
| miR-16a     | 130.31   | 276.34   | 1.08  | $p<0.01$ | up   |
| miR-326     | 0.54     | 1.13     | 1.07  | $p<0.05$ | up   |
| miR-26a     | 6,964.27 | 1,497.35 | -2.22 | $p<0.01$ | down |
| miR-33a     | 11.79    | 2.67     | -2.14 | $p<0.01$ | down |
| miR-335     | 5.92     | 1.39     | -2.09 | $p<0.01$ | down |
| miR-3660    | 1.03     | 0.26     | -1.96 | $p<0.01$ | down |
| miR-146a    | 1.86     | 0.49     | -1.93 | $p<0.01$ | down |
| miR-206     | 4.89     | 1.43     | -1.77 | $p<0.01$ | down |
| miR-628     | 1.03     | 0.30     | -1.77 | $p<0.01$ | down |
| miR-450b    | 1.27     | 0.38     | -1.75 | $p<0.01$ | down |
| miR-380-p   | 21.77    | 6.81     | -1.68 | $p<0.01$ | down |
| miR-1388-3p | 6.90     | 2.41     | -1.52 | $p<0.01$ | down |
| miR-30e-5p  | 47.84    | 16.97    | -1.49 | $p<0.01$ | down |
| miR-23b-3p  | 1,265.69 | 456.76   | -1.47 | $p<0.01$ | down |
| miR-378b    | 2.05     | 0.75     | -1.45 | $p<0.01$ | down |
| miR-145     | 3,096.82 | 1,212.88 | -1.35 | $p<0.01$ | down |
| miR-136     | 1.91     | 0.75     | -1.34 | $p<0.01$ | down |
| miR-135a    | 1.52     | 0.60     | -1.33 | $p<0.01$ | down |
| miR-126-5p  | 43.83    | 18.21    | -1.27 | $p<0.01$ | down |
| miR-24      | 1.13     | 0.49     | -1.20 | $p<0.05$ | down |
| miR-4286    | 1.32     | 0.60     | -1.13 | $p<0.05$ | down |
| miR-450a    | 2.40     | 1.13     | -1.09 | $p<0.01$ | down |
| miR-3431    | 1.52     | 0.72     | -1.08 | $p<0.01$ | down |
| miR-2478    | 1.66     | 0.79     | -1.07 | $p<0.01$ | down |
| miR-23a     | 2,628.08 | 1,261.32 | -1.06 | $p<0.01$ | down |
| miR-487b    | 16.40    | 7.87     | -1.06 | $p<0.01$ | down |
| miR-331-5p  | 2.25     | 1.09     | -1.04 | $p<0.01$ | down |

注: a: std: 样品中归一化的 miRNA 表达水平;

b: 变化倍数 ( $\log_2^*/^*$ ):miRNA 在组间表达变化倍数;

Note: a: std: Normalised expression level of the miRNA in a sample;

b: Fold change ( $\log_2^*/^*$ ): Fold change in the miRNA expression in the pair of samples;

2.6 miRNA 荧光定量验证

图 3-5 显示从差异表达显著的 miRNAs 中，选择的 8 个 miRNA 荧光定量表达结果。图中可见 bta-miR-136、-378b、-3431、-3660 表达量减少，而 bta-miR-16a、-451、-383、-223 表达增加，与 Solexa 测序结果相比，它们的表达趋势一致，这表明 Solexa 的测序结果是可靠的。

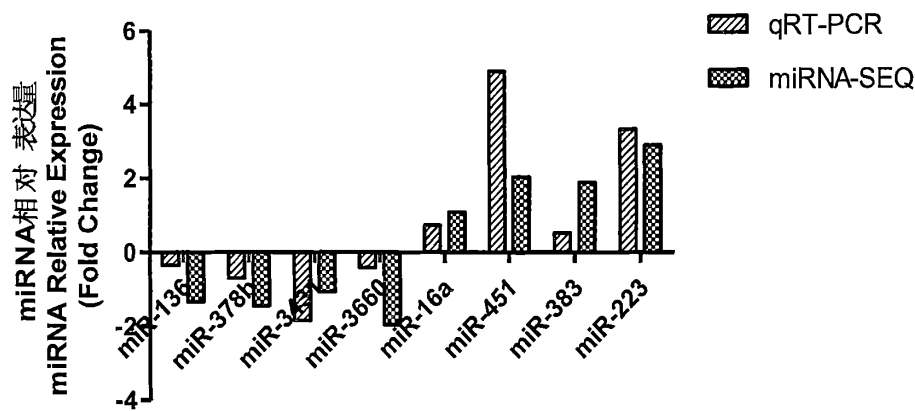

图 3-5 部分 miRNAs 表达荧光定量结果与测序结果比较

Fig 3-5 Compare the results of miRNAs qPCR with solexa sequencing

2.7 对已知差异 miRNA 的靶基因预测及 GO 分析和 KEGG 分析

利用 RNAhybrid 软件对筛选出的差异表达 35 个 miRNAs 进行靶基因预测，共得到 18,801 个靶基因，靶基因位点数 82,832。对预测到的靶基因进行 GO 分析(图 3-6)，发现这些预测靶基因的分子功能涉及生物过程的主要富集在刺激应答、信号、生物调节、细胞死亡、免疫过程上；涉及分子功能的主要富集在结合和转导上。KEGG 分析显示其主要富集于与免疫相关的通路如 RIG-样受体信号通路、细胞质 DNA 感受通路、Notch 信号通路等上(表 3-10)。

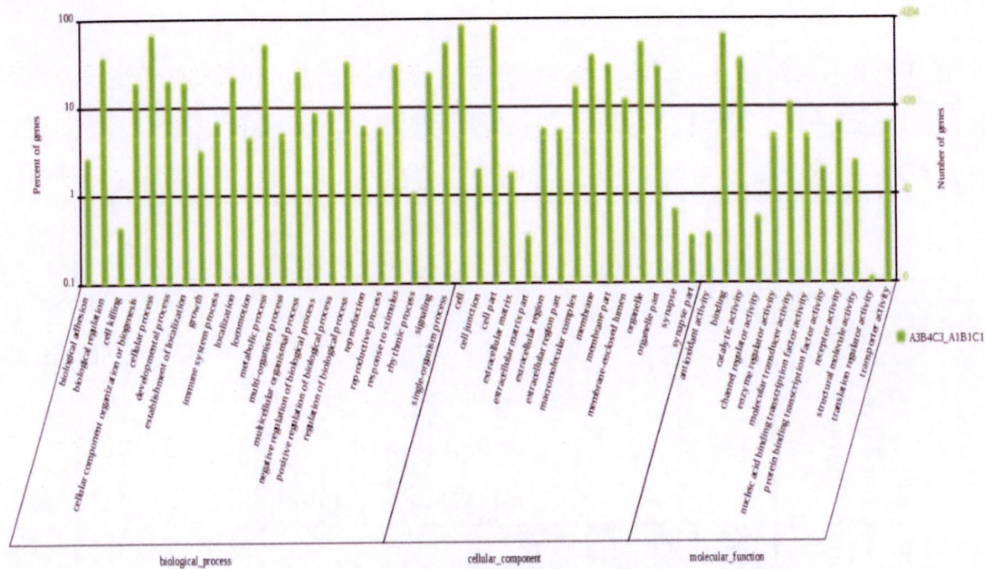

图 3-6 基因富集分析

Fig. 3-6 Gene ontology enrichment analyze

表 3-10 通路注释

Table 3-10 Pathway annotation

| 通路<br>Pathway                              | 注释到通路<br>靶基因<br>Target genes<br>with pathway<br>annotation<br>(15,264) | 所有注释到<br>通路的基因<br>All genes of the species<br>with pathway<br>annotation (16,078) | P 值<br>P-value | Q 值<br>Q-value | 通路 ID<br>Pathway<br>ID |
|--------------------------------------------|------------------------------------------------------------------------|-----------------------------------------------------------------------------------|----------------|----------------|------------------------|
| RIG-I-like receptor<br>signaling pathway   | 106 (0.69%)                                                            | 107 (0.67%)                                                                       | $p<0.05$       | 0.64           | Ko04622                |
| Cytosolic DNA-sensing<br>pathway           | 98 (0.64%)                                                             | 99 (0.62%)                                                                        | $p<0.05$       | 0.70           | Ko04623                |
| Olfactory transduction                     | 1,020 (6.68%)                                                          | 1,051 (6.54%)                                                                     | $p<0.01$       | 0.12           | Ko04740                |
| Hypertrophic<br>cardiomyopathy (HCM)       | 284 (1.86%)                                                            | 289 (1.8%)                                                                        | $p<0.01$       | 0.30           | Ko05410                |
| Salmonella infection                       | 280 (1.83%)                                                            | 286 (1.78%)                                                                       | $p<0.01$       | 0.54           | Ko05132                |
| Notch signaling pathway                    | 75 (0.49%)                                                             | 75 (0.47%)                                                                        | $p<0.05$       | 0.641          | Ko04330                |
| Neuroactive<br>ligand-receptor interaction | 324 (2.12%)                                                            | 333 (2.07%)                                                                       | $p<0.05$       | 0.64           | Ko04080                |
| Endocytosis                                | 368 (2.41%)                                                            | 376 (2.34%)                                                                       | $p<0.01$       | 0.30           | Ko04144                |
| Tight junction                             | 386 (2.53%)                                                            | 397 (2.47%)                                                                       | $p<0.05$       | 0.634          | Ko04530                |
| Adherens junction                          | 161 (1.05%)                                                            | 164 (1.02%)                                                                       | $p<0.05$       | 0.64           | Ko04520                |

### 3 讨论

miRNA在维持细胞的稳定性方面发挥重要的作用,miRNA通过与RNA诱导的沉默复合物的蛋白偶联,结合靶基因mRNA的3'非编码区,阻止所结合的mRNA的翻译或直接降解靶mRNA。miRNA差异表达引起其对靶基因表达的调控,进而引起蛋白表达和功能的变化。任何异常表达的miRNA都与一些疾病的状况相关<sup>[20]</sup>,其中某些miRNA可作为分子生物标志物,用于识别生物学通道,从而有助于疾病的诊断,确定疾病的活跃性以及药物治疗的效果<sup>[21]</sup>。研究了解乳腺组织应对乳腺炎免疫而产生的适应性改变的miRNA,对于阐述miRNA调节乳腺免疫应答的机制并提出适当的控制乳腺炎的策略是非常必要的。

在本研究中,共发现35个差异表达显著的miRNA,包括10个上调表达的miRNA和25个下调表达的miRNA。在这些差异表达显著miRNA中,miR-223的表达上调倍数最高(FC=2.86)。Li等实验性金色葡萄球菌感染乳腺组织的结果表明,miR-223表达上调(FC=4.88)<sup>[22]</sup>。miR-223的预测靶基因分析表明,miR-223对免疫系统、内分泌系统有抑制作用,如miR-223负调控中性粒细胞的增殖和分化,减少延长因子*E2F1*的表达来限制细胞的周期循环<sup>[23-24]</sup>。而研究证实的miR-223的靶基因*GZMB*,*IKKa*,*RC3H1*和*STAT3*与炎症和感染相关<sup>[25]</sup>。本研究中所列出的miR-223的部分靶基因参与链球菌诱导的乳腺炎的免疫通路中,miR-223有可能成为乳腺炎的一个候选生物标志物。与miR-223相似,miR-16也参与炎症反应。相关研究表明miR-16a的一个重要功能是维持和调节细胞内炎症介质的水平<sup>[26]</sup>,如miR-16调节巨噬细胞的极化,炎症因子和NF- $\kappa$ B信号通路<sup>[27]</sup>,在牛乳腺炎中miR-16a上调白细胞介素*IL-6*,*IL-8*和*IL-10*的表达<sup>[28]</sup>。

miR-122在几种癌症中如干细胞癌、非小细胞肺癌和膀胱癌以及骨瘤癌中表达量降低<sup>[29]</sup>,而将miR-122过表达后显著减少了癌细胞的增殖、迁移和入侵,促进细胞凋亡<sup>[30]</sup>。miR-122通过靶向调控靶基因的表达而发挥其抑制细胞增殖作用,如在乳腺癌细胞中,将miR-122过表达,miR-122特异性显著降低靶基因*IGF1R*的表达,*IGF1R*的下调表达抑制细胞生长和循环过程,而将*IGF1F*过表达则解除了miR-122的抑制作用<sup>[31]</sup>。

miR-136在三阴性乳腺癌中表达下调,下调量与世界卫生组织定级的肿瘤级别呈负相关,而其靶基因*RASAL2*过表达,且表达量与病理级别呈正相关。在体外培养的乳腺癌细胞中,将*RASAL2*过表达挽救了miR-136调控的抑制肿瘤的入侵和转移<sup>[32]</sup>。miR-136在人的胶质瘤中调节两个确定的抗细胞凋亡的基因*AEG-1*和*Bcl-2*<sup>[33]</sup>。在本研究中我们发现*CD93*是miR-136的一个预测靶基因,而*CD93*是细胞表面的糖蛋白,主要调节吞噬、炎症和细胞粘附<sup>[34]</sup>。miR-136是否通过靶向*CD93*而在奶牛乳腺炎中发挥调控作用还有待进一步探明。

miR-3660在本研究中表达下调,但其功能并不清楚。我们发现*VWF*是miR-3660的一个预测靶基因。*VWF*是一种非共价结合在血浆中的糖蛋白和凝血因子的化合物。而近年有研

究表明 *VWF* 通过负调节血管生成和细胞凋亡而展示出其抗肿瘤的作用<sup>[35]</sup>。KEGG 通路分析表明 *VWF* 参与补体级联通路、ECM 受体互作通路，这些通路都与免疫系统、信号分子互作和细胞集落相关。

另外一些 miRNA 如 miR-335、-378 等与脂肪代谢和脂肪细胞分化相关<sup>[36-37]</sup>。机体的免疫应答涉及多种物质的代谢和信号通路，因此 miRNA 的调控展现出多面性。

## 4 小结

通过构建比较链球菌型乳腺炎乳腺组织和健康乳腺组织的小 RNA 文库，发现 35 个差异表达显著的 miRNA，其中 10 个 miRNAs 表达显著上调，15 个 miRNAs 表达显著下调。通过生物学信息分析，35 个 miRNAs 共预测到 18,801 个靶基因，并富集到与免疫相关的通路。

## 参考文献：

- [1] Condorelli G, Latronico M V, Dorn G W. microRNAs in heart disease: putative novel therapeutic targets?[J]. European Heart Journal, 2010, 31(6):649-658.
- [2] Dorn G W. MicroRNAs in cardiac disease[J]. Translational Research, 2011, 157(4):226-235.
- [3] Taft R J, Pang K C, Mercer T R, et al. Non-coding RNAs: regulators of disease[J]. The Journal of pathology, 2010, 220(2):126-139.
- [4] Manikandan J, Aarthi J J, Kumar S D, et al. Oncomirs: the potential role of non-coding microRNAs in understanding cancer[J]. Bioinformatics, 2008, 2(8):330-334.
- [5] 滕晓坤, 肖华胜. 基因芯片与高通量 DNA 测序技术前景分析[J]. 中国科学 C 辑: 生命科学, 2008(10):891-899.
- [6] Stark A, Kheradpour P, Parts L, et al. Systematic discovery and characterization of fly microRNAs using 12 Drosophila genomes[J]. Genome research, 2007, 17(12):1865-1879.
- [7] Berezikov E, Thuemmler F, Van Laake L W, et al. Diversity of microRNAs in human and chimpanzee brain.[J]. Nature Genetics, 2006, 38(12):1375-1377.
- [8] Morin R D, O'Connor M D, Griffith M, et al. Application of massively parallel sequencing to microRNA profiling and discovery in human embryonic stem cells[J]. Genome research, 2008, 18(4):610-621.
- [9] Li Z, Liu H Y, Jin X L, et al. Expression profiles of miRNAs from lactating and non-lactating bovine mammary glands and identification of miRNA related to lactation[J]. BMC Genomics, 2012.13:731(1-15).

- [10] Gu Z L, Eleswarapu S, Jiang H L. Identification and characterization of microRNAs from the bovine adipose tissue and mammary gland.[J]. Febs Letters, 2007, 581(5):981-988.
- [11] 李文清. 牛乳腺上皮细胞中 bta-miR-145 功能的初步研究[D]. 中国农业科学院, 2014.
- [12] Schalm O W, Carroll E J. Bovine mastitis [M]. Lea&Febiger, Philadelphia, 1971.
- [13] Rinaldi M, Li R W, Capuco A V. Mastitis associated transcriptomic disruptions in cattle[J]. Veterinary Immunology & Immunopathology, 2010, 138(4):267-279.
- [14] Staregaroslan J, Koscianska E, Kozlowski P, et al. The role of the precursor structure in the biogenesis of microRNA[J]. Cellular & Molecular Life Sciences Cmls, 2011, 68(17):2859-2871.
- [15] Audic S, Claverie J M. The significance of digital gene expression profiles[J]. Genome research, 1997, 7(10):986-995.
- [16] Kanehisa M, Araki M, Goto S, et al. KEGG for linking genomes to life and the environment[J]. Nucleic Acids Research, 2008, 36:480-484
- [17] Livak K J & Schmittgen T D. Analysis of relative gene expression data using real-time quantitative PCR and the 2<sup>-</sup>(Delta Delta C (T)) Method[J]. Methods, 2001, 25:402-408
- [18] Chao W S. Real-Time PCR as a tool to study weed biology[J]. Weed Science, 2008, 56: 290-296
- [19] Chen Y X, Gelfond J A L, McManus L M, et al. Reproducibility of quantitative RT-PCR array in miRNA expression profiling and comparison with microarray analysis[J]. BMC Genomics, 2009, 10:407(1-10)
- [20] Vimalraj S, Selvamurugan N. MicroRNAs: synthesis, gene regulation and osteoblast differentiation[J]. Current Issues in Molecular Biology, 2013, 15:7-18.
- [21] Gao L, Jiang F. MicroRNA (miRNA) profiling[M]. Cancer Gene Profiling. Springer New York, 2016.
- [22] Li R, Zhang C L, Liao X X, et al. Transcriptome MicroRNA Profiling of Bovine Mammary Glands Infected with *Staphylococcus aureus*[J]. International Journal of Molecular Sciences, 2015, 16(3):4997-5013.
- [23] Fazi F, Rosa A, Fatica A, et al. A minicircuitry comprised of microRNA-223 and transcription factors NFI-A and C/EBP $\alpha$  regulates human granulopoiesis[J]. Cell, 2005, 123(5):819-831.
- [24] Jin W W, Ibeagha-Awemu E M, Liang G X, et al. Transcriptome microRNA profiling of bovine mammary epithelial cells challenged with *Escherichia coli* or *Staphylococcus aureus*

- bacteria reveals pathogen directed microRNA expression profiles[J]. BMC Genomics, 2014, 15:181(1-16)
- [25] Haneklaus M, Gerlic M, O'Neill L A, et al. miR-223: infection, inflammation and cancer[J]. Journal of internal medicine, 2013, 274(3):215-226.
- [26] Jing Q, Huang S, Guth S, et al. Involvement of microRNA in AU-rich element-mediated mRNA instability[J]. Cell, 2005, 120(5): 623-634
- [27] Chen L, Liu X, Li Z, et al. Expression differences of miRNAs and genes on NF- $\kappa$ B pathway between the healthy and the mastitis Chinese Holstein cows [J]. Gene, 2014, 545:117-125
- [28] Naeem A, Zhong K, Moisés S J, et al. Bioinformatics analysis of microRNA and putative target genes in bovine mammary tissue infected with *Streptococcus uberis*[J]. Journal of dairy science, 2012, 95(11):6397-6408.
- [29] Bai S, Nasser M W, Wang B, et al. MicroRNA-122 inhibits tumorigenic properties of Hepatocellular Carcinoma Cells and sensitizes these cells to sorafenib[J]. Journal of Biological Chemistry, 2009, 284(46):32015-32027.
- [30] Ma L, Liu J, Shen J, et al. Expression of miR-122 mediated by adenoviral vector induces apoptosis and cell cycle arrest of cancer cells[J]. Cancer Biology & Therapy, 2010, 9(7):554-561.
- [31] Wang B, Wang H, Yang Z. MiR-122 inhibits cell proliferation and tumorigenesis of breast cancer by targeting IGF1R[J]. Plos One, 2012, 7(10):e47053.
- [32] Yan M X, Li X B, Tong D D, et al. miR-136 suppresses tumor invasion and metastasis by targeting RASAL2 in triple-negative breast cancer[J]. Oncology Reports, 2016, 36(1):65-71.
- [33] Yang Y, Wu J H, Guan H Y, et al. MiR-136 promotes apoptosis of glioma cells by targeting AEG-1 and Bcl-2[J]. Febs Letters, 2012, 586(20):3608-3612.
- [34] Yanaba K, Asano Y, Noda S, et al. Augmented production of soluble CD93 in patients with systemic sclerosis and clinical association with severity of skin sclerosis[J]. British Journal of Dermatology, 2012, 167(3):542-547.
- [35] Liu L, Choi H, Bernardo A, et al. Platelet-derived VWF-cleaving metalloprotease ADAMTS-13[J]. Journal of Thrombosis & Haemostasis, 2005, 3(11):2536-2544.
- [36] Nakanishi N, Nakagawa Y, Tokushige N, et al. The up-regulation of microRNA-335 is associated with lipid metabolism in liver and white adipose tissue of genetically obese mice[J]. Biochemical & Biophysical Research Communications, 2009, 385(4):492-496.

[37] Gerin I, Bommer G T, Mccoin C S, et al. Roles for miRNA-378/378\* in adipocyte gene expression and lipogenesis[J]. American Journal of Physiology Endocrinology & Metabolism, 2010, 299(2):E198-206.

## 第四章 Bta-miR-122 靶向 *EPO* 的双荧光素酶验证

miRNA 是一类非编码的短链 RNA, 长约 18-23 个单核苷酸, 通过与靶基因的 3'UTR 的靶位点结合, 直接降解或抑制靶基因的翻译来实现对靶基因的调控<sup>[1-2]</sup>。在植物上成熟的 miRNA 与靶基因 3'UTR 的靶序列高度匹配, 直接降解靶基因 mRNA; 而在动物上 miRNA 通过 6-8 个核苷酸的种子序列与靶基因 3'UTR 的靶序列完全匹配, 以抑制 mRNA 的翻译为主要调控方式。miRNA 在人或哺乳动物上可调控超过 60% 的基因, 涉及机体生长发育、细胞增殖及凋亡、免疫应答等生命过程, 调控范围非常广泛<sup>[3]</sup>。研究 miRNA 的功能一般是通过分子克隆或高通量测序技术, 发现生命代谢过程中发生变化的 miRNA, 继而利用生物信息学技术分析筛选 miRNA 的预测靶基因, 最终通过实验手段验证 miRNA 是否与靶基因 mRNA 3'UTR 存在作用的靶位点, 从而阐明 miRNA 的功能。miRNA 与预测靶基因的靶位点的结合常利用双荧光素酶报告基因系统来检测验证<sup>[4]</sup>。将 miRNA 目标靶基因的 3'UTR 序列连接在报告基因下游, 构建重组载体, 而后将重组载体与 miRNA 共转入细胞中, 通过检测荧光素酶荧光值的变化来判断两者间是否存在作用靶位点。

在前面的转录组学信息分析研究工作中, 我们发现 miR-122 表达上调, 而 *EPO* 表达下调, 利用 TargetScan 在线分析发现, *EPO* 为 bta-miR-122 的预测靶基因, 在 *EPO* 3'UTR 端存在与 miR-122 结合的靶位点。为验证两者是否存在作用靶位点, 我们采用以萤火虫荧光素酶作报告基因, 海肾荧光素酶作校正基因的双荧光素酶系统来进行验证, 以确定 *EPO* 是否为 bta-miR-122 靶基因。

### 1 材料与方法

#### 1.1 主要仪器、试剂和材料

仪器: PCR 仪(Bio-RAD)、离心机 (湖南湘仪)、恒温振荡器(上海精宏)、CO<sub>2</sub> 培养箱(150i, Thermo 赛默飞世尔科技(中国)有限公司, 中国)、酶标仪(Infinite M200 PRO, TECAN, 瑞士)。

试剂: 蛋白胨(tryptone, OXOID, 英国)、酵母提取物(yeast extract, OXOID, 英国)、限制性内切酶(XhoI, NotI, Thermo, 美国)、质粒小提试剂盒(TIANprep Mini Plasmid Kit, 天根, 北京)、Phusion DNA 聚合酶(Thermo, 美国)、琼脂糖(BioWest, 西班牙)、DNA 纯化回收试剂盒(Universal DNA Purification Kit, 天根, 北京)、连接反应液(Thermo, 美国)、普通 DNA 聚合酶(Thermo, 美国)、DH5 $\alpha$ 感受态细胞(天根, 北京)、氨苄青霉素(Ampicillin sigma,

美国)、DMEM(Gibco, 美国)、胰酶(Gibco, 美国)、Lipofectamine<sup>TM</sup> 2000(Invitrogen, 美国)、Dual-Glo® Luciferase Assay System(E2920, Promega, 美国)

材料：293T 细胞系，由扬州大学兽医学院天然免疫信号、感染与免疫研究室提供。

1.2 牛 *EPO* 基因野生型重组载体构建

根据 NCBI 数据库中对牛 *EPO* 基因 3'UTR 序列(XM\_015460412.1)及载体序列进行分析，而后利用 XhoI、NotI 两个限制性内切酶将目的基因片段克隆到 pmiR-RB-REPORT<sup>TM</sup>Vector 中，载体图谱如图 4-1 所示：

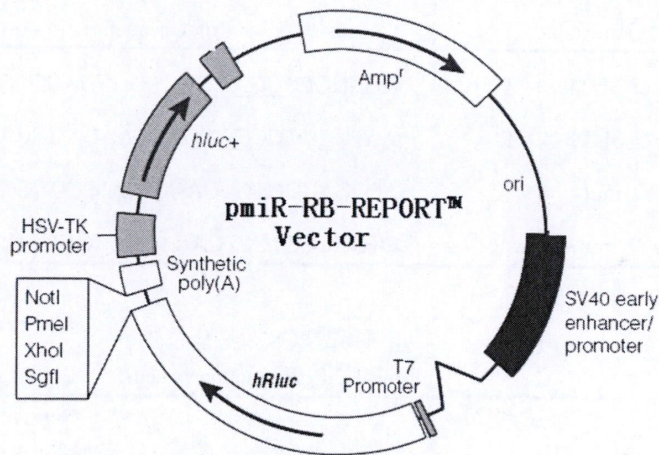

图 4-1 pmiR-RB-REPORT<sup>TM</sup> 载体结构  
Fig. 4-1 pmiR-RB-REPORT<sup>TM</sup> Vector

1.2.1 奶牛乳腺组织 RNA 的提取

取泌乳中期的奶牛乳腺组织，参考第二章 1.6 的方法，进行总 RNA 的提取并反转录为 cDNA。

1.2.2 *EPO* 基因 3'UTR 片段的 PCR 扩增及纯化

根据牛 *EPO* 3'UTR 序列，结合 TargetScan 预测的 bta-miR-122 与牛 *EPO* 基因的结合靶位点(图 4-2)，设计 PCR 扩增引物(表 4-1)，引物由苏州金唯智生物科技有限公司合成。按表 4-2 配制 PCR 反应液，进行 PCR 扩增预测靶位点两端的序列，引物扩增总长度为 584bp。加横线处分别为 XhoI，NotI 酶切位点序列，之前序列为保护碱基。

|                                | predicted consequential pairing of target region<br>(top) and miRNA (bottom) |
|--------------------------------|------------------------------------------------------------------------------|
| Position 127-133 of EPO 3' UTR | 5' ...CAGCCUGUCCACGG--ACACUCCA...                                            |
| bta-miR-122                    | 3' GUUUGUGGUAACAGUGUGAGGU                                                    |

图 4-2 miR-122 与 *EPO* 3'UTR 预测作用靶位点  
Fig. 4-2 miR-122 target predicted location of *EPO* 3'UTR

表 4-1 *EPO* 3'UTR PCR 引物序列  
Table 4-1 *EPO* 3'UTR PCR primes sequences

| 基因名称<br>Gene name | 引物(5'-----3')<br>Prime sequences (5'-----3') |
|-------------------|----------------------------------------------|
| <i>EPO_3UTR</i> F | GGCGGCTCGAGGACAGGTGACCTGGTGCTA               |
| <i>EPO_3UTR</i> R | AATGCGGCCGCAGACCAAGAGCCAGGTTGT               |
| <i>EPO_mut</i> F  | TCCCACGGTGTGAGGAGGGCCAGCGTAACATC             |
| <i>EPO_mut</i> R  | CTGGCCCTCCTCACACCGTGGGACAGGCTGGCA            |

表 4-2 PCR 反应体系  
Table 4-2 PCR reaction system

| 试剂<br>Reagent           | 体积(μL)<br>Volume(μL) |
|-------------------------|----------------------|
| 5×Phusion Buffer        | 6                    |
| 2.5 mM dNTP mix         | 2.4                  |
| 上游引物(10 μM)             | 1                    |
| 下游引物(10 μM)             | 1                    |
| Phusion DNA 聚合酶(2 U/μL) | 0.3                  |
| DNA 模板(约 100 ng)        | 1                    |
| 灭菌水                     | 补足 30                |

反应条件为：98℃ 2min 预变性，循环内 98℃ 10s 变性，从 65℃每个循环降 1℃退火，72℃延伸 20s，10 个循环；再 98℃ 10s 变性，60℃退火，72℃延伸 20s，进行 15 个循环；PCR 反应循环后 72℃继续延伸 3min，然后 4℃保存。

PCR 反应结束，取 5 μL PCR 产物进行 1.5%琼脂糖电泳分析。切胶回收目的 DNA 片段，按照凝胶纯化试剂盒说明书进行纯化产物。

1.2.3 PCR 产物的双酶切及回收纯化与连接

用 XhoI、NotI 酶对上述纯化产物和载体进行双酶切，酶切反应体系如下表：

表 4-3 酶切反应体系  
Table 4-3 PCR reaction system

| 试剂<br>Reagent  | 体积(μL)<br>Volume(μL) |
|----------------|----------------------|
| 10×H 缓冲液       | 4                    |
| DNA            | 约 2 μg               |
| XhoI (10 U/μL) | 1                    |
| NotI(10 U/μL)  | 1                    |
| 灭菌去离子水         | 补足 40                |

反应条件 37℃，4 小时。酶切后回收纯化酶切产物。按照纯化试剂盒说明书进行纯化产物，按表 4-4 连接反应体系配制溶液，16℃连接 30min。

表 4-4 连接反应体系  
Table 4-4 PCR reaction system

| 试剂<br>Reagent    | 体积(μL)<br>Volume(μL) |
|------------------|----------------------|
| 目的片段 DNA         | 2(约 150 ng)          |
| 载体               | 0.5(约 50 ng)         |
| solution I 快速连接液 | 5                    |
| 灭菌去离子水           | 补足 10                |

1.2.4 转化

具体操作步骤如下：

- (1)取连接产物 10 μL 加到 100 μL DH5α 感受态细胞中混匀，冰浴 30min。
- (2)将上述转化液置于 42℃水浴 90s，取出后立即置于冰浴中放置 2-3min。
- (3)向其中加入 900 μL 37℃预热的 LB(不含抗生素)培养基，150 rpm，37℃振荡培养 45min。
- (4)2500 rpm 离心 5min，将上清液吸走，留 100 μL 混匀菌液，加到含 Amp 抗生素 LB 固体琼脂培养基上(抗生素浓度 100μg/mL)，用无菌的弯头玻棒轻轻的将细胞均匀涂开。待平板表面干燥后，倒置平板，37℃培养 12-16 小时。

1.2.5 菌落 PCR 鉴定

挑取 5 个上述平板上的单菌落，溶到 3μL 水中，取 0.5μL 做模板，进行 PCR 反应。按

表 4-5 配制反应体系溶液，反应条件为：95℃ 3min 预变性，循环内 95℃ 30s 变性，56℃ 退火，72℃延伸 1min；20 个循环；PCR 反应循环后 72℃继续延伸 3min，4℃保存。PCR 反应结束，取 5 μL PCR 产物进行 1.5%琼脂糖电泳。

表 4-5 PCR 反应体系  
Table 4-5 PCR reaction system

| 试剂<br>Reagent             | 体积(μL)<br>Volume(μL) |
|---------------------------|----------------------|
| 10×Taq buffer             | 1                    |
| MgCl <sub>2</sub> (25 mM) | 1.6                  |
| dNTP mix                  | 1                    |
| 上游引物(10 μM)               | 0.5                  |
| 下游引物(10 μM)               | 0.5                  |
| Taq DNA 聚合酶(2.5 U/μL)     | 0.3                  |
| DNA 模板                    | 0.5(约 100 ng)        |
| 灭菌水                       | 补足 10                |

1.2.6 PCR 产物测序

将阳性的克隆送测序公司测序进一步鉴定(广州市锐博生物科技有限公司)。

1.3 牛 EPO 基因突变载体构建

利用 PCR 突变的方法，在野生型载体基础上，设计突变引物将靶序列 ACACTCC 突变为 TGTGAGG(表 4-1)。

1.3.1 突变分段 PCR

以野生型载体为模板，分别扩增含突变序列的两段序列。反应体系设计为 30 μL 总体系，配制体系及反应条件同 1.2.2。

1.3.2 突变两段拼接

按表 4-6 配制反应溶液。

表 4-6 反应体系  
Table 4-6 PCR reaction system

| 试剂<br>Reagent           | 体积(μL)<br>Volume(μL) |
|-------------------------|----------------------|
| 纯化产物                    | 1                    |
| 5×Phusion buffer        | 2                    |
| 2.5 mM dNTP mix         | 0.8                  |
| Phusion DNA 聚合酶(2 U/μL) | 0.1                  |
| 灭菌水                     | 补足 10                |

反应条件:98℃ 2min 预变性,循环内 98℃ 10s 变性,从 60℃每个循环降 1℃退火, 72℃延伸 30s, 7 个循环;再 98℃ 10s 变性, 55℃退火, 72℃延伸 30s, 进行 10 个循环; PCR 反应循环后 72℃继续延伸 3min, 然后 4℃保存。

1.3.3 拼接后 PCR、双酶切、回收纯化及连接

PCR 反应体系及后续操作步骤同 1.2.3-1.2.5。

1.3.4 菌落扩大培养提取质粒

挑取上述平板上的单菌落, 接种到含 Amp 抗生素(抗生素浓度 100 μg/mL)的 4mL LB 液体培养基中, 于 220 rpm 摇床培养 12 小时后提取质粒, 并送测序公司测定序列鉴定。

1.4 293T 细胞转染

将构建的 *EPO* 3'UTR 载体质粒与 miR-122mimic 共转染 293T 细胞, 试验分为 4 组, 每组设 3 个重复:

- Bta-miR-122 mimic NC +*EPO* WT(野生型载体)
- Bta-miR-122 mimic +*EPO* WT(野生型载体)
- Bta-miR-122 mimic NC +*EPO* MUT(突变型载体)
- Bta-miR-122 mimic +*EPO* MUT(突变型载体)

具体操作步骤如下:

- (1)293T 细胞常规培养于 37℃, 5%的 CO<sub>2</sub> 的条件下。
- (2)取对数生长期的 293T 细胞, 以 2×10<sup>5</sup> 细胞/孔 细胞密度接种于 96 孔板中, 每孔加 OPTI-MEM 细胞培养液 100μL, 于 37℃培养箱中培养 24h。
- (3)取 9.5μL OPTI-MEM 培养基稀释 0.5μL bta-miR-122 mimics(浓度 10μM)或 mimic NC(10μM), 12.5μL OPTI-MEM 培养基稀释 2.5μL 靶基因 3'UTR 双报告基因载体或突变载体(100ng/μL), 24.75μL OPTI-MEM 培养基稀释 0.25μL Lipofectamine™ 2000 试剂, 5min 后三者混合, 共 50μL, 轻轻摇匀, 静置 20min。

- (4)将上述混合液加入细胞前，每孔去除 50 $\mu$ L 培养基，而后加入混合液，使最终每孔体积仍为 100 $\mu$ L。其中 mimic 及 mimic NC 转染浓度均为 50nM，质粒总量为 250ng/孔，每组设 3 个复孔。37 $^{\circ}$ C 培养 6h 后，再补加 100 $\mu$ L 新鲜培养基。
- (5)检测荧光前，将试剂盒的 Luciferase 底物与 Luciferase buffer 在室温平衡后混匀后分装，-80 $^{\circ}$ C 贮存，使用前室温平衡；stop & GLo buffer 单独分装后-80 $^{\circ}$ C 贮存，使用前室温平衡将两者混合均匀，现配现用。
- (6)转染 48h 后吸出培养基，以 60  $\mu$ L/孔加入 1X PBS，并加入 Luciferase 底物 60 $\mu$ L/孔，振荡 10min，用酶标仪测定萤火虫荧光值。
- (7)加入 60 $\mu$ L Stop reagent 混合液，振荡 10min，测定海肾荧光值。
- (8)计算(6)与(7)的荧光比值。

## 1.5 数据处理和分析

利用生物统计软件 SPSS16.0 进行 T 检验，结果以平均数 $\pm$ 标准误(Mean $\pm$ SE)表示。

## 2 结果与分析

### 2.1 *EPO* 基因 3'UTR PCR 扩增

*EPO* 基因的 3'UTR 片段为 584bp，由图 4-3 可见 *EPO* 基因 3'UTR 扩增后产物的电泳条带与目的条带大小相符合。

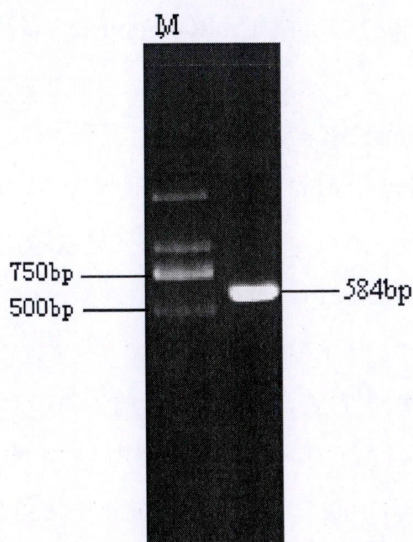

图 4-3 *EPO* 基因 3'UTR PCR 扩增产物电泳条带

(备注：M:Marker, D2000)

Fig. 4-3 PCR production eletrophoretogram of *EPO* 3'UTR

(Note: M:Marker, D2000)

2.2 菌落 PCR 产物电泳结果

挑选的 5 个阳性克隆菌落，用载体上游和载体下游引物 PCR 扩增的条带理论大小为 800bp 左右，由图 4-4 可见 5 个阳性克隆菌落 PCR 产物电泳条带清晰，并与目的条带预期大小相符合。

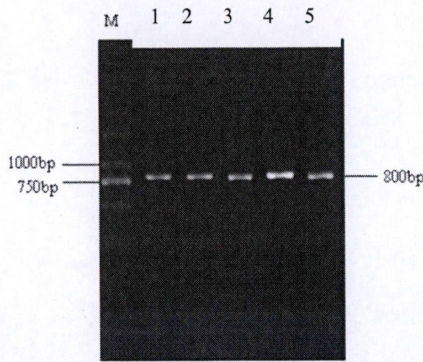

图 4-4 *EPO* 基因 3'UTR 重组载体菌液 PCR 扩增产物电泳条带

(备注： M: Marker, D2000 )

Fig. 4-4 PCR production electrophoretogram of *EPO* 3'UTR recombinant vector bacteria solution

(Note: M: Marker,D2000 )

2.3 阳性克隆测序结果

*EPO* 基因野生型载体阳性克隆由广州锐博生物科技有限公司测序，结果如下(加黑划线标注为插入序列，两边为载体序列)：

CGTTAAGGGAGGCAAGCCCGACGTCGTCCAGATTGTCCGCAACTACAACGCCTACCT  
TCGGGCCAGCGACGATCTGCCTAAGATGTTTCATCGAGTCCGACCCTGGGTCTTTTCC  
AACGCTATTGTCGAGGGAGCTAAGAAGTTCCCTAACACCGAGTTCGTGAAGGTGAAG  
GGCCTCCACTTCAGCCAGGAGGACGCTCCAGATGAAATGGGTAAGTACATCAAGAGC  
TTCGTGGAGCGCGTGCTGAAGAACGAGCAGTAATTCTAGGCGATCGCTCGAGGACAG  
GTGACCTGGTGCTATCACCCCGGGCACGTCCACCATCTCGCTCACCATCACTGCCTGC  
GCCATGCCTTCCACGCCGCGCCACTCCCAACCCCTGTCGACGGGCCACCAGCTCAGTGC  
CAGCCTGTCCACGGACACTCCAGGGCCAGCGGTAACATCTCAGGGGGCTAGAGGAA  
CTGTCCAGAGCTCAACTCAGATCTAAGGATGTCACAGGGCCAGTCTGAGGCCCCAAA  
GCTGGAGGAATTCAGAGTTCAACCTAAACTTGGGGGCAGCACCATGCTGCAGAGAC  
ACTGAGACTCATCTTGGCATGCTGCCAGCCGACGTGCCGGGACCAGCTGGAGGATG  
GATACCTCCTTTTACATGTACCAAACAGGGACAGGATGGACTGGAGAATTTAGGGGG  
AAGACATGAATTCTCCGGGTCTCATGGGGACTCCATGACAGCAGAGTCCACTGGACA

AGGAGGGTGGTGGGAGCCATGAAGATGGAATGGGGGCTGGCCCCTGATTCTCACTGG  
GTCCAAGTCTTGTGTATTTTTCAACCTCACTGGCAAGAACTGAAACCACAACCTGGC  
TCTTGGTCTGCGGCCGCTGGCCGCAATAAAATATCTTTATTTTCATTACATCTGTGTGTT  
GGTTTTTTGTGTGAGGATCTAAATGAGTCTTCGGACCTCGCGGGGGCCGCTTAAGCG  
GTGGTTAGGGTTTGTCTGACGCGGGGGGAGGGGGAAGGAACGAAACACTCTCATTC  
GGAGGCGGC

将插入序列与 Genbank 数据库中牛 *EPO* 基因 3'UTR 比对，结果一致，表明成功构建出 *EPO* 基因 3'UTR 野生型载体。

2.4 野生型载体突变

构建的 *EPO* 基因 3'UTR 突变序列测序结果显示：靶序列 ACACTCC 已突变为 TGTGAGG，成功构建出 *EPO* 基因 3'UTR 突变型载体。

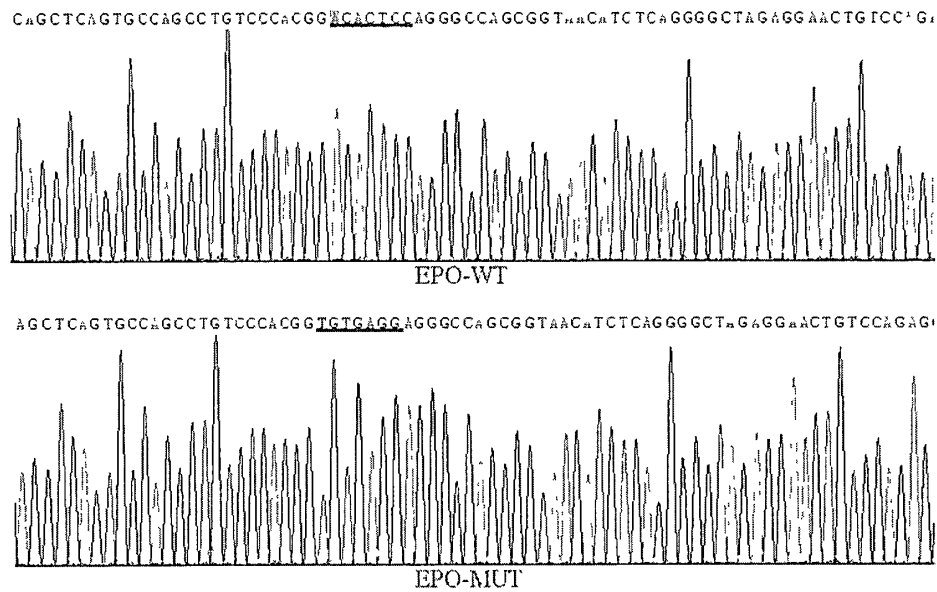

图 4-5 *EPO* 3'UTR 野生型载体与突变型载体序列比对  
Fig. 4-5 Compare sequence of *EPO* 3'UTR WT and MUT

2.5 miR-122 与 *EPO* 3'UTR 靶位点双荧光素酶报告基因的检测结果

bta-miR-122 靶向 *EPO* 的双荧光素酶报告基因检测结果如图 4-6 所示，bta-miR-122 野生型载体质粒和 bta-miR-122 mimic 共转染与其阴性对照相比，显著降低荧光素酶的表达量，其荧光素酶的表达量仅为阴性对照组荧光素酶表达量的 68%( $P<0.01$ )；而 *EPO* 突变型载体质粒和 bta-miR-122 共转染与其阴性对照相比，荧光素酶表达量无显著差异( $P>0.05$ )。这一

结果表明 bta-miR-122 与 *EPO* 的 3'UTR 存在结合靶位点，通过与靶位点的结合调控 *EPO* 基因的表达。

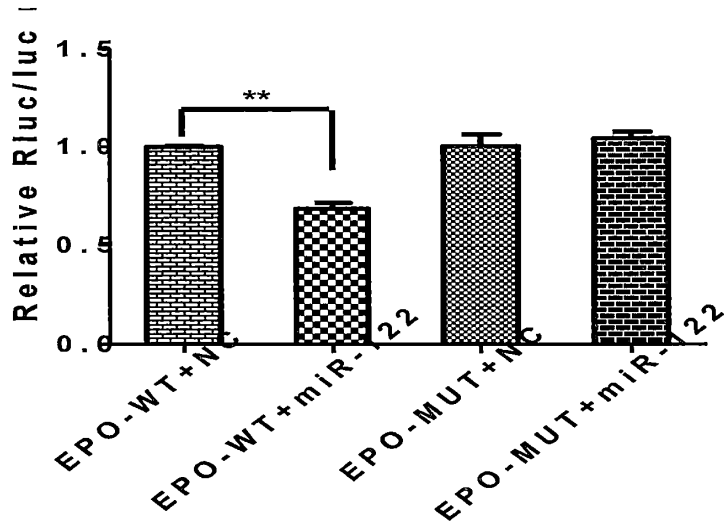

图 4-6 miR-122 靶向 *EPO* 的验证  
Fig. 4-6 Validation of miR-122 targeting *EPO*

### 3 讨论

#### 3.1 miRNA 靶基因的预测与鉴定

miRNA 以碱基互补的方式与靶基因 mRNA 配对直接降解 mRNA 或抑制 mRNA 的翻译，确定两者的关系的重点是找到作用的靶位点。经典的研究认为靶位点一般位于靶基因的 mRNA 3'UTR，但有研究证明靶位点也可以位于靶基因 mRNA 5'UTR 端，甚至可以位于 mRNA 的编码区<sup>[5-7]</sup>。miRNA 的靶基因预测主要通过一些软件如 TargetScan、RNAhybrid 等来寻找筛选<sup>[8-10]</sup>。本研究利用 TargetScan 在线预测 bta-miR-122 靶基因，bta-miR-122 的种子序列 UGUGAGG 与牛 *EPO* 基因 mRNA 3'UTR 127-133bp 间的序列 ACACUCC 匹配，结合 miR-122 上调表达与 *EPO* 下调表达关系，初步确定 *EPO* 为 miR-122 的预测靶基因。

由于在动物上大多数的 miRNA 与靶基因 mRNA 是不完全匹配，要验证 miRNA 的靶基因非常复杂。目前唯一能够验证序列作为 miRNA 直接目标的工具，是基于报告基因携带候选序列的系统<sup>[11]</sup>。双荧光素酶报告基因检测系统方法是鉴定 miRNA 与靶基因作用的靶位点最常用的方法。荧光素酶是理想的报告基因，因为哺乳动物细胞中不含内源性荧光素酶，一旦转录完成无需翻译后的修饰，立刻就生成功能性的荧光素酶<sup>[12]</sup>。萤火虫荧光素酶是大小为 61kDa 的单亚基蛋白，作为报告基因，而海肾荧光素酶是 36kDa 单亚基蛋白，作为内参校正基因。当萤火虫荧光素酶的活性完成测量后，萤火虫荧光在淬灭的同时激活海肾荧

光素酶的发射,通过两者荧光值比值的变化,确定 miRNA 对预测靶基因是否存在作用靶位点。一般地认为野生型载体荧光值下调 30%以上,表明 miRNA 对靶基因有调控作用<sup>[13]</sup>。

### 3.2 miR-122 靶向调控 *EPO* 基因

本研究采用双荧光素酶报告基因检测系统验证了 *EPO* 基因为 miR-122 的靶基因。*EPO* 是促红细胞生成素,除了促红细胞生成的作用外,近年研究发现 *EPO* 同 *INF* 一样为自然免疫的主要参与调节者,具有抗炎、保护神经系统等作用<sup>[14-16]</sup>。*EPO* 是 JAK-STAT 通路的激活因子, JAK-STAT 通路的异常激活常常与疾病相关。在许多肿瘤细胞内 JAK-STAT 通路处于激活状态,癌症细胞借由 JAK-STAT 通路的激活而增殖分化癌细胞,抑制 JAK-STAT 通路则可以减少细胞的增殖<sup>[16-17]</sup>。而在一些炎症反应的疾病中,抑制 JAK-STAT 通路可以减轻炎症反应<sup>[18]</sup>。在奶牛乳腺炎的免疫应答过程是否存在 miR-122 通过靶向 *EPO* 而调控 JAK-STAT 通路还需要通过实验进一步验证。

## 4 小结

通过构建 *EPO* 3'UTR 野生型载体和突变型载体,与 miR-122mimic 共转染 293T 细胞,利用双荧光素酶报告基因系统证实 miR-122 与 *EPO* 3'UTR 存在结合靶位点,miR-122 靶向调控 *EPO* 的表达。

### 参考文献:

- [1] Sevignani C, Calin G A, Siracusa L D, et al. Mammalian microRNAs: a small world for fine-tuning gene expression [J]. Mammalian Genome, 2006, 17(3):189-202.
- [2] Fabian M R, Sundermeier T R, Sonenberg N. Understanding how miRNAs post-transcriptionally regulate gene expression[J]. Progress in Molecular & Subcellular Biology, 2010, 50:1-20.
- [3] Friedman R C, Farh K K, Burge C B, et al. Most mammalian mRNAs are conserved targets of microRNAs[J]. Genome Research, 2009, 19(1):92-105.
- [4] Lee J Y, Kim S, Hwang D W, et al. Development of a dual-luciferase reporter system for in vivo visualization of microRNA biogenesis and posttranscriptional regulation[J]. Journal of Nuclear Medicine, 2008, 49(2):285-294.
- [5] Lytle J R, Yario T A, Steitz J A. Target mRNAs are repressed as efficiently by microRNA-binding sites in the 5' UTR as in the 3' UTR[J]. Proceedings of the National Academy of Sciences of the United States of America, 2007, 104(23):9667-9672.

- [6] Zhou X, Duan X C, Qian J J, et al. Abundant conserved microRNA target sites in the 5'-untranslated region and coding sequence[J]. *Genetica*, 2009, 137(2):159-164.
- [7] Guo Z W, Xie C, Yang J R, et al. MtiBase: a database for decoding microRNA target sites located within CDS and 5'UTR regions from CLIP-Seq and expression profile datasets[J]. *The Journal of Biological Databases & Curation*, 2015, bav102:1-9.
- [8] Lewis B P, Burge C B, Bartel D P. Conserved seed pairing, often flanked by adenosines, indicates that thousands of human genes are microRNA targets.[J]. *Cell*, 2005, 120(1):15-20.
- [9] Friedman R C, Farh K K, Burge C B, et al. Most mammalian mRNAs are conserved targets of microRNAs[J]. *Genome Research*, 2009, 19(1):92-105.
- [10] Krüger J, Rehmsmeier M. RNAhybrid: microRNA target prediction easy, fast and flexible[J]. *Nucleic Acids Research*, 2006, 34:W451-454.
- [11] Nicolas F E. Experimental validation of microRNA targets using a luciferase reporter system[J]. *Methods in Molecular Biology*, 2011, 732:139-152.
- [12] Bhaumik S, Lewis X Z, Gambhir S S. Optical imaging of renilla luciferase, synthetic renilla luciferase, and firefly luciferase reporter gene expression in living mice[J]. *Journal of Biomedical Optics*, 2004, 9(3):578-586.
- [13] 李真. 奶牛乳腺组织中 miRNA 表达谱研究以及与泌乳相关 miRNA 的鉴定[D]. 浙江大学, 2012.
- [14] Sola A, Wen T C, Hamrick S E, et al. Potential for protection and repair following injury to the developing brain: a role for erythropoietin?[J]. *Pediatric Research*, 2005, 57:110R-117R.
- [15] Cerami A. TNF and EPO: major players in the innate immune response: their discovery[J]. *Annals of the Rheumatic Diseases*, 2012, 71 S2(4):i55-i59.
- [16] 王建强, 黄缘. JAK-STAT 信号通路在肝癌发生发展中作用的研究进展[J]. *世界华人消化杂志*, 2013(21):2051-2056.
- [17] Pencik J, Pham H T, Schmoellerl J, et al. JAK-STAT signaling in cancer: From cytokines to non-coding genome[J]. *Cytokine*, 2016, 87:26-36.

## 第五章 奶牛原代乳腺上皮细胞培养方法的建立及细胞转染条件的优化

奶牛乳腺炎是一种乳腺实质组织的炎症反应,包括三个阶段:病原菌入侵、感染和炎症。乳腺上皮细胞抵抗病原菌入侵乳腺,激发奶牛乳腺炎的自然免疫应答,并参与调控病程发展<sup>[1-3]</sup>。奶牛原代乳腺上皮细胞具有二倍体遗传特性,接近体内生长状况,并具有乳腺细胞的生理功能,是研究乳腺炎发病机制及调控的理想模型<sup>[4]</sup>。乳腺上皮细胞体外培养在人和鼠上研究的较多,在其他物种包括牛羊上研究相对较少。目前乳腺上皮细胞的体外培养主要是利用新鲜乳腺组织,也有一些研究采用乳汁<sup>[5]</sup>或是尝试采用冻存乳腺组织<sup>[6]</sup>为培养原材料,多采用胰酶消化法或组织块法进行细胞培养<sup>[7]</sup>。胰酶消化法对胰酶浓度和消化时间要求严格,不易培养成功<sup>[8]</sup>。组织块法对操作要求相对简单,但培养纯化乳腺上皮细胞时间较长,耗时耗力。一些外源性的激素如氢化可的松或细胞因子可以调节细胞的生长和增殖。本章研究内容主要是利用体外培养方式建立原代乳腺上皮细胞模型,摸索细胞转染条件,为后续的 miR-122 是否通过调控 *EPO* 对 JAK-STAT 通路产生影响提供素材和实验基础。

### 1 材料与方法

#### 1.1 主要仪器设备与试剂

仪器设备:倒置显微镜(上海帝伦光学仪器公司, XSP-37XB)、荧光显微镜(德国莱卡)控温 CO<sub>2</sub> 培养箱(Thermo, 150i)、荧光定量 PCR 仪(美国 Life 公司, ABI7500)、超净工作台(苏州净化)、台式离心机(上海卢湘仪器公司, TDZ6B-WS)、水浴锅(Thermo)、高压灭菌锅。

主要试剂:DMEM/F12 培养基(Gibco:C11330500BT)、胎牛血清(FBS: 10437-028)、0.25%Trypsin-EDTA(Gibco: 25200-056)、青霉素-链霉素(碧云天: C0222)、杜氏磷酸盐缓冲液 DPBS(碧云天: C0221D)、两性霉素 B(Sigma: 319A0524)、催乳素(prolactin, PRL, Sigma: L6520)、胰岛素样转铁蛋白硒(insulin like transferrin selenium, ITS, Gibco: 5I500-056)、表皮生长因子(epidermis growth factor, EGF, Sigma: AF-100-15)、氢化可的松(hydrocortisone, Hd, Sigma: H0135)、二甲亚砜(dimethyl sulfoxide, DMSO, Sigma: D2650)、Trizol(Invitrogen: R1100)、cDNA 试剂盒(Takara: RR047A)、qRT-PCR 试剂盒(Takara: RR820A)、FAM-siRNA 上海吉玛)、riboFECT™ CP Transfection Kit(广州锐博: C10511-05)

基础全培养基: DMEM/F12+10%FBS+2x 双抗+2.5μg/mL 两性霉素 B

改进全培养基：基础培养基+0.5  $\mu\text{g/mL}$  Hd+1  $\mu\text{g/mL}$  PRL+10  $\text{ng/mL}$  EGF+1  $\mu\text{g/mL}$  ITS  
冻存液：90%基础全培养基+10% DMSO，4 $^{\circ}\text{C}$  预冷。

## 1.2 奶牛乳腺上皮细胞原代培养

健康无乳腺炎的泌乳期奶牛屠宰后立即剖取新鲜大块乳腺组织( $>10\text{cm}^3$ )，置冰上带回实验室。75%酒精清洗去除乳腺组织表面血液等物质，置磁盘上，剪取中间一小块乳腺组织( $1\text{-}2\text{cm}^3$ )，放入 75%酒精中转入超净台，取出乳腺组织块放入 DPBS(含 5x 双抗)溶液中。用镊子固定组织块，眼科手术剪剪取腺泡颗粒，放入含 DPBS 溶液小烧杯中。去除结缔组织和脂肪组织，清洗腺泡，并将其剪碎至肉糜状。转入离心管中，1000  $\text{r/min}$ ，离心 5min，去除上清。加入 5mL DPBS，混匀后离心并去除上清，如此重复 3-5 次，再将 DPBS 换为 DMEM/F12 培养基，混匀，离心，去除上清。沉淀加入全培养基或改进培养基 1mL 混匀为混悬液，滴加转入 25mL 培养瓶，倒置放入培养箱，4-6h 后待组织块贴壁后轻轻翻转培养瓶以防止组织块漂浮，继续培养，24h 后补加培养基。

## 1.3 乳腺上皮细胞的纯化与传代

乳腺上皮细胞纯化：待乳腺上皮细胞大量长出后，利用乳腺上皮细胞与成纤维细胞对胰蛋白酶消化的敏感性不同将乳腺上皮细胞分离纯化。具体操作：倾去原培养液，加入 PBS 2mL 清洗细胞 1-2 遍，倾去 PBS。再加入 1mL 0.25%Trypsin -EDTA(37 $^{\circ}\text{C}$ 水浴预热)，置培养箱消化 1-2min，显微镜下观察成纤维细胞皱缩、发亮，而乳腺上皮细胞还未或少部分(连片边缘)皱缩、发亮时，迅速加入 5 mL 全培养液终止消化。吸出培养液，在原瓶中加入 5 mL 全培养液，继续培养。如此重复 2-3 次，可得到纯的乳腺上皮细胞。

乳腺上皮细胞传代：操作过程同细胞纯化，将纯化后的乳腺上皮细胞消化后吹打成细胞悬液，经细胞计数后分 2-3 瓶并补加培养液培养。

## 1.4 乳腺上皮细胞形态观察

在原代乳腺上皮细胞培养纯化及传代过程中将细胞培养瓶置于显微镜下观察细胞形态和生长增殖变化。在细胞培养初期重点观察成纤维细胞与乳腺上皮细胞迁出状态，在细胞消化过程中根据细胞形态变化决定消化时间长短，在细胞纯化和传代时根据乳腺上皮细胞的形态判断细胞生长的状态，进而传代分瓶。

## 1.5 乳腺上皮细胞的生长计数

以  $0.25\times 10^4$  个细胞/孔接种 12 孔板，共接种 24 孔。连续 8 天，每天取 3 孔细胞用胰蛋白酶消化制备单细胞悬液。取 100 $\mu\text{L}$  细胞悬液与 100 $\mu\text{L}$  0.4%台盼蓝溶液(1:1)混匀，利用

血细胞计数板(25×16)进行细胞计数，计取四角和中间共 5 方格内细胞个数(细胞压线则计左不计右，计上不计下)，按下述公式计算细胞数，并绘制生长曲线。

计数公式：细胞数  $N=(80 \text{ 小格细胞数}/80) \times 400 \times 2 \times 10^4$

1.6 乳腺上皮细胞的冻存与复苏

细胞冻存：按细胞传代方法制备细胞悬液后转入离心管，以 1500 r/min 转速，离心 3min，去除上清液并加入 1mL 存液，混匀，转入冻存管，标记，棉花包裹，并按 4℃ 40min，-20℃ 60min，-80℃程序逐步降温冻存细胞。

细胞复苏：细胞从-80℃冰箱取出，迅速放入 37℃水浴并晃动冻存管，在 1-2min 内解冻细胞。75%酒精擦拭冻存管，转入超净台，吸出冻存液，转入离心管，以 1500 r/min 转速离心 3min，弃上清，加 5mL 培养基悬浮细胞，随即转入培养瓶培养。

1.7 乳腺上皮细胞 β 酪蛋白基因(CSN2)表达检测

(1)按 Trizol 试剂盒说明书提取乳腺上皮细胞总 RNA，具体步骤如下：

- ① PBS 清洗细胞 2 遍，加 1mL Trizol 室温裂解细胞 10min，转入 1.5mL 离心管；
- ② 加氯仿 0.2mL，剧烈摇振 30s，室温放置 2-3 min；
- ③ 4℃ 12000g 离心 10min，吸取上层水相，转移至另一 EP 管；
- ④ 加 0.5 mL 异丙醇，上下颠倒混匀，室温放置 10 min；
- ⑤ 4℃12000 g 离心 5min，弃上清；
- ⑥ 加 75%乙醇 1mL，摇振，充分洗涤沉淀，4℃12000 g，离心 5min；
- ⑦ 弃上清，沉淀自然干燥，沉淀重悬于 DEPC 水中溶解。

取 1μLRNA 溶解液测定 OD260/280 值和浓度值，另取 4μL 用 1%琼脂糖凝胶电泳检测 RNA 质量。

(2)按 cDNA 试剂盒说明书将总 RNA 反转录为 cDNA，具体步骤如下：

- ①按表 5-1 反应体系配制反应液。

表 5-1 基因组 DNA 的去除反应  
Table 5-1 Genome DNA eraser reaction

| 试剂<br>Reagent                | 体积(μL)<br>Volume(μL) |
|------------------------------|----------------------|
| 5×gDNA Eraser Buffer         | 2                    |
| gDNA Eraser                  | 1                    |
| Total RNA                    | 1000 ng              |
| RNase Free dH <sub>2</sub> O | 补加至 10               |

混合反应液置于 PCR 仪，42℃孵育 5min，4℃保存。

② 按表 5-2 配制反转录溶液。

表 5-2 反转录反应体系  
Table 5-2 Reverse transcription reaction

| 试剂<br>Reagent                          | 体积(μL)<br>Volume(μL) |
|----------------------------------------|----------------------|
| 5×Prime Script Buffer 2(for Real Time) | 4                    |
| PrimeScript RT Enzyme Mix I            | 1                    |
| 混合反应液                                  | 10                   |
| RNase Free dH <sub>2</sub> O           | 补加至 20               |

将上述混合液标记为②，置于 PCR 仪上，37℃ 15min，85℃ 5s，获得 cDNA 第一链，4℃保存或-20℃长期保存。

(3)按 qRT-PCR 试剂盒说明书检测 *CSN2* 基因表达量。

根据 Genbank 上牛 *CSN2* 的序列，设计荧光定量反应引物。牛 *CSN2* 基因和内参 *β-actin* 基因引物序列<sup>[9]</sup>见表 5-3(上海生工合成)。

表 5-3 *CSN2* 与 *β-actin* 基因 qRT-PCR 引物  
Table 5-3 Primer of *CSN2* and *β-actin* for qRT-PCR

| 基因<br>Gene         | 引物序列(5'-----3')<br>Primer sequences(5'-----3') | 产物(bp)<br>Production (bp) |
|--------------------|------------------------------------------------|---------------------------|
| <i>β-actin</i> (F) | ACATCCGCAAGGACCTCTA                            | 116                       |
| <i>β-actin</i> (R) | TCTTCATTGTGCTGGGTGC                            |                           |
| <i>CSN2</i> (F)    | CCTGGTGAGATTGTGGAAAG                           | 106                       |
| <i>CSN2</i> (R)    | CATCCTCTGTTTGCTGCTGT                           |                           |

qRT-PCR 反应采用 20μL 体系，按表 5-4 配制反应溶液。

表 5-4 qRT-PCR 反应体系  
Table 5-4 qRT-PCR reaction system

| 试剂<br>Reagent        | 体积(μL)<br>Volume(μL) |
|----------------------|----------------------|
| SYBR Premix Ex TaqII | 10                   |
| ROX Reference DyeII  | 0.4                  |
| 上游引物(10μmol/L)       | 0.8                  |
| 下游引物(10μmol/L)       | 0.8                  |
| cDNA 模板              | 2                    |
| dH <sub>2</sub> O    | 6                    |

荧光定量产物用 2%琼脂糖凝胶进行电泳。

## 1.8 转染条件的优化

使用荧光标记的 siRNA(FAM-siRNA)检测转染效率。转染前一天按  $1 \times 10^4$ /孔细胞密度铺 96 孔板, 转染前细胞密度为 50%-80%。转染设 5 组: 非转染对照, 50nMsiRNA+1.0 $\mu$ L 转染试剂, 50nMsiRNA+1.5 $\mu$ L 转染试剂 100nMsiRNA+1.0 $\mu$ L 转染试剂, 100nMsiRNA+1.5 $\mu$ L 转染试剂。对每一个转染样品, 按下述步骤操作:

(1)稀释 siRNA: 用 30 $\mu$ L 1 $\times$ riboFECT<sup>TM</sup>CP Buffer 稀释 siRNA, 轻轻混匀。

(2)制备混合液: 加入 3 $\mu$ L riboFECT<sup>TM</sup>CP Reagent, 轻轻吹打混匀, 室温孵育 15min 后加入到细胞培养板中, 轻轻混匀。

(3)将培养板放入培养箱中 37 $^{\circ}$ C, 5%CO<sub>2</sub> 培养。

培养 48h 后荧光显微镜观察转染效果。

## 2 结果

### 2.1 原代乳腺上皮细胞培养

乳腺组织贴壁培养第 3 天, 采用改进培养基培养, 组织块周围可见细长树杈状的成纤维细胞游离出(图 5-1A, 箭头所示), 随后成纤维细胞数量显著增加(图 5-1B、图 5-1C)。第 6~8 天乳腺上皮细胞迁出增多, 呈典型的铺路石状, 形如多边形, 并形成一道与成纤维细胞界限分明的分界线(图 5-1D)。利用成纤维细胞与乳腺上皮细胞对胰蛋白酶敏感性的差异, 消化细胞, 进行乳腺上皮细胞的分离纯化(图 5-1E)。初次纯化后, 集集成岛屿状生长的乳腺上皮细胞周围混杂少量的成纤维细胞生长(图 5-1F)。经过 2~3 次纯化操作, 基本去除成纤维细胞, 视野中可见成片生长的乳腺上皮细胞。而采用基础培养基(对照组)的组织块在第 5 天才有成纤维细胞迁出(图 5-1G, 箭头所示)。随后迁出的乳腺上皮细胞生长缓慢, 在培养至第 10 天进行第一次纯化, 纯化后乳腺上皮细胞数量不多, 且夹杂较多的成纤维细胞(图 5-1H)。对比整个培养过程, 在常规培养基的基础上添加表皮生长因子、氢化可的松、胰岛素转铁蛋白硒、催乳素后, 成纤维细胞从组织块周围迁出的时间较常规培养基方法的时间早两天, 之后迁出的乳腺上皮细胞生长旺盛, 数量多, 缩短了乳腺上皮细胞纯化时间, 为后续试验的开展节省时间。

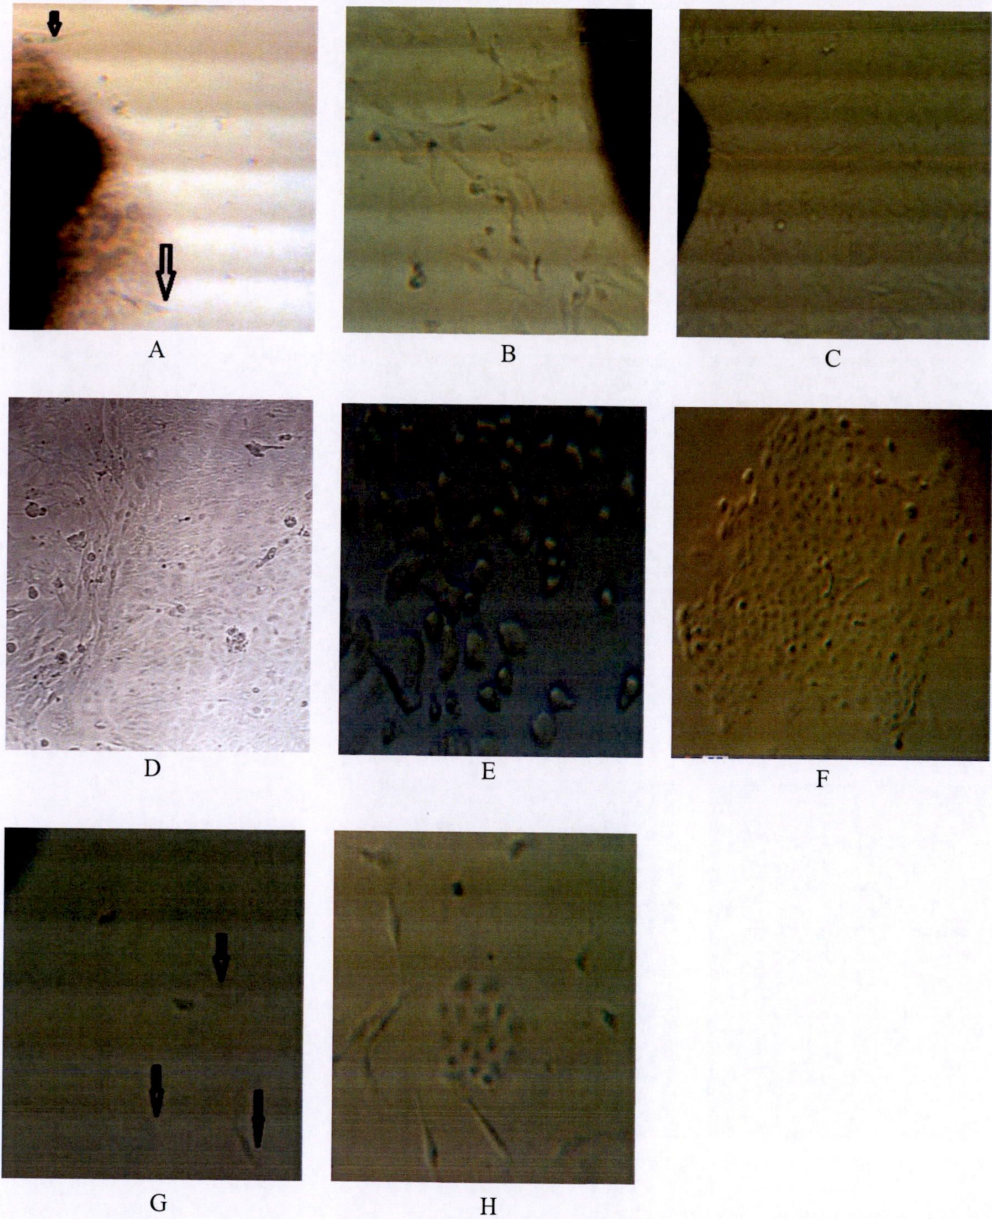

A-C: 成纤维细胞; D: 乳腺上皮细胞与成纤维细胞混合生长; E: 消化后开始皱缩成圆形的乳腺上皮细胞; F: 岛屿状的乳腺上皮细胞与少量的成纤维细胞; G: 第 5 天成纤维细胞(对照); H: 初次纯化的乳腺上皮细胞夹杂成纤维细胞(对照)

A-C: Fibroblasts; D: Mammary epithelial cells and fibroblasts; E: Mammary epithelial cells shrinking into round; F: Mammary epithelial cells island-like and few fibroblasts; G: Fibroblasts at 5<sup>th</sup> day (control); H: Purified mammary epithelial cells with fibroblasts (control)

图 5-1 原代乳腺上皮细胞培养(100×)

Fig.5-1 Primary mammary epithelial cell culture (100×)

2.2 乳腺上皮细胞形态观察

纯化后的乳腺上皮细胞在显微镜下可观察到典型的形态结构。集集成岛屿状生长是乳腺上皮细胞显著的特点(图 5-2A)。在乳腺上皮细胞的生长和传代的过程中还可观察到其他的形状，如鹅卵石状(图 5-2B)和铺路石状(图 5-2C)，细胞内可见细胞核。当乳腺上皮细胞培养时间延长可观察到空泡圆顶状(图 5-2D)。当乳腺上皮细胞经冻存复苏后生长迅速，呈不规则的多边形(图 5-2E)。

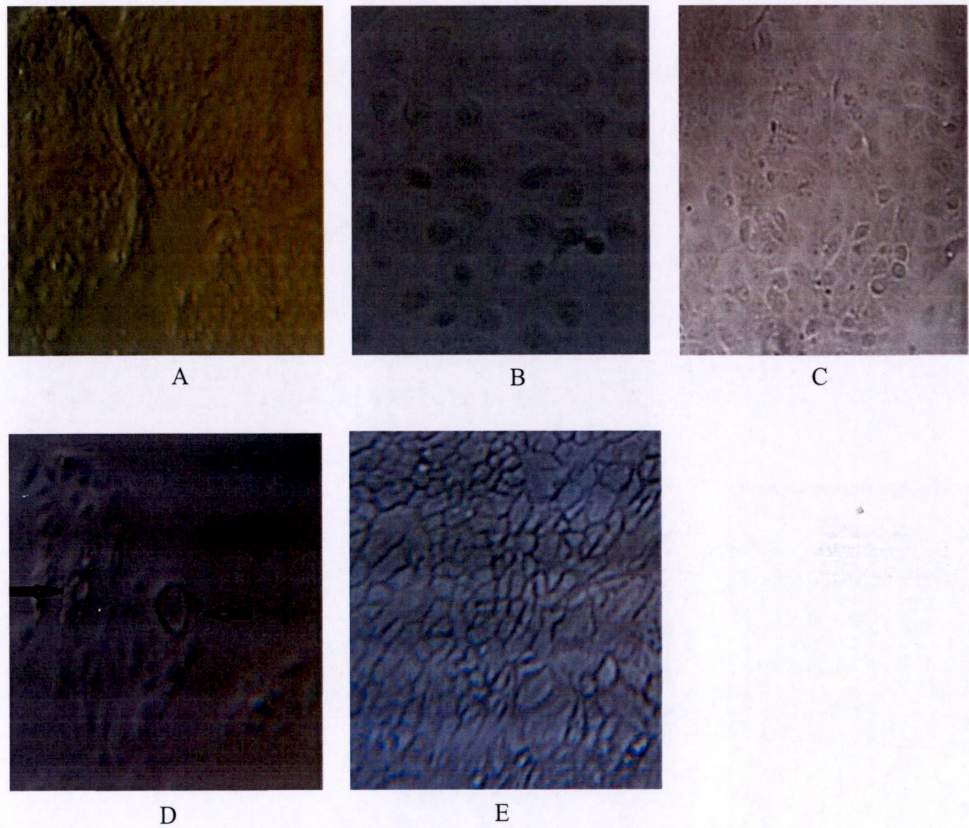

A: 岛屿状的乳腺上皮细胞；B: 鹅卵石状的乳腺上皮细胞；C: 铺路石状的乳腺上皮细胞；D: 空泡圆顶状的乳腺上皮细胞；E: 不规则多边形的乳腺上皮细胞；

A: Mammary epithelial cells like island; B: Mammary epithelial cells like cobblestone; C: Mammary epithelial cells like slabstone; D: Mammary epithelial cells like cavity doom; E: Irregular polygon;

图 5-2 乳腺上皮细胞形态(100×)

Fig. 5-2 Cellular morphology of mammary epithelial cells(100×)

2.3 乳腺上皮细胞生长曲线

经过连续 8 天细胞计数，乳腺上皮细胞的数量增长规律如图 5-3 所示。由图可见，乳腺上皮细胞的生长呈 S 形曲线，开始的 1-3 天，增长缓慢，3-5 天急速增长，6-8 天增长处于平缓期。

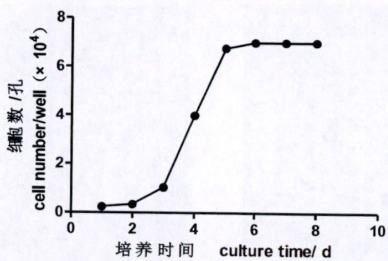

图 5-3 奶牛原代乳腺上皮细胞生长曲线  
Fig. 5-3 Growth curve of bovine mammary epithelial cells

2.4  $\beta$  酪蛋白基因(CSN2)荧光定量产物电泳结果

图 5-4 可见，CSN2 基因荧光定量产物经 2%琼脂糖凝胶电泳，条带大小与引物产物大小相符(CSN2:106 bp; $\beta$ -actin:116 bp)，表明运用本组织块法培养的奶牛乳腺上皮原代细胞分泌表达 CSN2，具有乳腺上皮细胞的特征，可用于开展相关的试验研究。

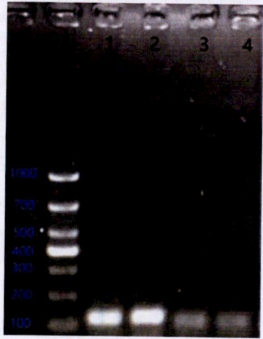

图 5-4 CSN2 基因荧光定量产物电泳图  
Fig. 5-4 CSN2 gene qRT-PCR production electrophoresis graph  
(注: M:marker;1,2: $\beta$ -actin; 3,4: CSN2)  
(Note: M:marker; 1,2: $\beta$ -actin; 3,4: CSN2)

2.5 不同转染浓度和转染试剂量组合的转染效果比较

经荧光显微镜观测，由图 5-5 可见转染效率以 100nMsiRNA+1.0 $\mu$ L 转染试剂组合效果为佳。

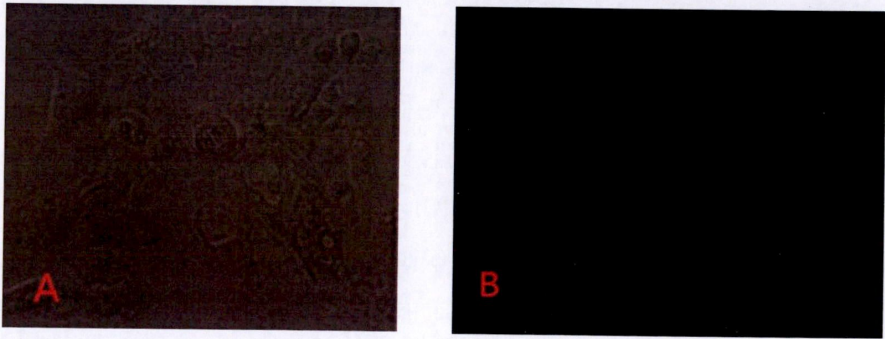

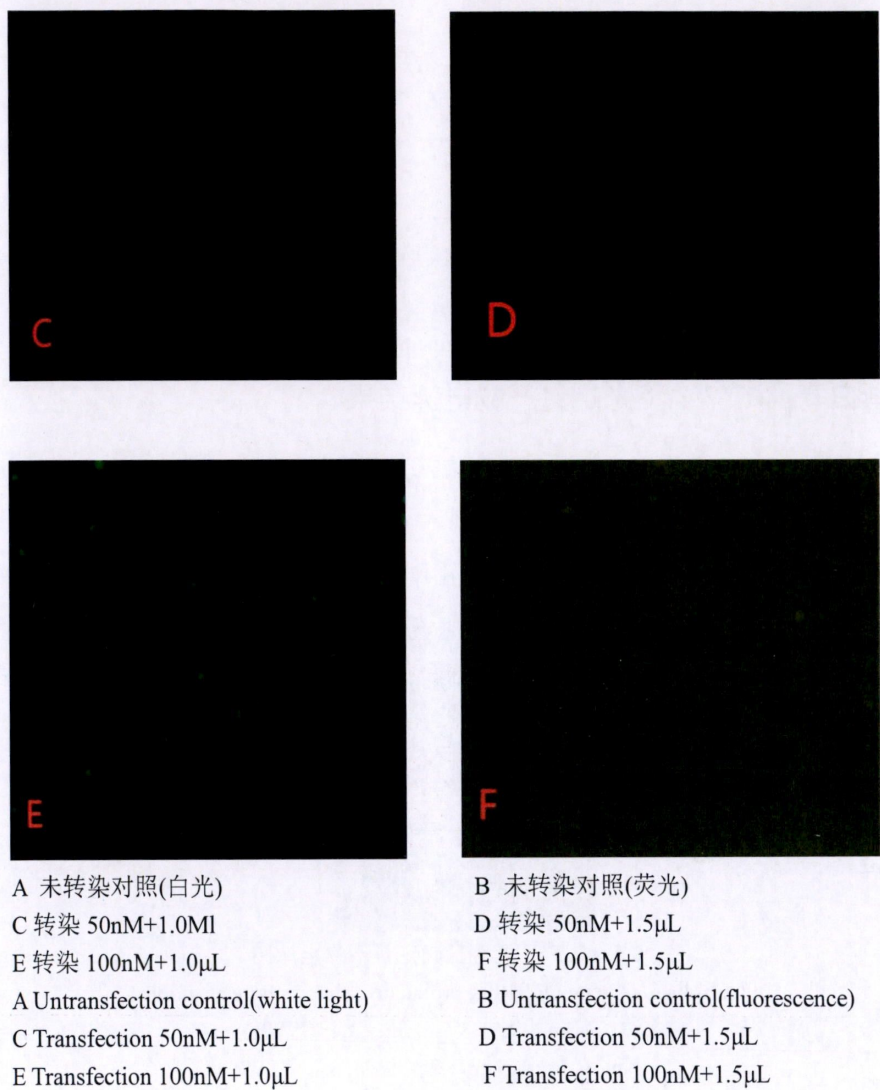

图 5-5 不同转染组合的转染效率

Fig. 5-5 Transfection efficiency of different combination of siRNA and transfection reagent

3 讨论

3.1 乳腺上皮细胞体外培养

对一些在机体中起关键作用的细胞，利用体外培养的方式研究阐明其发挥生理功能的生物学和细胞学的机理极其重要<sup>[10]</sup>。奶牛乳腺上皮细胞具有泌乳与防御病原菌的重要生理和免疫调节的功能，利用体外培养方式研究和阐明其生理和免疫调节的功能和机制是重要的研究方法<sup>[11-12]</sup>。一般多采用胰酶消化法或组织块法进行原代细胞培养。两种培养方法相比较而言，用胰酶消化法培养细胞迁出时间短，但胰酶消化对膜蛋白有损伤，破坏细胞间的信号传递，进而影响细胞功能。用组织块法培养避免了胰酶对细胞的损害，对细胞的活性和功能影响小，利于后续试验的开展。但组织块法时间较胰酶消化法时间长，一般培养

5~6 d 成纤维细胞迁出, 培养 10 d 乳腺上皮细胞迁出<sup>[13]</sup>, 中间经历成纤维细胞与乳腺上皮细胞混合生长的阶段。因而在组织块法培养过程中, 乳腺上皮细胞的形态观察尤为重要。利用乳腺上皮细胞与成纤维细胞在形态上的显著差别区分两者, 是纯化乳腺上皮细胞的基础。乳腺上皮细胞在不同的生长时期具有不同的形态, 通过观察细胞形态可以判断细胞的生长状态。在本试验中观察到在细胞生长旺盛期, 乳腺上皮细胞间排列紧密, 呈现典型的铺路石和鹅卵石形状, 细胞核可见, 这与大多数的乳腺上皮细胞培养试验过程中对乳腺上皮细胞的描述相一致; 而一些非典型的乳腺上皮细胞形态还包括长形、蜂窝状、圆顶型<sup>[13]</sup>、大饼形、腺体形<sup>[14]</sup>等。在本试验中还观察到随乳腺上皮细胞的培养时间延长, 出现了拉网、空泡等形态。乳腺上皮细胞可多次传代, 有研究表明当乳腺上皮细胞传至 20 代时仍具有生物学功能, 未发生细胞转化<sup>[15]</sup>, 但随细胞传代的增加, 乳腺上皮细胞的生长速度减慢, 形态发生改变, 处于分化状态<sup>[13]</sup>。近年有研究者尝试对乳腺上皮细胞过表达一些原癌基因或转染病毒蛋白 SV40 大 T 抗原方法使其发生永生化<sup>[16-17]</sup>, 从而具有无限增殖的特性, 解决原代乳腺上皮细胞难以长期培养的难点。但原代乳腺上皮细胞接近体内细胞生长的状况, 以此为研究模型更接近于体内的真实情况, 这也是原代乳腺上皮细胞的优势所在。

乳腺上皮细胞在动物体内依靠多种物质如激素、细胞因子等维持和调节正常的生理结构和功能, 而在体外培养过程中为维持其正常的结构和生理功能需要有相关因子和激素的参与<sup>[18-20]</sup>。胰岛素是细胞周期的主要外源性调节因子, 能维持正常细胞周期, 促使细胞由 G 期进入 S 期, 促进细胞分裂, 同时胰岛素通过配体约束力和自动磷酸化诱导, 促进胰岛素受体蛋白位点的生成, 激活胰岛素亚基受体 I, 从而促进乳腺上皮细胞乳汁的生物合成。氢化可的松促进细胞的贴壁和伸展。表皮生长因子刺激多种组织来源的上皮类细胞生长和增殖。催乳素促进乳腺上皮细胞乳汁的分泌和细胞极性的形成。确定乳腺上皮细胞的生理功能主要涉及其乳蛋白基因的表达和合成分泌能力。牛乳蛋白主要是酪蛋白、血清蛋白和免疫球蛋白, 其中酪蛋白占 80% 以上, 且是乳腺上皮细胞特有表达的蛋白, 而  $\beta$  酪蛋白占酪蛋白的 36% 以上, 且含量稳定, 因而可利用实时荧光定量 PCR 检测  $\beta$ -酪蛋白 mRNA 的表达量来鉴定乳腺上皮细胞<sup>[21]</sup>。本试验在常规培养基中添加上述几种物质后, 与常规培养基相比缩短了乳腺上皮细胞迁出时间, 细胞生长状态良好, 增殖快, 并成功表达  $\beta$  酪蛋白基因, 表明这些物质可促进原代乳腺上皮细胞的培养, 为后续的相关研究工作建立了良好的试验模型。

影响乳腺上皮细胞培养成功的因素很多, 优良的培养原材料和正确的操作是培养成功的关键。处于泌乳中期的健康乳腺组织是良好的乳腺上皮细胞的来源。用组织法培养初期要注意防止组织块漂浮, 可适当延长组织块倒置贴壁时间, 6-8 h 都可以, 在翻转为正常培养方式和补加培养基时要轻拿轻放培养瓶, 防止培养瓶晃动导致组织块脱落。在传代、冻

存细胞过程中,消化细胞时要注意观察细胞消化状态,防止消化过度或消化不足。前者,细胞受损严重,若传代则分瓶后细胞团聚较多,不易贴壁,若冻存则细胞复苏后活力受损,不易贴壁,死细胞较多。后者消化时间过短,细胞不易消化下来,需要增加消化次数和反复吹打细胞,使其从细胞壁上脱落。在整个细胞培养过程中还要注意防止细胞受到污染。良好的操作习惯可降低细胞污染的概率,有助于细胞培养成功。

### 3.2 细胞转染影响因素

原代细胞培养方法的建立为 miRNA 的功能研究提供了基础。目前 miRNA 功能研究常采用瞬时转染 miRNA 的模拟物(mimic)或抑制物(inhibitor)的方法。细胞转染效率的高低对 miRNA 功能研究的影响较大。影响细胞转染的因素较多,细胞接种密度、转染试剂、核酸浓度等都会影响转染效率。转染前细胞的铺板密度依据细胞的生长快慢而定,一般要保证在转染前细胞密度能达到 50%-80%,降低转染试剂对细胞的影响。外源基因转入真核细胞常用的方法是用病毒载体和非病毒载体<sup>[22]</sup>。病毒载体常采用腺病毒载体,转染效率高,同时对安全性要求高。常用的非病毒载体方法包括脂质体法、磷酸钙沉淀法、电穿孔法<sup>[23]</sup>。这三种方法各有优缺点:(1)电穿孔法是利用外加电场使细胞质膜结构发生变化,形成孔隙通道将外源基因转入细胞内。此法需借助仪器操作完成,细胞致死率高,DNA 和细胞用量大,并且要优化实验参数;(2)磷酸钙法操作简便,但不适用于原代及悬浮培养细胞,且转染率低,重复性差;(3)阳离子性的脂质体法是利用阳离子脂质体表面带正电荷,通过静电作用将核酸分子包裹入内,形成复合体,同时被表面带负电荷的细胞膜吸附,借助膜的融合或细胞的吞作用或直接渗透作用,将核酸分子转入细胞,释放入细胞质中,再进一步进入核内转录、表达。此法适用性广,转染效率高,重复性好,但对 DNA 的质量要求高,转染效果随细胞类型变化大,综合比较几种方法,本试验采用脂质体法转染细胞,且选用的转染试剂在血清存在条件下不影响转染效率,避免无血清条件对细胞生长产生的不利影响。

## 4 小结

本研究运用组织块法成功培养奶牛原代乳腺上皮细胞,并在常规培养基 DMEM/F12 中添加 10%胎牛血清的基础上,补加胰岛素样转铁蛋白硒、催乳素、氢化可的松和表皮生长因子,促进原代乳腺上皮细胞的生长和增殖,缩短纯化乳腺上皮细胞培养时间。乳腺上皮细胞转染以转染浓度 100nM 加 1 $\mu$ L 的转染试剂(96 孔板)效果为佳。

## 参考文献:

- [1] Gray C, Strandberg Y, Donaldson L, et al. Bovine mammary epithelial cells, initiators of innate immune responses to mastitis.[J]. Australian Journal of Experimental Agriculture, 2005, 45(7):757-761.
- [2] Günther J, Czabanska A, Bauer I, et al. *Streptococcus uberis*, strains isolated from the bovine mammary gland evade immune recognition by mammary epithelial cells, but not of macrophages[J]. Veterinary Research, 2016, 47(1):13-26.
- [3] Deplanche M, Alekseeva L, Semenovskaya K, et al. *Staphylococcus aureus* phenol-soluble modulins impair interleukin expression in bovine mammary epithelial cells[J]. Infection & Immunity, 2016, 84(6):1682-1692.
- [4] Wellnitz O, Kerr D E. Cryopreserved bovine mammary cells to model epithelial response to infection[J]. Veterinary Immunology & Immunopathology, 2004, 101(3-4):191-202.
- [5] Buehring G C. Culture of mammary epithelial cells from bovine milk[J]. Journal of Dairy Science, 1990, 73(4):956-963.
- [6] 林杰, 王旭荣, 王磊,等. 荷斯坦奶牛乳腺组织冻存及乳腺上皮细胞原代培养技术改进[J]. 畜牧兽医学报, 2016, 47(5):1067-1074.
- [7] Hu H, Wang J Q, Bu D P, et al. In vitro culture and characterization of a mammary epithelial cell line from Chinese Holstein dairy cow[J]. PLoS One. 2009, 4(11): e7636.
- [8] 李艳, 徐凯, 赵国琦. 奶牛乳腺上皮细胞的培养与鉴定[J]. 上海畜牧兽医通讯, 2014(1):8-11.
- [9] 廖想想. 奶牛金黄色葡萄球菌人工诱导型乳腺炎基因表达谱分析[D]. 扬州大学, 2014.
- [10] Ma X, Hou Y Q, Dahanayaka S, et al. Technical note: isolation and characterization of ovine brown adipocyte precursor cells.[J]. Journal of Animal Science, 2015, 93(5):2094-2099.
- [11] 臧艳丽, 古新宇, 黄鑫,等. NF $\kappa$ B1 在奶牛乳腺上皮细胞中的表达与定位[J]. 中国畜牧兽医, 2016, 43(8):2112-2119.
- [12] Fu Y, Zhou E, Liu Z, et al. *Staphylococcus aureus* and *Escherichia coli* elicit different innate immune responses from bovine mammary epithelial cells[J]. Veterinary Immunology & Immunopathology, 2013, 155(4):245-252.
- [13] 陈建晖, 佟慧丽, 李庆章,等. 奶牛乳腺上皮细胞系的建立[J]. 畜牧兽医学报, 2009, 40(5):743-747.
- [14] 李文清, 王加启, 南雪梅,等. 奶牛乳腺上皮细胞的不同培养方法比较及激素和细胞因子对  $\beta$ -酪蛋白 mRNA 表达的诱导[J]. 动物营养学报, 2014, 26(9):2607-2614.

- [15] 詹康, 贡笑笑, 左晓昕,等. 奶牛乳腺上皮细胞系的培养与鉴定[J]. 动物营养学报, 2015, 27(8):2544-2550.
- [16] Li Q H, Tang M T, Wang X D, et al. Establishment of immortalized cow mammary epithelial cells expressing both hTERT and SV40T[J]. Animal Husbandry & Feed Science, 2015, 7(2):97-100.
- [17] 上官陶, 王洪梅, 冯敏燕,等. 表达 hTERT 及 SV40T 永生化奶牛乳腺上皮细胞系的建立[J]. 山东农业科学, 2013, 45(2):1-4.
- [18] 佟慧丽, 高学军, 李庆章,等. 胰岛素、催乳素对奶山羊乳腺上皮细胞泌乳功能的影响[J]. 畜牧兽医学报, 2008, 39(6):721-725.
- [19] 王皓宇, 秦彤, 郝海生,等. 不同浓度胰岛素样生长因子-I 对体外培养奶牛乳腺上皮细胞乳蛋白和脂肪合成相关基因表达的影响[J]. 中国畜牧兽医, 2013, 40(7):1-5.
- [20] Shushanov S S. Insulin-like growth factors land 2 regulate expression of (3-casein *in vitro* in mouse mammary epithelial cells [J].Bulltin of Experiment Biology Medicine, 2011, 152(2):202-205.
- [21] Barash I, Faerman A, Richenstein M, et al. In vivo and in vitro expression of human serum albumin genomic sequences in mammary epithelial cells with  $\beta$ -lactoglobulin and whey acidic protein promoters[J]. Molecular Reproduction & Development, 1999, 52(3):241-252.
- [22] Cavazzanacalvo M, Thrasher A, Mavilio F. The future of gene therapy. Balancing the risks and benefits of clinical trials [J].Nature, 2004, 427:779-781
- [23] 刘云海, 钟英丽, 任凯群,等. 细胞转染条件的优化[J]. 湖南师范大学自然科学学报, 2004, 27(2):84-88.

# 第六章 miR-122 过表达和抑制表达对 *EPO* 及 JAK-STAT 通路部分基因的表达影响

酪氨酸蛋白激酶-信号传导和转录激活因子(janus kinase-signal transducers and activators oftranscription, JAK-STAT)通路，是一条可以将细胞外信号快速传递到细胞核的信号通路。JAK-STAT 通路介导许多细胞因子在细胞内信号传导，涉及许多生命活动过程如细胞增殖分化、凋亡、炎症、免疫等<sup>[1-3]</sup>。*EPO*(促红细胞生成素)是重要的细胞因子，可激活 JAK-STAT 通路，调节细胞免疫过程<sup>[4-5]</sup>。Usman 研究表明在患乳腺炎奶牛的乳腺中 *JAK2*、*STAT5A*、*STAT5B* 表达下调，提示其可能在乳腺炎的调节中有关键作用<sup>[6]</sup>。有研究报道调控 miR-122 表达影响 *EPO* 的表达<sup>[7]</sup>。在前面的研究中我们已证实 bta-miR-122 与牛 *EPO* 3'UTR 存在作用靶位点，但 miR-122 是否通过靶向调控 *EPO* 而引起 JAK-STAT 通路基因表达改变还未见有相关的研究报道。鉴于此，我们将 miR-122 在奶牛乳腺上皮细胞过表达和抑制表达后，检测 *EPO* 及 JAK-STAT 通路相关基因 *EPOR*、*JAK2*、*STAT5A*、*STAT5B*、*Bcl-2* 的表达水平，以明确 miR-122 对 *EPO* 及 JAK-STAT 通路相关基因表达产生的影响。

## 1 材料与方法

### 1.1 仪器与试剂

部分仪器与试剂见第四、五章。

miRNA 反转录试剂盒(MiR-X™ miRNA First-Strand Synthesis kit,Takara: 638313)、

### 1.2 miR-122 mimic 和 miR-122inhibitor 转染细胞

根据上一章 FAM-siRNA 细胞转染效率的试验结果，确定 miR-122 mimic 和 inhibitor 转染浓度为 100nM，转染试剂量确定为 3.0μL(六孔板)转染细胞。接种前一天细胞铺板，转染前细胞密度为 50%-80%。对每一个转染样品，按下述步骤操作。

(1)稀释 bta-miR-122 mimic：用 30 μL 1×riboFECT™CP Buffer 稀释 1.25 μL 20μM mimic 储存液，轻轻混匀。

(2)制备混合液：加入 3μL riboFECT™CP Reagent 轻轻吹打混匀，室温孵育 15min 以上。

(3)将上述混合液加入到细胞培养基中，轻轻混匀。将培养板放入培养箱中 37℃，5%CO<sub>2</sub> 培养 48h。

miR-122 inhibitor 转染乳腺上皮细胞同上述操作步骤。

1.3 乳腺上皮细胞转染 miR-122 mimic 后 miR-122 的表达检测

1.3.1 细胞 miRNA 的反转录

乳腺上皮细胞转染 miR-122mimic 和 inhibitor 48h 后, 按照第五章 1.7 Trizol 法提取细胞总 RNA, 按 MiR-X™ miRNA FirstStrand Synthesis and SYBR® qRT-PCR 试剂盒说明书反转录 microRNA, 在 0.2mL RNase-free 管中按表 6-1 反应体系配制反应溶液:

表 6-1 miRNA 反转录反应体系  
Table 6-1 miRNA reverse transcriptional reaction system

| 试剂<br>Reagent          | 体积 (μL)<br>Volume (μL) |
|------------------------|------------------------|
| mRQ Buffer (2x)        | 5                      |
| RNA sample (0.25~8 μg) | 3.75                   |
| mRQ Enzyme             | 1.25                   |
| Total                  | 10                     |

混合反应液置于 PCR 仪, 37℃孵育 1h, 85℃, 5min 灭酶活, 反应结束, 补加 90 μL ddH<sub>2</sub>O 至 100 μL, 混合均匀, -20℃保存, 待荧光定量反应。

1.3.2 miR-122 的表达实时荧光定量反应

参考 miRBase 数据库中 bta-miR-122 的序列, 设计 miR-122 上游引物, 引物序列为 TGGAGTGTGACAATGGTGT TTG, 由上海生工合成, 下游引物为通用引物。以 U6 做内参, 按下表 6-2 反应体系配制反应溶液。PCR 反应条件: 95℃ 30 s; 94℃ 15 s, 60℃ 34 s, 进行 40 个循环; 溶解曲线 95℃ 15 s, 60℃ 60 s, 95℃ 15 s。

表 6-2 内参 U6 qRT-PCR 反应体系  
Table 6-2 Internal reference U6 qRT-PCR reaction system

| 试剂<br>Reagent                                           | 体积 (μL)<br>Volume (μL) |
|---------------------------------------------------------|------------------------|
| ddH <sub>2</sub> O                                      | 9                      |
| SYBR Advantage Premix (2X)                              | 12.5                   |
| ROX Dye (50X)                                           | 0.5                    |
| miRNA-specific Primer (10 μM)/ U6 Forward Primer (10μM) | 0.5                    |
| mRQ 3' Primer /U6 Reverse Primer (10 μM)                | 0.5                    |
| cDNA                                                    | 2.0                    |
| Total                                                   | 25                     |

1.4 *EPO*、*EPOR*、*JAK2*、*STAT5A*、*STAT5B*、*Bcl-2* 基因的实时荧光定量反应

按第 5 章 1.7 提取乳腺上皮细胞总 RNA 并反转录为 cDNA，进行 qRT-PCR 反应。根据 NCBI 上牛 *EPO*、*CD59*、*EPOR*、*JAK2*、*STAT5A*、*STAT5B*、*Bcl-2* 基因的序列，设计引物，引物序列见表 6-3，由上海生工合成。

表 6-3 基因引物序列表  
Table 6-3 Gene primer sequence list

| 基因名称<br>Gene   | 基因序列号<br>Gene sequence number | 引物序列 5'-----3'<br>Primer sequence 5'-----3' | 产物(bp)<br>Production(bp) |
|----------------|-------------------------------|---------------------------------------------|--------------------------|
| <i>β-actin</i> | NM_173979.3                   | F ACATCCGCAAGGACCTCTA                       | 116                      |
|                |                               | R TCTTCATTGTGCTGGGTGC                       |                          |
| <i>EPO</i>     | XM_015460412.1                | F TATGCCTGGAAGAGGATGGA                      | 184                      |
|                |                               | R GAAGCAGGGAGGTGAGACTG                      |                          |
| <i>EPOR</i>    | NM_001205601.1                | F CCCACCCACCTAAAGTACC                       | 120                      |
|                |                               | R GGGTTGGAGTAGGGACCATT                      |                          |
| <i>JAK2</i>    | XM_005209981.3                | F TTTGCCAAAATGTGTTCGAG                      | 122                      |
|                |                               | R AGTTTCTGGCAGTGGCTTTG                      |                          |
| <i>STAT5A</i>  | NM_001012673.1                | F TGACCTGCTCATCAACAAGC                      | 125                      |
|                |                               | R ATGGCTTCAGATTCCACAGG                      |                          |
| <i>STAT5B</i>  | NM_174617.4                   | F ACATTTGAGGAGCTGCGACT                      | 121                      |
|                |                               | R CAAACTGAGCCTGGATCCTC                      |                          |
| <i>Bcl-2</i>   | NM_001166486.1                | F CATCGTGGCCTTCTTTGAGT                      | 111                      |
|                |                               | R CGGTTTCAGGTACTCGGTCAT                     |                          |

1.5 数据处理和分析

利用生物统计软件 SPSS16.0 进行 T 检验，结果以平均数±标准误(Mean±SD)表示。

2 结果与分析

2.1 乳腺上皮细胞转染 miR-122 mimic 后 miR-122 的表达变化

由图 6-1 可见，100nM 的 miR-122 mimic 转染入乳腺上皮细胞后，提取细胞总 RNA，将 miRNA 反转录后，与 mimic 阴性对照相比，miR-122 的量上调超过二百倍，差异极显著，表明 miR-122 mimic 成功转入乳腺上皮细胞中。

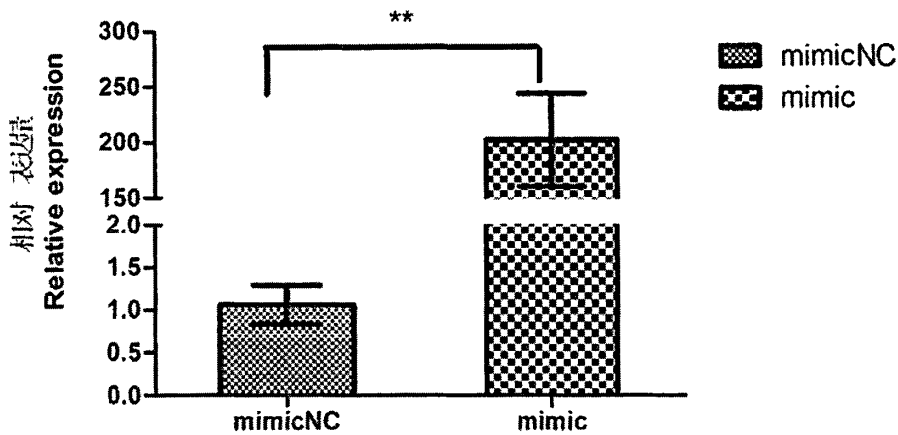

图 6-1 乳腺上皮细胞转染 miR-122 mimic 后 miR-122 表达  
Fig. 6-1 Expression of miR-122 after miR-122mimic transfected into mammary gland epithelia cells

2.2 miR-122 过表达对 *EPO* 及 JAK-STAT 通路基因 *EPOR*、*JAK2*、*STAT5A*、*STAT5B*、*Bcl-2* 表达的影响

图 6-2 显示，miR-122 过表达后，与阴性对照相比 *EPO* 表达量极显著下降，JAK-STAT 通路基因 *EPOR*、*JAK2*、*STAT5A*、*STAT5B*、*Bcl-2* 表达量均下调，且 *Bcl-2* 的表达量显著下调，表明 miR-122 的过表达抑制 *EPO* 及 JAK-STAT 通路的基因的表达。

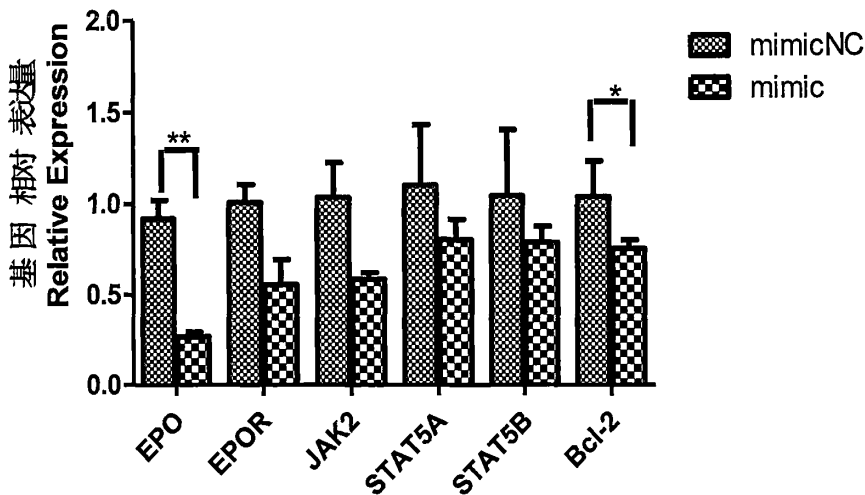

图 6-2 miR-122 过表达对 *EPO*、*EPOR*、*JAK2*、*STAT5A*、*STAT5B* 和 *Bcl-2* 表达的影响  
Fig. 6-2 Effect of miR-122 over-expression on *EPO*、*EPOR*、*JAK2*、*STAT5A*、*STAT5B* and *Bcl-2* expression

2.3 miR-122 抑制表达对 *EPO* 及 JAK-STAT 通路基因 *EPOR*、*JAK2*、*STAT5A*、*STAT5B*、*Bcl-2* 表达的影响

图 6-3 显示，将 miR-122 抑制表达后，与阴性对照相比，*EPO*、*EPOR*、*JAK2*、*STAT5A*、*STAT5B* 表达量均上调，且 *STAT5B* 的表达量上调达到显著水平。

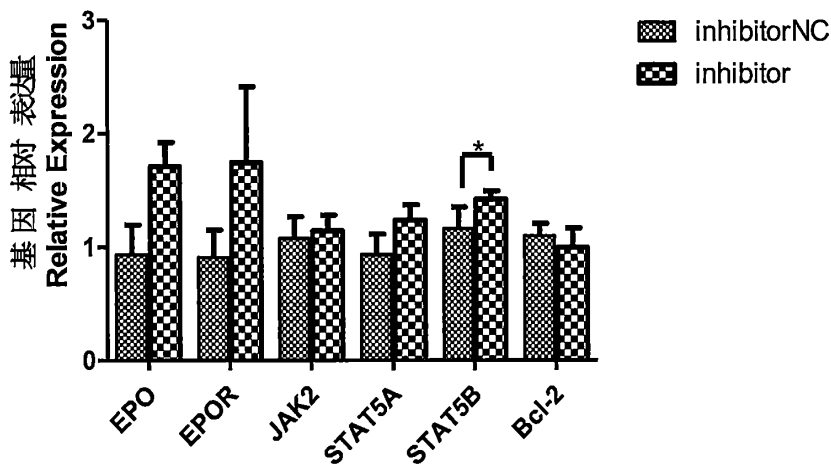

图 6-3 miR-122 抑制表达对 *EPO*、*EPOR*、*JAK2*、*STAT5A*、*STAT5B* 和 *Bcl-2* 表达的影响

Fig. 6-3 Effect of miR-122 inhibited-expression on *EPO*、*EPOR*、*JAK2*、*STAT5A*、*STAT5B* and *Bcl-2* expression

3 讨论

3.1 JAK-STAT 通路与乳腺的关系

JAK-STAT 通路在乳腺组织中对乳汁的合成有重要的作用<sup>[8-10]</sup>。JAK-STAT 通路基因中 *STAT5* 在乳腺上皮细胞中特异表达，在其他类型的上皮细胞如胰腺上皮细胞中处于缺乏状态。*STAT5* 对乳腺的正常发育与乳汁分泌功能的关系十分密切，*STAT5* 在泌乳期的表达量较高，而在其他时期表达量较低<sup>[11]</sup>。

3.2 JAK-STAT 通路基因与免疫的关系

近年的研究表明 JAK-STAT 通路与细胞免疫关系密切。当 *STAT5* 被异常活化时，通过调控下游靶基因 *cyclin D1*、*c-myc*、*Bcl-2* 等的表达，改变细胞周期进程，阻断细胞凋亡过程，诱导细胞的癌性转化<sup>[12]</sup>。姚胜研究表明大鼠在烫伤后合并感染金葡萄菌脓毒症的早期，机体的肝、肾等组织的 *STAT3* 快速活化，激活 JAK-STAT 通路。注射 *JAK2* 特异性抑制剂和 *STAT3* 磷酸化抑制剂，各组织中 *STAT3* 活性不同程度降低，细胞因子及其蛋白表达也随

之减少, 肝功能得到改善, 证实抑制 JAK/STAT 通路的活化可以减轻机体的局部组织的炎症反应, 保护脏器功能<sup>[13]</sup>。

袁峥嵘从金葡菌型乳腺炎奶牛的基因表达谱中发现 *STAT5A* 基因表达下调, 随后利用 Western Blot 技术检测发现 *STAT5A* 蛋白表达量显著低于正常组, 这一结果从蛋白质水平上印证了基因芯片结果的正确性<sup>[14]</sup>。Usman 等研究发现与健康牛相比, 患乳房炎牛的 JAK-STAT 通路基因 *JAK2*、*STAT5A*、*STAT5B* 表达下调, 通过关联分析表明与血清细胞因子和奶牛乳房炎显著相关, 可作为奶牛乳房炎抗性的候选基因<sup>[6]</sup>。赵静等整合分析 5 套公开发表的大肠杆菌感染奶牛乳腺上皮细胞的表达谱芯片数据, 发现显著下调的通路主要与免疫系统、传染性疾病和信号转导相关, 其中含 JAK-STAT 信号转导通路, 而 JAK-STAT 通路在免疫反应过程中的下调可以减缓炎症<sup>[15]</sup>。

### 3.3 miRNA 与 JAK-STAT 通路的调控关系

JAK-STAT 信号通路的激活和抑制受到多因素的调节, 如 *SOCS3* 是 JAK-STAT 信号通路上 *JAK*、*STAT* 基因的抑制剂, 通过直接抑制 *JAK*、*STAT* 的表达而下调 JAK-STAT 通路<sup>[16]</sup>。近年研究发现一些 miRNA 与 JAK-STAT 通路存在互调关系, miRNA 通过直接靶向 JAK-STAT 信号通路基因而调控 JAK-STAT 通路。李洪伟等报道, *TNF- $\alpha$*  和 *STAT3* 是 miR-9a 和 miR-21 的预测靶基因, 幼年特发性关节炎患者外周血单核细胞中 miR-9a 和 miR-21 的表达量显著降低, *TNF- $\alpha$*  和 *STAT3* 的表达量显著升高, JAK-STAT 通路被激活<sup>[17]</sup>。Wu 等研究发现 miR-124 的上调表达显著抑制 *STAT3*、*pSTAT3* 和下游基因 *Bcl-2* 和 *Cyclin D* 的表达, 减弱细胞的侵袭或恶性增生, 诱导细胞 G0/G1 期阻滞, 并促进细胞凋亡<sup>[18]</sup>。Stickel 等报道 miR-146 在干细胞移植后的树突状细胞中通过靶向 JAK/STAT 信号减少 *MHC-II* 的表达<sup>[19]</sup>。miR-155 在幼年脓毒症小鼠肝脏抑制表达, 下调小鼠 JAK-STAT 信号通路, 减轻肝脏损伤<sup>[20]</sup>。Kong 研究发现在人骨瘤细胞中, miR-122 的过表达显著下调 p-PI3K, p-AKT, p-JAK1, p-STAT3, Jagged-1, Notch1 蛋白表达, 从而抑制 PI3K/AKT, JAK/STAT and Notch 通路<sup>[21]</sup>。

### 3.4 miR-122 靶向调控 JAK-STAT 通路的意义

本研究中 miR-122 在乳腺上皮细胞内的过表达引起 *EPO* 表达量显著下调, 而 JAK-STAT 通路上 *EPOR*、*JAK2*、*STAT5A*、*STAT5B* 的表达量均呈下调趋势, 下游基因 *Bcl-2* 的表达量显著下调。*Bcl-2* 是 B 淋巴瘤-2 基因, 是 *Bcl* 家族基因中具有抗细胞凋亡作用的基因, *Bcl-2* 基因表达量的下调意味着细胞凋亡增加。这与前面试验中在显微镜下观察到的攻毒 24h 后的乳腺组织出现的病理结构变化结果相一致: 乳腺组织结构松散, 乳腺间质发生水肿, 细胞间连接空隙增大, 乳腺上皮细胞萎缩, 腺泡腔变大。Cui 等<sup>[22]</sup>发现在人翼状

赘肉病症中 miR-122 表达显著下调,而在上皮细胞表层的抗细胞凋亡基因 *Bcl-w* 表达显著上调,体外翼状赘肉细胞体外培养证实 miR-122 特异性结合 *Bcl-w* 的 mRNA,用 *TNF $\alpha$*  处理细胞,抑制了 miR-122 的表达减少细胞的凋亡,并且这种作用可通过特异性的 siRNA 抑制 *Bcl-w* 的表达而消除。

奶牛乳腺在受到链球菌侵入乳腺的刺激引发感染后,释放多种活性物质,吸引血液中的白细胞(嗜中性粒细胞,PMN)游走到乳汁中,发挥致炎作用。而乳腺内 PMN 的清除是炎症反应消退的必要条件,PMN 的延时凋亡和清除将释放较多的内毒素,加重局部乳腺组织的损害<sup>[23]</sup>。在奶牛链球菌型乳腺炎发展过程中,miR-122 上调表达,抑制 *EPO* 表达减少,通过 JAK-STAT 通路的信号传导减少,引起下游基因 *Bcl-2* 基因的表达量显著下调。*Bcl-2* 是抗细胞凋亡基因,其表达量减少,引起抑制细胞凋亡的作用减弱而促进细胞凋亡,这可能有助于调控乳腺内 PMN 的清除,促进炎症的消退。

#### 4 小结

miR-122 在奶牛乳腺上皮细胞过表达,显著降低 *EPO* 表达量, JAK-STAT 通路中 *EPOR*、*JAK2*、*STAT5A*、*STAT5B* 的表达量均下调, *Bcl-2* 显著下调。miR-122 抑制表达后, *EPO* 及 JAK-STAT 通路中 *EPOR*、*JAK2*、*STAT5A* 的表达量上调, *STAT5B* 表达量显著上调。

#### 参考文献:

- [1] Aaronson D S, Horvath C M. A road map for those who don't know JAK-STAT[J]. Science, 2002, 296(5573):1653-1655.
- [2] Shuai K, Liu B. Regulation of JAK-STAT signalling in the immune system[J]. Nature Reviews Immunology, 2003, 3:900-911.
- [3] Pencik J, Pham H T, Schmoellerl J, et al. JAK-STAT signaling in cancer: From cytokines to non-coding genome[J]. Cytokine, 2016, 87:26-36.
- [4] Shiozawa Y, Jung Y, Ziegler A M, et al. Erythropoietin couples hematopoiesis with bone formation[J]. Plos One, 2010, 5(5):e10853.
- [5] Lopez T V, Lappin T R J, Maxwell P, et al. Autocrine/paracrine erythropoietin signalling promotes JAK/STAT-dependent proliferation of human cervical cancer cells[J]. International Journal of Cancer, 2011, 129(11):2566-2576.
- [6] Usman T, Yu Y, Liu C, et al. Genetic effects of single nucleotide polymorphisms in *JAK2* and *STAT5A* genes on susceptibility of Chinese Holsteins to mastitis[J]. Molecular Biology Reports, 2014, 41(12):8293-8301.

- [7] Galun E, Giladi H, Rivkin M. miR-122 and regulation of erythropoietin [P]. WO/2016/005981.
- [8] Brockman J L, Schroeder M D, Schuler L A. PRL activates the cyclin D1 promoter via the Jak2/Stat pathway[J]. Molecular Endocrinology, 2002, 16(4):774-784.
- [9] Reichenstein M, Rauner G, Barash I. Conditional repression of STAT5 expression during lactation reveals its exclusive roles in mammary gland morphology, milk-protein gene expression, and neonate growth[J]. Molecular Reproduction & Development, 2011, 78(8):585-596.
- [10] 史琳琳. 奶牛乳腺上皮细胞 JAK2-STAT5 和 mTOR 信号通路协同调控乳蛋白合成[D]. 东北农业大学, 2013.
- [11] Wartmann M, Cella N, Hofer P, et al. Lactogenic hormone activation of *at5* and transcription of the  $\beta$ -casein gene in mammary epithelial cells is independent of p42 ERK2 mitogen-activated protein kinase activity[J]. Journal of Biological Chemistry, 1996, 271(50):31863-31868.
- [12] Hilakiviciarke L, Wang C, Kalil M, et al. Nutritional modulation of the cell cycle and breast cancer[J]. Endocrine-related cancer, 2004, 11(4):603-622.
- [13] 姚胜, 姚咏明, 李红云, 等. 抑制 JAK/STAT 通路对烫伤后金黄色葡萄球菌脓毒症大鼠肝损害的影响[J]. 中华危重病急救医学, 2002, 14(6):336-339.
- [14] 袁峥嵘. 金黄色葡萄球菌诱导奶牛实验性乳腺炎研究[D]. 中国农业科学院, 2011.
- [15] 赵静, 陈振亮, 王振, 等. 基于芯片数据和整合分析研究奶牛乳房炎的关键通路[J]. 中国畜牧兽医, 2016, 43(4):862-869.
- [16] Akifusa S, Kamio N, Shimazaki Y, et al. Involvement of the JAK-STAT pathway and SOCS3 in the regulation of adiponectin-generated reactive oxygen species in murine macrophage RAW 264 cells[J]. Journal of Cellular Biochemistry, 2010, 111(3):597-606.
- [17] 李洪伟, 陈挚, 曾华松. 幼年特发性关节炎患者外周血单个核细胞中 miR-21 miR-19a 与 JAK/STAT 通路的表达与意义[J]. 中华风湿病学杂志, 2016, 20(7):459-464.
- [18] Wu Z, Huang W, Chen B, et al. Up-regulation of miR-124 inhibits invasion and proliferation of prostate cancer cells through mediating JAK-STAT3 signaling pathway[J]. European Review for Medical & Pharmacological Sciences, 2017, 21(10):2338-2345.
- [19] Stickel N, Hanke K, Marschner D, et al. MicroRNA-146a reduces MHC-II expression via targeting JAK/STAT-signaling in dendritic cells after stem cell transplantation[J]. Leukemia, 2017,(12): 2732-2741.

- [20] 吕鑫. MiR-155 对幼年脓毒症小鼠肝脏 JAK/STAT 信号通路的影响[D]. 上海交通大学, 2015.
- [21] Kong D, Yang W. Knockdown of lncRNA HULC inhibits proliferation, migration, invasion and promotes apoptosis by sponging miR-122 in osteosarcoma[J]. Journal of Cellular Biochemistry, 2018,119(1):1050-1061.
- [22] Cui Y H, Li H Y, Gao Z X, et al. Regulation of Apoptosis by miR-122 in Pterygium via Targeting Bcl-w[J]. Investigative Ophthalmology & Visual Science, 2016, 57(8):3723-3730.
- [23] 姚学萍, 曹随忠, 杨德英,等. 奶牛多形核白细胞凋亡的分子调控与乳腺免疫[J]. 中国畜牧兽医, 2010, 37(1):120-122.

## 第七章 全文结论及创新点

### 1 结论

(1)通过牛全基因组芯片筛选,共发现差异表达的基因 136 个,上调表达基因 78 个,下调表达基因 58 个。KEGG 分析共有 29 个显著差异基因涉及 38 条通路,包括与免疫相关的通路 JAK-STAT、HMC、Notch 信号通路。

(2)Solexa 深度测序获得 miRNA 表达谱,共筛选出 35 个差异表达的 miRNA,其中上调表达 miRNA 10 个,下调表达 miRNA 25 个。35 个差异 miRNAs 共预测到 18801 个靶基因,靶基因位点数 82832。GO 分析表明靶基因主要富集在调控细胞、结合、催化活性和免疫过程上,KEGG 分析显示其主要富集于与免疫相关的通路如 RIG-样受体信号通路、细胞质 DNA 感受通路和 Notch 信号通路等。

(3)Bta-miR-122 靶向调控牛 *EPO* 基因,作用靶位点位于 *EPO* 3'UTR 的 127-133bp 间,序列为 ACACTCC。bta-miR-122 在乳腺上皮细胞过表达,显著下调 *EPO* 表达量,继而下调 JAK-STAT 通路相关基因 *EPOR*、*JAK2*、*STAT5A*、*STAT5B* 表达量,引起 JAK-STAT 通路下游基因 *Bcl-2* 表达量显著下降,可能对乳腺炎症反应中 PMN 的凋亡消除有积极的作用,从而减轻炎症反应。

### 2 创新点

(1)本研究从转录组学对链球菌感染奶牛乳腺的机体免疫应答的分子机制进行了研究。采用 Affymetrix 基因芯片技术和 Solexa 测序技术分别获得链球菌型乳腺炎乳腺组织的基因表达谱和 microRNA 表达谱,发现 136 个差异表达基因和 35 个差异表达 miRNA。

(2)利用双荧光素酶报告基因系统证实 *EPO* 为 miR-122 的靶基因,作用靶位点位于 *EPO* 3'UTR 的 127-133bp 间,序列为 ACACTCC。miR-122 靶向调控 *EPO* 引起 JAK-STAT 通路在奶牛乳腺炎中下调,*Bcl-2* 表达下调,促进细胞凋亡,可能对乳腺炎症反应中 PMN 的凋亡消除有积极的作用,提示可进一步深入研究 JAK-STAT 通路在奶牛乳腺炎的调控作用。

## 致 谢

光阴荏苒，岁月如梭，四年半的时光转瞬即逝。走到毕业的路口，心中有无限的感慨：如果没有这一路走来给我无限力量的老师、朋友和家人的关爱和帮助，自己很难坚持到今天。在这里我要衷心地感谢所有帮助过我的人们！

感谢导师杨章平教授对我学业的精心指导，博士学业的顺利完成离不开导师的辛勤付出。入学之初，导师即与我谈及四年博士学习过程如何规划，四年的学习有了明确的目标。在毕业论文的设计上，导师与我讨论方案，补充完善试验设计。在文章的写作上，导师悉心传授写作方法，注意要点，精心修改文章。自己在学业上的每一点进步都饱含着导师的辛劳，感念师恩，衷心对导师说声：“谢谢您！”。

一个人的成长离不开集体的力量，在遗传资源实验室这个温暖的团队里，感受了大家给予的热情帮助。感谢毛永江教授、冀德君副教授、张慧敏老师、李明勋老师、孙晓梅老师、陈志老师在论文设计、方案实施、文章写作修改过程中给予的方方面面的帮助和支持。感谢同门王小龙老师、孟祥忍老师、朱文正老师、李锐、陈丹、廖想想、刘贤慧、李蕊、朱怡慧、张成龙、耿晓晗、朱小瑞、邢世宇、樊永亮、王文强、魏涛、张少卿、绪欣、卢徐斌、江静宜、张志鹏、王梦琦、倪炜、张威、夏海磊、储双凤、韩紫音、唐程、姜鸿瑞、郭佳禾、张逸等老师同学在实验过程中的帮忙，谢谢你们！

感谢动物科技学院李碧春教授、李拥军教授、常国斌教授、徐琪副教授、张钰老师、张敬尧老师等给予的帮助。

感谢江苏省家禽科学研究所领导对人才培养的支持，感谢质量安全研究室团队领导高玉时研究员、陆俊贤副研究员及团队成员张小燕、唐梦君、陈大伟、顾荣、唐修君、葛庆联、贾小旭、马丽娜、张静、樊艳凤给予工作上的大力支持。

感谢亲爱的家人对我学业的支持，感谢孩子体谅妈妈很多时间不能陪在你的身边。

千言万语汇成一句：感谢这一路上所有帮助过我的人，谢谢你们的关心和帮助，我将永远铭记在心！

## 博士在读期间发表论文

- [1] **Junhua Pu**, Rui Li, Chenglong Zhang, Dan Chen, Xiangxiang Liao, Yihui Zhu, Xiaohan Geng, Dejun Ji, Yongjiang Mao, Yunchen Gong and Zhangping Yang\*. Expression profiles of miRNAs from bovine mammary glands in response to *Streptococcus agalactiae*-induced mastitis[J]. Journal of Dairy Research, 2017, 84(3):300-308.(SCI, IF=1.598)
- [2] **蒲俊华**, 朱小瑞, 绪欣, 卢徐斌, 毛永江, 杨章平\*. 奶牛原代乳腺上皮细胞的培养及  $\beta$  酪蛋白 mRNA 的表达[J]. 中国畜牧兽医, 2017.44 (7): 1975-1981.
- [3] **Pu Junhua**, Chen Dawei, Liu Yinyin, Yang Zhangping\*. Detection and Analysis of Heavy Metal Pollution in Part Poultry Farms in Eastern China[J]. Animal Husbandry and Feed Science, 2015,(4): 220-222.
- [4] **蒲俊华**, 陈大伟, 刘茵茵, 杨章平\*. 华东某省部分禽场重金属污染检测与分析[J]. 家畜生态学报 2014, 35 (11):70-72.
- [5] 李蕊, 张成龙, 耿晓晗, 李锐, **蒲俊华**, 毛永江, 冀德君, 杨章平\*, 吴苏红, 徐向前, 陆春兵, 任湘莲.等. 金黄色葡萄球菌诱导型乳腺炎对中国荷斯坦奶牛乳中脂肪酸组成的影响[J]. 动物营养学报, 2016(2):426-435.

## 扬州大学学位论文原创性声明和版权使用授权书

### 学位论文原创性声明

本人声明：所呈交的学位论文是在导师指导下独立进行研究工作所取得的研究成果。除文中已经标明引用的内容外，本论文不包含其他个人或集体已经发表的研究成果。对本文的研究做出贡献的个人和集体，均已在文中以明确方式标明。本声明的法律结果由本人承担。

学位论文作者签名：蒲俊华

签字日期：2017 年 12 月 29 日

### 学位论文版权使用授权书

本人完全了解学校有关保留、使用学位论文的规定，即：学校有权保留并向国家有关部门或机构送交学位论文的复印件和电子文档，允许论文被查阅和借阅。本人授权扬州大学可以将学位论文的全部或部分内容编入有关数据库进行检索，可以采用影印、缩印或扫描等复制手段保存、汇编学位论文。同时授权中国科学技术信息研究所将本学位论文收录到《中国学位论文全文数据库》，并通过网络向社会公众提供信息服务。

学位论文作者签名：蒲俊华

导师签名：柳辛平

签字日期：2017 年 12 月 29 日

签字日期：2017 年 12 月 30 日
