# Supplementary material
Source: publisher figshare collection journal article supplement (https://tandf.figshare.com/articles/dataset/_/13117973)
Supplement: Supplementary file 1 [file 1]

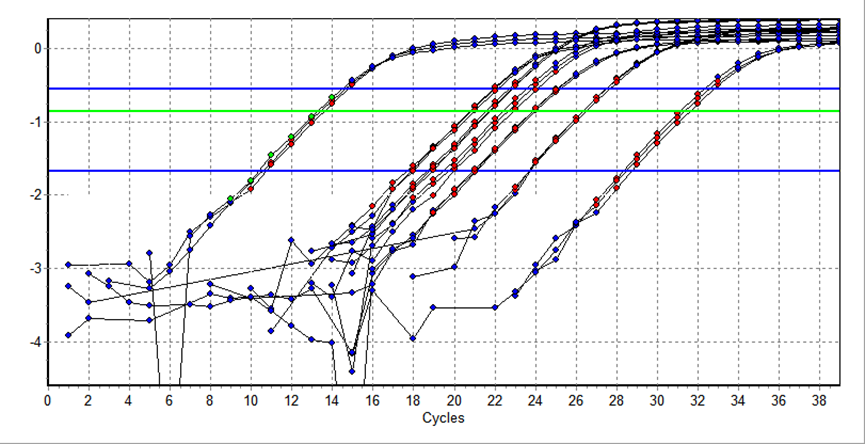
Figure S2. The amplification efficiency ofβ-actin, *EPO*, *EPOR*, *JAK2*, *STAT5A*, *STAT5B* and *BCL*-*2*.

Log(Fluorescence)
